# Supplementary material for: Longitudinal cohort study investigating neurodevelopmental and socioemotional outcomes in school-entry aged children after open heart surgery in Australia and New Zealand: the NITRIC follow-up study protocol
Source: PubMed Central journal article supplement — BMJ Open. 2023 Aug 30;13(8):e075429. doi: 10.1136/bmjopen-2023-075429 (PMC10471882; doi:10.1136/bmjopen-2023-075429), 2023-08-30
Supplement: bmjopen-2023-075429.draft_revisions.pdf [file bmjopen-2023-075429.draft_revisions.pdf]

# BMJ Open

BMJ Open is committed to open peer review. As part of this commitment we make the peer review history of every article we publish publicly available.

When an article is published we post the peer reviewers' comments and the authors' responses online. We also post the versions of the paper that were used during peer review. These are the versions that the peer review comments apply to.

The versions of the paper that follow are the versions that were submitted during the peer review process. They are not the versions of record or the final published versions. They should not be cited or distributed as the published version of this manuscript.

BMJ Open is an open access journal and the full, final, typeset and author-corrected version of record of the manuscript is available on our site with no access controls, subscription charges or pay-per-view fees (<http://bmjopen.bmj.com>).

If you have any questions on BMJ Open's open peer review process please email [info.bmjopen@bmj.com](mailto:info.bmjopen@bmj.com)

# BMJ Open

## A Longitudinal Cohort Study Investigating Long-Term Neurodevelopmental and Socio-emotional Outcomes in Children after Open Heart Surgery: The NITRIC Follow-up Study Protocol

|                               |                                                                                                                                                                                                                                                                                                                                                                                                                                                                                                                                                                                                                                                                                                                                                                                                                                                                                                                                                                                                                                                                                                                                                                                                                                                                                                                                                                                                                                                                                                                                                                                                                                                                                                                                                                                                                                                                                                                                                                                                                                                                                                                                                                                                                                                                                                                                                                                                                                                                    |
|-------------------------------|--------------------------------------------------------------------------------------------------------------------------------------------------------------------------------------------------------------------------------------------------------------------------------------------------------------------------------------------------------------------------------------------------------------------------------------------------------------------------------------------------------------------------------------------------------------------------------------------------------------------------------------------------------------------------------------------------------------------------------------------------------------------------------------------------------------------------------------------------------------------------------------------------------------------------------------------------------------------------------------------------------------------------------------------------------------------------------------------------------------------------------------------------------------------------------------------------------------------------------------------------------------------------------------------------------------------------------------------------------------------------------------------------------------------------------------------------------------------------------------------------------------------------------------------------------------------------------------------------------------------------------------------------------------------------------------------------------------------------------------------------------------------------------------------------------------------------------------------------------------------------------------------------------------------------------------------------------------------------------------------------------------------------------------------------------------------------------------------------------------------------------------------------------------------------------------------------------------------------------------------------------------------------------------------------------------------------------------------------------------------------------------------------------------------------------------------------------------------|
| Journal:                      | <i>BMJ Open</i>                                                                                                                                                                                                                                                                                                                                                                                                                                                                                                                                                                                                                                                                                                                                                                                                                                                                                                                                                                                                                                                                                                                                                                                                                                                                                                                                                                                                                                                                                                                                                                                                                                                                                                                                                                                                                                                                                                                                                                                                                                                                                                                                                                                                                                                                                                                                                                                                                                                    |
| Manuscript ID                 | bmjopen-2023-075429                                                                                                                                                                                                                                                                                                                                                                                                                                                                                                                                                                                                                                                                                                                                                                                                                                                                                                                                                                                                                                                                                                                                                                                                                                                                                                                                                                                                                                                                                                                                                                                                                                                                                                                                                                                                                                                                                                                                                                                                                                                                                                                                                                                                                                                                                                                                                                                                                                                |
| Article Type:                 | Protocol                                                                                                                                                                                                                                                                                                                                                                                                                                                                                                                                                                                                                                                                                                                                                                                                                                                                                                                                                                                                                                                                                                                                                                                                                                                                                                                                                                                                                                                                                                                                                                                                                                                                                                                                                                                                                                                                                                                                                                                                                                                                                                                                                                                                                                                                                                                                                                                                                                                           |
| Date Submitted by the Author: | 08-May-2023                                                                                                                                                                                                                                                                                                                                                                                                                                                                                                                                                                                                                                                                                                                                                                                                                                                                                                                                                                                                                                                                                                                                                                                                                                                                                                                                                                                                                                                                                                                                                                                                                                                                                                                                                                                                                                                                                                                                                                                                                                                                                                                                                                                                                                                                                                                                                                                                                                                        |
| Complete List of Authors:     | <p>Long, Debbie; Queensland University of Technology, School of Nursing; Queensland Children's Hospital, Paediatric Intensive Care Unit<br/>           Anderson, Vicki; Murdoch Children's Research Institute, Clinical Sciences; Royal Children's Hospital, Psychology Service<br/>           Crossley, Louise; Murdoch Children's Research Institute, Clinical Sciences<br/>           Sood, Nikita; Murdoch Children's Research Institute, Clinical Sciences<br/>           Charles, Karina; Queensland Children's Hospital, Paediatric Intensive Care Unit; Queensland University of Technology, School of Nursing<br/>           MacDonald, Anna; The University of Queensland, Child Health Research Centre<br/>           Bora, Samudragupta; University Hospitals Rainbow Babies &amp; Children's Hospital, Case Western Reserve University School of Medicine; The University of Queensland, Mater Research Institute<br/>           Pestell, Carmela; University of Western Australia, School of Psychological Science<br/>           Murrell, Kathryn; Starship Children's Hospital<br/>           Pride, Natalie; The Children's Hospital at Westmead, Kids Neuroscience Centre<br/>           Anderson, Peter; Monash University, Turner Institute for Brain and Mental Health<br/>           Badawi, Nadia; The Children's Hospital at Westmead, Grace Centre for Newborn Care<br/>           Rose, Brian; The University of Queensland, Child Health Research Centre; HeartKids Australia Inc, Australian and New Zealand Fontan Advocacy Committee<br/>           Baillie, Heidi; The Children's Hospital at Westmead, Paediatric Intensive Care Unit<br/>           Masterson, Kate; Royal Children's Hospital, Paediatric Intensive Care Unit; Murdoch Children's Research Institute, Clinical Sciences<br/>           Chumbes Flores, Jenipher; Perth Children's Hospital, Paediatric Intensive Care Unit<br/>           Sherring, Claire; Starship Children's Hospital, Paediatric Intensive Care Unit<br/>           Raman, Sainath; Queensland Children's Hospital, Paediatric Intensive Care Unit; The University of Queensland, Child Health Research Centre<br/>           Beca, John; Starship Children's Hospital, Paediatric Intensive Care Unit<br/>           Erickson, Simon; Perth Children's Hospital, Paediatric Intensive Care Unit<br/>           Festa, Marino; The Children's Hospital at Westmead, Paediatric Intensive</p> |

|           |                                                                                                                                                                                                                                                                                                                                                                                                                                                                                                                                                                                                                                                                                                                                                                                                                                                                                                                                                                                                                                                                                                                                                                                                                                                                                                                                                                                                                                                                                                                                                                                                                                                    |
|-----------|----------------------------------------------------------------------------------------------------------------------------------------------------------------------------------------------------------------------------------------------------------------------------------------------------------------------------------------------------------------------------------------------------------------------------------------------------------------------------------------------------------------------------------------------------------------------------------------------------------------------------------------------------------------------------------------------------------------------------------------------------------------------------------------------------------------------------------------------------------------------------------------------------------------------------------------------------------------------------------------------------------------------------------------------------------------------------------------------------------------------------------------------------------------------------------------------------------------------------------------------------------------------------------------------------------------------------------------------------------------------------------------------------------------------------------------------------------------------------------------------------------------------------------------------------------------------------------------------------------------------------------------------------|
|           | <p>Care Unit<br/> Anderson, Benjamin; Queensland Children's Hospital, Queensland Paediatric Cardiac Service; The University of Queensland, School of Medicine<br/> Venugopal, Prem; Queensland Children's Hospital, Department for Cardiac Surgery; The University of Queensland, School of Medicine<br/> Yim, Deane; Perth Children's Hospital, Department of Paediatric Cardiology<br/> Andrews, David; Perth Children's Hospital, Department of Cardiothoracic Surgery<br/> Cheung, Michael; Royal Children's Hospital, Department of Cardiology; Murdoch Children's Research Institute, Clinical Sciences<br/> Brizard, Christian; Royal Children's Hospital, Department of Cardiac Surgery; Murdoch Children's Research Institute, Clinical Sciences<br/> Gentles, Thomas; Starship Children's Health, Paediatric and Congenital Cardiac Service; The University of Auckland, Paediatrics, Child and Youth Health<br/> Iyengar, Ajay; Starship Children's Hospital, Paediatric and Congenital Cardiac Service; The University of Auckland, Department of Surgery<br/> Nicholson, Ian; The Children's Hospital at Westmead, Heart Centre for Children<br/> Ayer, Julian; The Children's Hospital at Westmead, Heart Centre for Children<br/> Butt, Warwick; Royal Children's Hospital, Paediatric Intensive Care Unit; Murdoch Children's Research Institute, Clinical Sciences<br/> Schlapbach, Luregn; The University of Queensland, Child Health Research Centre; University Children's Hospital Zürich, Department of Intensive Care and Neonatology<br/> Gibbons, Kristen; The University of Queensland, Child Health Research Centre</p> |
| Keywords: | <p>Congenital heart disease &lt; CARDIOLOGY, Paediatric intensive &amp; critical care &lt; ANAESTHETICS, Developmental neurology &amp; neurodisability &lt; PAEDIATRICS, Paediatric cardiology &lt; CARDIOLOGY, Paediatric cardiac surgery &lt; PAEDIATRIC SURGERY</p>                                                                                                                                                                                                                                                                                                                                                                                                                                                                                                                                                                                                                                                                                                                                                                                                                                                                                                                                                                                                                                                                                                                                                                                                                                                                                                                                                                             |
|           |                                                                                                                                                                                                                                                                                                                                                                                                                                                                                                                                                                                                                                                                                                                                                                                                                                                                                                                                                                                                                                                                                                                                                                                                                                                                                                                                                                                                                                                                                                                                                                                                                                                    |

SCHOLARONE™  
Manuscripts

**Title Page:****A Longitudinal Cohort Study Investigating Long-Term Neurodevelopmental and Socio-emotional Outcomes in Children after Open Heart Surgery: The NITRIC Follow-up Study Protocol**

Debbie Long<sup>1,2</sup>, Vicki A Anderson<sup>3,4</sup>, Louise H Crossley<sup>3</sup>, Nikita Tuli Sood<sup>3</sup>, Karina R Charles<sup>1,2</sup>, Anna D MacDonald<sup>5</sup>, Samudragupta Bora<sup>6,7</sup>, Carmela F Pestell<sup>8</sup>, Kathryn Murrell<sup>9</sup>, Natalie Pride<sup>10</sup>, Peter J Anderson<sup>11</sup>, Nadia Badawi<sup>12</sup>, Brian Rose<sup>13,14</sup>, Heidi Baillie<sup>15</sup>, Kate Masterson<sup>3,16</sup>, Jenipher Chumbes Flores<sup>17</sup>, Claire Sherring<sup>18</sup>, Sainath Raman<sup>2,5</sup>, John Beca<sup>18</sup>, Simon Erickson<sup>17</sup>, Marino S Festa<sup>15</sup>, Benjamin W Anderson<sup>19,20</sup>, Prem Venugopal<sup>20,21</sup>, Deane Yim<sup>22</sup>, David Andrew<sup>23</sup>, Michael M H Cheung<sup>24,25</sup>, Christian P Brizard<sup>25,26</sup>, Thomas L Gentles<sup>27,28</sup>, Ajay Iyengar<sup>28,29</sup>, Ian A Nicholson<sup>30</sup>, Julian Ayer<sup>30</sup>, Warwick Butt<sup>3,16</sup>, Luregn J Schlapbach<sup>5,31</sup>, Kristen S Gibbons<sup>5</sup>, and The NITRIC Follow-up Study Group, and The Australian and New Zealand Intensive Care Society (ANZICS) Paediatric Study Group (PSG)

<sup>1</sup> School of Nursing, Centre for Healthcare Transformation, Queensland University of Technology, Kelvin Grove, QLD, Australia

<sup>2</sup> Paediatric Intensive Care Unit, Queensland Children's Hospital, South Brisbane, QLD Australia

<sup>3</sup> Clinical Sciences, Murdoch Children's Research Institute, Parkville, VIC, Australia

<sup>4</sup> Psychology Service, Royal Children's Hospital Melbourne, Parkville, VIC, Australia

<sup>5</sup> Child Health Research Centre, The University of Queensland, Brisbane, QLD, Australia

<sup>6</sup> Department of Pediatrics, University Hospitals Rainbow Babies & Children's Hospital, Case Western Reserve University School of Medicine, Cleveland, OH, United States

1  
2  
3 <sup>7</sup> Mater Research Institute, Faculty of Medicine, The University of Queensland, Brisbane,  
4  
5 QLD, Australia

6  
7 <sup>8</sup> School of Psychological Science, University of Western Australia, Crawley, WA, Australia

8  
9 <sup>9</sup> Starship Children's Hospital, Auckland, New Zealand

10  
11 <sup>10</sup> Kids Neuroscience Centre, The Children's Hospital at Westmead, Westmead, NSW,  
12  
13 Australia

14  
15  
16 <sup>11</sup> Turner Institute for Brain and Mental Health, School of Psychological Sciences, Monash  
17  
18 University, Clayton, VIC, Australia

19  
20  
21 <sup>12</sup> Grace Centre for Newborn Care, The Children's Hospital at Westmead, Westmead, NSW,  
22  
23 Australia

24  
25  
26 <sup>13</sup> Consumer Representative, Child Health Research Centre, The University of Queensland,  
27  
28 South Brisbane, QLD, Australia

29  
30  
31 <sup>14</sup> Australian and New Zealand Fontan Advocacy Committee, HeartKids Ltd, Sydney, NSW,  
32  
33 Australia

34  
35  
36 <sup>15</sup> Paediatric Intensive Care Unit, The Children's Hospital at Westmead, Westmead, NSW,  
37  
38 Australia

39  
40 <sup>16</sup> Paediatric Intensive Care Unit, Royal Children's Hospital, Parkville, VIC, Australia

41  
42 <sup>17</sup> Paediatric Intensive Care Unit, Perth Children's Hospital, Nedlands, WA, Australia

43  
44 <sup>18</sup> Paediatric Intensive Care Unit, Starship Children's Hospital, Auckland, New Zealand

45  
46  
47 <sup>19</sup> Queensland Paediatric Cardiac Service, Children's Health Queensland Hospital and Health  
48  
49 Service, South Brisbane, QLD, Australia

50  
51 <sup>20</sup> School of Medicine, The University of Queensland, South Brisbane, QLD, Australia

52  
53  
54 <sup>21</sup> Department for Cardiac Surgery, Queensland Children's Hospital, Brisbane, QLD,  
55  
56 Australia

57  
58 <sup>22</sup> Department of Paediatric Cardiology, Perth Children's Hospital, Nedlands, WA, Australia

59  
60 <sup>23</sup> Department of Cardiothoracic Surgery, Perth Children's Hospital, Nedlands, WA, Australia

1  
2  
3 <sup>24</sup> Department of Cardiology, Royal Children's Hospital, Parkville, VIC, Australia

4  
5 <sup>25</sup> Murdoch Children's Research Institute, Parkville, VIC, Australia

6  
7 <sup>26</sup> Department of Cardiac Surgery, Royal Children's Hospital, Parkville, VIC, Australia

8  
9  
10 <sup>27</sup> Paediatric and Congenital Cardiac Service, Starship Children's Hospital, Auckland, New  
11 Zealand

12  
13  
14 <sup>28</sup> Paediatrics, Child and Youth Health, University of Auckland, Auckland, New Zealand

15  
16  
17 <sup>29</sup> Department of Surgery, University of Auckland, Auckland, New Zealand

18  
19  
20 <sup>30</sup> Heart Centre for Children, The Children's Hospital at Westmead, Westmead, NSW,  
21 Australia

22  
23  
24 <sup>31</sup> Department of Intensive Care and Neonatology, Children's Research Centre, University  
25 Children's Hospital Zurich, Zurich, Switzerland

### 26 27 28 29 30 **The NITRIC Follow-up Study Group**

31  
32 Kristen S Gibbons, Luregn J Schlapbach, Samudragupta Bora, Devika Ganesamoorthy, Anna  
33 D MacDonald, Antje Blumenthal, Trang M T Pham, Endrias Ergetu, The University of  
34 Queensland, Brisbane, Australia; Debbie Long, Queensland University of Technology,  
35 Brisbane, Australia; Sainath Raman, Karina R Charles, Prem Venugopal, Benjamin W  
36 Anderson, Queensland Children's Hospital, Brisbane, Australia; Warwick Butt, Vicki A  
37 Anderson, Kate Masterson, Jenni Braeutigam, Michael M H Cheung, Christian P Brizard,  
38 Royal Children's Hospital, Melbourne, Australia; Peter J Anderson, Monash University,  
39 Melbourne, Australia; Lachlan Coin, University of Melbourne, Melbourne, Australia; Simon  
40 Erickson, Carmela F Pestell, Jenipher Chumbes Flores, Deane Yim, David Andrews, Perth  
41 Children's Hospital, Perth, Australia; Marino S Festa, Nadia Badawi, Natalie Pride, Heidi  
42 Baillie, Jennifer Darvas, Ian A Nicholson, Julian Ayer, The Children's Hospital at Westmead,  
43 Sydney, Australia; John Beca, Kathryn Murrell, Laura Brown, Claire Sherring, Shelley  
44  
45  
46  
47  
48  
49  
50  
51  
52  
53  
54  
55  
56  
57  
58  
59  
60

1  
2 Coetzer, Thomas L Gentles, Ajay Iyengar, Starship Children's Hospital, Auckland, New  
3  
4 Zealand; and Brian Rose, Holly Williams, Consumer Representatives.  
5  
6  
7  
8

9  
10 **The ANZICS PSG**

11 Breanna Pellegrini, Australian and New Zealand Paediatric Intensive Care Registry; Shane  
12  
13 George, Gold Coast University Hospital, Gold Coast, Australia; Corrine Balit, John Hunter  
14  
15 Hospital, Newcastle, Australia; Felix Oberender, Monash Children's Hospital, Melbourne,  
16  
17 Australia; Simon Erickson, Jenipher Chumbes Flores, Perth Children's Hospital, Perth,  
18  
19 Australia; Karina Charles, Sainath Raman, Michaela Waak, Queensland Children's Hospital,  
20  
21 Brisbane, Australia; Debbie Long, Queensland University of Technology, Brisbane,  
22  
23 Australia; Warwick Butt (Chair), Carmel Delzoppo, Kate Masterson, Johnny Millar, Royal  
24  
25 Children's Hospital, Melbourne, Australia; Anusha Ganeshalingam, Claire Sherring, Starship  
26  
27 Children's Hospital, Auckland, New Zealand; Puneet Singh, Vicky Smith, Sydney Children's  
28  
29 Hospital, Randwick, Australia; Kristen Gibbons, Luregn Schlapbach (Past Chair), Jessica  
30  
31 Schults, The University of Queensland, Brisbane, Australia; and Jennifer Darvas, Marino  
32  
33 Festa, The Children's Hospital at Westmead, Sydney, Australia.  
34  
35  
36  
37  
38  
39  
40

41  
42 **Corresponding Author:**

43 A/Prof Kristen Gibbons, PhD

44 Child Health Research Centre, The University of Queensland

45  
46 62 Graham St, South Brisbane, Queensland, 4101, Australia

47  
48  
49 Email: [k.gibbons@uq.edu.au](mailto:k.gibbons@uq.edu.au); Phone: +61 407 966 708  
50  
51  
52  
53  
54

55  
56 **Competing Interests Statement:**

57 None declared.  
58  
59  
60

1  
2  
3 **Key words:** child; congenital heart disease; cognition; behavior; neurodevelopment;  
4 trajectories; phenotype; preschool; school readiness; screening; latent effects  
5  
6  
7  
8

9 **Funding:** This work is supported by grants from the Medical Research Future Fund  
10 (ARGCHDG000036), Australia; the Children's Hospital Foundation, Australia; the Starship  
11 Foundation, New Zealand; and the Green Lane Research and Educational Fund, New Zealand.  
12  
13  
14

15  
16 VA is supported by a National Health and Medical Research Council (Australia) Investigator  
17 Grant. The funding sources were not involved in study design, analyses, nor interpretation of  
18 the results.  
19  
20  
21  
22  
23  
24

25 **Word Count:** 3571  
26  
27  
28  
29  
30  
31  
32  
33  
34  
35  
36  
37  
38  
39  
40  
41  
42  
43  
44  
45  
46  
47  
48  
49  
50  
51  
52  
53  
54  
55  
56  
57  
58  
59  
60



## Abstract

**Introduction:** Despite growing awareness of neurodevelopmental impairments in children with congenital heart disease (CHD), there is a lack of large, longitudinal, population-based cohorts. Little is known about the contemporary neurodevelopmental profile and the emergence of specific impairments in children with CHD entering school. The performance of standardized screening tools to predict neurodevelopmental outcomes at school age in this high-risk population remains poorly understood. The NITric oxide during cardiopulmonary bypass to improve Recovery in Infants with Congenital heart defects (NITRIC) trial randomized 1371 children <2 years of age, investigating the effect of gaseous nitric oxide applied into the cardiopulmonary bypass oxygenator during heart surgery. The NITRIC Follow-Up Study will follow this cohort annually until 5 years of age to assess outcomes related to cognition and socioemotional behavior at school entry, identify risk factors for adverse long-term outcomes, and evaluate the performance of screening tools.

**Methods and analysis:** Children from the NITRIC trial across 5 sites in Australia and New Zealand are eligible. Follow-up assessments will occur in two stages: i) annual online screening of global neurodevelopment, socioemotional and executive functioning, health-related quality of life and parenting stress at ages 2-5 years; and ii) face-to-face assessment at age 5 years assessing intellectual ability, attention, memory, and processing speed; fine motor skills; language and communication; and socioemotional outcomes. Cognitive and socioemotional outcomes and trajectories of neurodevelopment will be described and demographic, clinical, genetic and environmental predictors of these outcomes will be explored.

**Ethics and dissemination:** All relevant ethical approvals have been obtained. The findings will inform the development of clinical decision tools and improve preventative and intervention strategies in children with CHD. Dissemination of the outcomes of the study is

1  
2  
3 expected via publications in peer-reviewed journals, presentation at conferences, via social  
4  
5 media, podcast presentations and medical education resources, and through consumer partners.  
6  
7

8  
9 **Registration details:** The trial was prospectively registered with the Australian New Zealand  
10  
11 Clinical Trials Registry as “Gene Expression to Predict Long-Term Neurodevelopmental  
12  
13 Outcome in Infants from the NITric oxide during cardiopulmonary bypass to improve  
14  
15 Recovery in Infants with Congenital heart defects (NITRIC) Study – A Multicentre Prospective  
16  
17 Trial.” Trial Registration: ACTRN12621000904875  
18  
19  
20  
21  
22  
23  
24  
25  
26  
27  
28  
29  
30  
31  
32  
33  
34  
35  
36  
37  
38  
39  
40  
41  
42  
43  
44  
45  
46  
47  
48  
49  
50  
51  
52  
53  
54  
55  
56  
57  
58  
59  
60

## ARTICLE SUMMARY

### Strengths and Limitations of this Study

- The use of a longitudinal cohort design based on a large high-quality pragmatic trial with broad inclusion criteria to map neurodevelopmental outcomes will help to improve prediction and early identification of children at risk for poor outcomes following cardiopulmonary bypass surgery for congenital heart disease.
- The NITRIC Follow-Up Study data will be combined with prospective well characterized datasets on clinical, socioeconomic, and biological variables, including multi-omics obtained pre and post CPB.
- Consumers, clinicians and other stakeholders have co-designed the NITRIC Follow-Up study methods, ensuring the project is meaningful to consumers and has the potential to optimise neurodevelopment in children following open heart surgery
- Limitations of this study are the sensitivity to loss to follow-up of participants and potential variations in follow-up timings.

## INTRODUCTION

One out of every 200 children is born with congenital heart disease (CHD) requiring surgery during childhood. Over the past two decades considerable improvements have been achieved in relation to survival following pediatric cardiac surgery, resulting in decreasing mortality rates for most lesions (1-3). Correspondingly, the number of children surviving with CHD has been rapidly increasing with a rising proportion of complex CHD. The burden and cost of long-term physical and neurological morbidities in CHD survivors are forecast to represent a major challenge for healthcare systems in the coming decades (4).

Neurodevelopmental disabilities remain amongst the most common, and the most serious, sequelae in children undergoing surgery for CHD (5). These can manifest as cognitive impairment, speech and language difficulties, visuo-spatial and visuo-motor challenges, attention deficits, motor delays, socioemotional problems, secondary learning disabilities and reduced quality of life (QoL) (6, 7). Early post-operative assessment after infant surgery often reveals abnormalities in muscle tone, poor suck and swallow, and feeding difficulties (8, 9). However, developmental milestones show wide variation, with distinction between children with delayed development who will 'catch-up' to their peers and those who will experience persistent impairments remaining a major challenge (10, 11). The full extent of neurodevelopmental sequelae may only manifest once children reach school age (11, 12). If not detected and managed early, these sequelae may translate into secondary academic problems and reduced quality of life, with long-lasting consequences for the patient, family, future offspring, and society. Furthermore, these represent a major contributor to excessive long-term health costs, which are usually unaccounted for in health economic models (13). To optimise outcomes for all children with CHD, early identification and appropriate supportive and/or rehabilitative management of children at risk for neurodevelopmental difficulties are essential. Historically, neurodevelopmental studies in other at-risk populations, such as preterm

1  
2 infants, have focused on the detection of moderate to severe impairment (e.g., cerebral palsy,  
3 blindness, deafness) (14). An evolving landscape now acknowledges the importance of more  
4 subtle outcomes, including milder degrees of impairment which will have a significant  
5 influence on everyday functioning and quality of life (15). The EPICure cohort studies of  
6 extremely preterm infants provide an example of the role of epidemiological studies in  
7 advancing understanding of the life-course consequences of extreme prematurity (16).  
8  
9  
10  
11  
12  
13  
14  
15  
16  
17

18 Over the last decade, research has identified a range of neurodevelopmental impairments in  
19 children with CHD and, at the same time, highlighted that some CHD long-term outcome  
20 patterns are distinct from preterm populations. Whilst the prevalence of severe cognitive  
21 impairment in children with CHD has declined, deficits in multiple cognitive and psychosocial  
22 domains are increasingly observed (17-19). Several studies have shown that even children  
23 whose intelligence quotient falls within the normal range may exhibit pervasive but subtle  
24 neuropsychological weaknesses, which are often underestimated or go undetected (20-23).  
25 Emerging data show that, while severity of CHD is associated with outcome, patients with both  
26 univentricular and biventricular surgeries demonstrate variable neurodevelopmental outcomes  
27 (18, 24). In addition to events surrounding cardiac surgery, research increasingly demonstrates  
28 that prenatal, patient-specific and environmental factors, including socioeconomic status, play  
29 a large role in determining the long-term outcome of children with CHD (19, 25) and may  
30 contribute to identifying those at risk for poor neurodevelopmental outcomes.  
31  
32  
33  
34  
35  
36  
37  
38  
39  
40  
41  
42  
43  
44  
45  
46  
47  
48  
49

50 In order to design and evaluate strategies which can mitigate the impact of CHD on  
51 neurocognitive outcomes, a better understanding of the risk factors and contemporary  
52 trajectories in these patients is urgently needed. At present, it remains unclear which tools, at  
53 which specific time points, have the best performance to predict child outcomes at school age  
54 (26). The Cardiac Neurodevelopmental Outcome Collaborative (CNOC), an international  
55  
56  
57  
58  
59  
60

1  
2  
3 multidisciplinary group committed to optimizing neurodevelopmental outcomes for children  
4  
5 with CHD, has recently recommended for future research to prioritize longitudinal trajectories  
6  
7 of CHD, designed to identify socioemotional phenotypes and evaluate the effects of early risk  
8  
9 factors on later outcomes including clinical, genetic, socioeconomic, sex and ethnic factors  
10  
11 (27). Such a nuanced characterisation of CHD will require adequately powered, large,  
12  
13 contemporary, longitudinal cohorts representative of the CHD population with a high  
14  
15 granularity of clinical and follow-up data.  
16  
17

18  
19  
20  
21 Between 2017 and 2021, the NITric oxide during cardiopulmonary bypass to improve  
22  
23 Recovery in Infants with Congenital heart defects (NITRIC) trial recruited 1371 infants less  
24  
25 than 2 years of age undergoing CPB surgery and represents the largest randomized controlled  
26  
27 trial (RCT) in the field of CHD to date. This RCT evaluated if the addition of nitric oxide into  
28  
29 the CPB oxygenator would result in more ventilator-free days compared to standard CPB. The  
30  
31 protocol (28), analysis plan (29) and 28-day outcomes (30) of this study have been reported  
32  
33 previously. The NITRIC trial represents a unique population-based and well characterized  
34  
35 large contemporary cohort of CHD children undergoing CPB. The NITRIC Follow-Up Study  
36  
37 has been designed to follow-up the NITRIC trial cohort to address significant gaps in  
38  
39 knowledge of neurodevelopmental outcomes associated with CHD, and to explore associations  
40  
41 of outcome with the host response to CPB assessed by transcriptomics and other biochemical  
42  
43 markers. Below we describe the protocol to follow up the NITRIC trial cohort from 2 to 5 years  
44  
45 of age.  
46  
47  
48  
49

## 50 51 52 53 **Aims**

54  
55 The primary objective of the NITRIC Follow-Up Study is to improve the prediction and early  
56  
57 identification of children at risk for poor developmental outcomes following CPB surgery for  
58  
59  
60

1  
2 CHD, using a comprehensive protocol of age-appropriate standardized assessments. The study  
3  
4 has four aims:

- 5  
6  
7 1. Map the neurodevelopmental, executive function and socioemotional trajectories  
8 following CPB surgery for CHD from 2 to 5 years of age.
- 9  
10  
11 2. Explore CHD neurodevelopmental and socioemotional phenotypes at 5 years.
- 12  
13  
14 3. Determine whether neurodevelopmental screening from 2 to 5 years of age predicts  
15 outcomes for children with CHD once they reach school age.
- 16  
17  
18 4. Identify sociodemographic, parent, child, disease, biochemical, and treatment factors  
19 that differentiate neurodevelopmental and socioemotional outcomes following CPB  
20 surgery.  
21  
22  
23  
24  
25  
26  
27

## 28 **METHODS AND ANALYSIS**

### 29 **Study Design**

30  
31 This is a prospective multicenter, international, longitudinal follow-up study of the NITRIC  
32 trial cohort. The results of this study will be reported according to the Strengthening the  
33 Reporting of Observational Studies in Epidemiology (STROBE) checklist (31) or respective  
34 reporting guidelines for specific nested studies.  
35  
36  
37  
38  
39  
40  
41  
42  
43

### 44 **Participants**

45  
46 Children who underwent CPB surgery for CHD prior to 2 years of age and participated in the  
47 NITRIC trial (30). Children were recruited prior to surgery from six tertiary pediatric hospitals  
48 in Australia, New Zealand and the Netherlands between 2017 and 2021. In the NITRIC Follow-  
49 Up Study, all surviving children from Australian and New Zealand sites will be approached to  
50 participate. Children from the Netherlands may be included in future iterations of this protocol.  
51  
52  
53  
54  
55  
56  
57  
58  
59

### 60 **Recruitment Procedure**

1  
2  
3  
4  
5  
6  
7  
8  
9  
10  
11  
12  
13  
14  
15  
16  
17  
18  
19  
20  
21  
22  
23  
24  
25  
26  
27  
28  
29  
30  
31  
32  
33  
34  
35  
36  
37  
38  
39  
40  
41  
42  
43  
44  
45  
46  
47  
48  
49  
50  
51  
52  
53  
54  
55  
56  
57  
58  
59  
60

Parents of eligible children will be invited to participate in annual online assessments from 2 (2 years 0 months) to 5 years (5 years 11 months) of age. Due to the variation in age at recruitment (0 to 2 years) and the four-year conduct of the original NITRIC trial, some children may participate in as few as one, and others in as many as four, annual assessments. Following annual assessment at age 5, families will be asked to have their child participate in a face-to-face comprehensive neurodevelopmental assessment, and parents will complete a battery of questionnaires. Acknowledging a small number of children may have already turned 5 at study commencement, to ensure inclusiveness we will allow the 5 year online and face-to-face assessments to occur in children up to 6 years 11 months.

Prior to the initial contact, site research coordinators will review patient records to ensure the child is not deceased, and then provide eligible families with information about the NITRIC Follow-Up Study and a link to an informational video (<https://www.nitricfollowup.com/>). Coordinators will contact parents who indicate willingness to participate to further explain the study. Consent for completion of each annual questionnaire will be implied on return of the questionnaire. Parents will be contacted to verbally reconfirm their willingness to participate at each annual timepoint. Parents will be asked to provide written consent for the face-to-face neurodevelopmental assessment.

## Measures

### *Demographic and clinical information*

At their first annual online screening, parents will complete a study-specific demographic survey which includes sex, age, ethnicity, highest education, living arrangements, relationship status, number of children in their care and languages spoken. Each subsequent annual questionnaire will ask parents to document any changes in demographic status. Socio-economic status will be determined using the Socio-Economic Indexes for Areas – Index of



1  
2  
3 Relative Socio-economic Disadvantage (SEIFA IRSD) deciles and The New Zealand Index of  
4 Deprivation (NZDep) derived from the postcode recorded at PICU admission (32, 33).  
5  
6  
7 Postcode will also be used to determine regionality, using the Australian Bureau of Statistics'  
8  
9  
10 5 classes of remoteness (Accessibility and Remoteness Index of Australia [ARIA]) and the  
11  
12 Statistics New Zealand Urban Rural 2018 Classification (34, 35). Clinical information  
13  
14 pertaining to the child's surgery and PICU admission has been recorded prospectively as part  
15  
16 of the NITRIC study and includes diagnosis, CPB and surgical characteristics, severity, and  
17  
18 treatments in PICU, and PICU and hospital length of stay.  
19  
20  
21  
22

### 23 *Annual online screening*

24  
25 Parents will be contacted annually until the child's fifth birthday to complete the online  
26  
27 screening questionnaire (telephone, tablet, laptop, computer) using a secure link to their  
28  
29 electronic questionnaire and contact details of their recruiting site. The questionnaire will be  
30  
31 individualized based on each child's chronological age and development as per the respective  
32  
33 tool. One questionnaire will be completed per child by a primary caregiver. The questionnaire  
34  
35 takes approximately 45-60 minutes to complete and can be completed over several periods by  
36  
37 returning to the saved questionnaire. In the case of parent comorbidity or circumstances  
38  
39 limiting completion of the annual online screen, questionnaires will be administered via  
40  
41 telephone interview by the research coordinator. Unless parents notify of their withdrawal from  
42  
43 the study, attempts will be made to contact parents each year, even if the previous year's  
44  
45 assessment was lost to follow-up.  
46  
47  
48  
49  
50  
51  
52

### 53 *Face-to-face neuropsychological assessment*

54  
55 Following the child's fifth birthday, a face-to-face child assessment will also be conducted.  
56  
57 Parents will be asked to provide written consent to participate in this component of the study  
58  
59 and an assessment appointment will be scheduled. Assessments will be conducted in outpatient  
60

1  
2  
3 clinics at recruiting sites or alternative sites to suit families. The face-to-face assessment will  
4  
5 take 2-3 hours and will be divided into several sessions, with breaks according to the individual  
6  
7 child's needs based on best neuropsychological practice. Order of assessment will be set, with  
8  
9 the intellectual ability (Wechsler Preschool & Primary Scale of Intelligence) tool administered  
10  
11 first. Missing data (due to child or parent disability or lack of cooperation) will be recorded  
12  
13 and categorized.  
14  
15  
16  
17

### 18 **Follow-up Assessments**

19  
20 The annual screening questionnaire and the face-to-face follow-up were designed in  
21  
22 consultation with the multidisciplinary study team, considering measure's reliability and  
23  
24 validity, relevance to the CHD literature and subsequent discussion with consumer  
25  
26 representatives.  
27  
28

29  
30 *Annual questionnaires:* Table 1 details the questionnaires included in annual screening  
31  
32 assessments to be completed by parents. These measures assess child neurodevelopment,  
33  
34 socioemotional status, quality of life, parent emotional well-being and parenting stress. We  
35  
36 will also collect health service utilisation data, and any other major illnesses or surgery in the  
37  
38 previous 12 months, via a study-specific survey.  
39  
40

41  
42 *Face-to-face neurodevelopmental assessment at five years of age:* Table 2 details the face-to-  
43  
44 face test battery which focuses on direct assessment of children's overall intellectual ability  
45  
46 (IQ) and targets cognitive domains vulnerable to early childhood brain insult including  
47  
48 attention, language, memory, motor skills, and executive function. Parents will also rate their  
49  
50 child's adaptive ability, socioemotional function, fatigue and parent-child attachment.  
51  
52  
53  
54  
55  
56  
57  
58  
59  
60

**Table 1. Parent-completed online screening assessments conducted at 2- to 5-years of age**

| Construct                     | Instrument <sup>#</sup>                                             | Number of Items | Scoring and Interpretation                                                                                                                                                                                                                                                                                           | Comments                                                                                                                                                                         |
|-------------------------------|---------------------------------------------------------------------|-----------------|----------------------------------------------------------------------------------------------------------------------------------------------------------------------------------------------------------------------------------------------------------------------------------------------------------------------|----------------------------------------------------------------------------------------------------------------------------------------------------------------------------------|
| <b>Child-focused Measures</b> |                                                                     |                 |                                                                                                                                                                                                                                                                                                                      |                                                                                                                                                                                  |
| Neurodevelopment              | Ages and Stages Questionnaire, 3 <sup>rd</sup> Edition (ASQ-3) (36) | 30              | <p>Each item scored: Yes, Sometimes, or Not yet.</p> <p>Above, close to, and below cut-off scores provided based on aged norms for each domain. Domain scores added to create total score. Higher scores indicate better neurodevelopment.</p> <p><i>Main outcome definition: Total ASQ-3 Score (continuous)</i></p> | <p>5-10 mins to complete.</p> <p>21 age-appropriate questionnaires 1-66 months.</p> <p>Domains: communication, gross motor, fine motor, problem-solving and personal-social.</p> |
| Socioemotional Behavior       | Strengths and Difficulties                                          | 25              | Each item scored on a 3-point Likert scale: Not true, somewhat true,                                                                                                                                                                                                                                                 | 5-10 mins to complete.                                                                                                                                                           |

| Construct                              | Instrument <sup>#</sup>                               | Number of Items    | Scoring and Interpretation                                                                                                                                                                                                                                                                              | Comments                                                                                                                                                                     |
|----------------------------------------|-------------------------------------------------------|--------------------|---------------------------------------------------------------------------------------------------------------------------------------------------------------------------------------------------------------------------------------------------------------------------------------------------------|------------------------------------------------------------------------------------------------------------------------------------------------------------------------------|
|                                        | Questionnaire (SDQ)<br>(37)                           |                    | certainly true. Scale scores derived for Emotional problems, Conduct problems, Hyperactivity, Peer problems, Prosocial, and Total Difficulties, compared to aged norms. Higher scores indicate better socioemotional behavior.<br><i>Main outcome definition: Total Difficulties Score (continuous)</i> | Two age-appropriate questionnaires 2-17 years.<br>Domains: emotional symptoms, conduct problems, hyperactivity/inattention, peer relationship problems, prosocial behaviors. |
| Health Related Quality of Life (HRQoL) | Pediatric Quality of Life Inventory (PedsQL) (38, 39) | 23-38 <sup>a</sup> | Each item scored on a 5-point Likert scale: 0 = Never a problem to 4 = Almost always a problem.<br>Psychosocial Health Summary Score, Physical Health Summary                                                                                                                                           | 5 mins to complete.<br>Five age-appropriate questionnaires 1 month – 18 years.                                                                                               |

| Construct             | Instrument <sup>#</sup>                                                           | Number of Items | Scoring and Interpretation                                                                                                                                                                                                                                                                            | Comments                                                                                                                                                         |
|-----------------------|-----------------------------------------------------------------------------------|-----------------|-------------------------------------------------------------------------------------------------------------------------------------------------------------------------------------------------------------------------------------------------------------------------------------------------------|------------------------------------------------------------------------------------------------------------------------------------------------------------------|
|                       |                                                                                   |                 | <p>Score, and Total Score, compared to aged norms. Higher scores indicate better HRQoL.</p> <p><i>Main outcome definition: Total PedsQL Score (continuous)</i></p>                                                                                                                                    | <p>Domains: physical, emotional, social, and school functioning.</p>                                                                                             |
| Executive Functioning | Behavior Rating Inventory for Executive Function for Pre-schoolers (BRIEF-P) (40) | 63              | <p>Each item scored.</p> <p>Inhibitory Self-Control Index, Flexibility Index, Emergent Metacognition and Global Executive Composite score, compared to aged norms. The recommended cut-off for clinical significance is <math>\geq 65</math>. Lower scores indicate better executive functioning.</p> | <p>10-15 mins to complete.</p> <p>One questionnaire 2 - 5 years 11 months.</p> <p>Domains: inhibit, shift, emotional control, working memory, plan/organize.</p> |

| Construct                      | Instrument <sup>#</sup>                                                                     | Number of Items | Scoring and Interpretation                                                                                                                                                                                                                                      | Comments                                                                                                                                                                                                |
|--------------------------------|---------------------------------------------------------------------------------------------|-----------------|-----------------------------------------------------------------------------------------------------------------------------------------------------------------------------------------------------------------------------------------------------------------|---------------------------------------------------------------------------------------------------------------------------------------------------------------------------------------------------------|
|                                |                                                                                             |                 | <p><i>Main outcome definition: Global Executive Composite Score (continuous)</i></p>                                                                                                                                                                            |                                                                                                                                                                                                         |
| Fatigue                        | <p>The Pediatric Quality of Life Inventory (PedsQL) Multidimensional Fatigue Scale (41)</p> | 6               | <p>Each item scored on 5-point Likert scale: 0 = Never a problem to 4 = Almost always a problem. Total score compared to aged norms. Higher scores indicate lower problems.</p> <p><i>Main outcome definition: Total General Fatigue Score (continuous)</i></p> | <p>General Fatigue subscale only</p> <p>2 minutes to complete.</p> <p>Four age-appropriate questionnaires 2 – 18 years.</p> <p>Domains: General fatigue, Sleep/rest fatigue, and Cognitive fatigue.</p> |
| <b>Parent-focused Measures</b> |                                                                                             |                 |                                                                                                                                                                                                                                                                 |                                                                                                                                                                                                         |
| Emotional Wellbeing            | The Kessler-6 (K6) (42)                                                                     | 6               | <p>Items are scored on a 5-point Likert scale (1= 'none of the time' to 5 =</p>                                                                                                                                                                                 | 1 minute to complete                                                                                                                                                                                    |

| Construct        | Instrument <sup>#</sup>                                | Number of Items | Scoring and Interpretation                                                                                                                                                                                                                                        | Comments                                                                                                                      |
|------------------|--------------------------------------------------------|-----------------|-------------------------------------------------------------------------------------------------------------------------------------------------------------------------------------------------------------------------------------------------------------------|-------------------------------------------------------------------------------------------------------------------------------|
|                  |                                                        |                 | <p>‘all of the time’). Total score ranged from 0-24, with higher scores representing higher levels of psychological distress such as anxiety and depression.</p> <p><i>Main outcome definition: Total K6 Score (continuous)</i></p>                               |                                                                                                                               |
| Parenting Stress | The Parenting Stress Index-4 Short Form (PSI-4-SF)(43) | 36              | <p>Items are scored on a 4-point Likert scale: 1 = Strongly agree to 5 = strongly disagree. A percentile score on Total stress <math>\geq 91\%</math> indicates clinically significant levels of stress.</p> <p>Higher scores indicate more parenting stress.</p> | <p>10 minutes to complete.</p> <p>Domains: Parental distress, Parent-child dysfunctional interaction, and Difficult child</p> |

| Construct              | Instrument <sup>#</sup>     | Number of Items | Scoring and Interpretation                                                                                             | Comments                                                                                                                             |
|------------------------|-----------------------------|-----------------|------------------------------------------------------------------------------------------------------------------------|--------------------------------------------------------------------------------------------------------------------------------------|
|                        |                             |                 | <i>Main outcome definition: Total PIS-4-SF Percentile Score (continuous)</i>                                           |                                                                                                                                      |
| Healthcare Utilisation | Developed by research team. | 12              | <i>Main outcome definition: Total parent-reported utilisation of in- and out-patient visits and costs (continuous)</i> | 2 minutes to complete.<br>Domains: Visits to healthcare professionals and facilities, and finances relating to appointments and care |

<sup>#</sup>All measures used in accordance with associated user manuals; <sup>^</sup>Order of administration of questionnaires standardized; <sup>§</sup> All child-focused measures validated for use as parent-reported; <sup>a</sup> Depending on age.



1  
2  
3  
4  
5  
6  
7  
8  
9  
10  
11  
12  
13  
14  
15  
16  
17  
18  
19  
20  
21  
22  
23  
24  
25  
26  
27  
28  
29  
30  
31  
32  
33  
34  
35  
36  
37  
38  
39  
40  
41  
42  
43  
44  
45  
46

**Table 2. Face-to-face neurodevelopmental assessment at 5-years of age**

| Construct                    | Instrument <sup>#</sup>                                                                                                                          | Number of Items | Scoring and Interpretation                                                                                                                                                                                                                                                                   | Comments                                                                                                                                                                   |
|------------------------------|--------------------------------------------------------------------------------------------------------------------------------------------------|-----------------|----------------------------------------------------------------------------------------------------------------------------------------------------------------------------------------------------------------------------------------------------------------------------------------------|----------------------------------------------------------------------------------------------------------------------------------------------------------------------------|
| <b>Face-to-Face Measures</b> |                                                                                                                                                  |                 |                                                                                                                                                                                                                                                                                              |                                                                                                                                                                            |
| Cognition                    | Wechsler Preschool & Primary Scale of Intelligence – 4 <sup>th</sup> Edition Australia and New Zealand Standardised Edition (WPPSI-IV A&NZ) (44) | 15 subtests     | Three levels of interpretation: Full Scale, Primary Index scales, and Ancillary Index scales. The Full Scale and all indexes have a mean score of 100 and SD of 15. Higher scores indicate higher cognition.<br><br><i>Main outcome definition:</i><br><br><i>Full Scale IQ (continuous)</i> | Block design, Information, Matrix reasoning, Bug search, Picture memory, Similarities, Cancellation and Zoo location subtests only.<br><br>Administration time: 45-60 mins |

| Construct          | Instrument <sup>#</sup>                                                         | Number of Items | Scoring and Interpretation                                                                                                                                                                                                                                                  | Comments                                                                                          |
|--------------------|---------------------------------------------------------------------------------|-----------------|-----------------------------------------------------------------------------------------------------------------------------------------------------------------------------------------------------------------------------------------------------------------------------|---------------------------------------------------------------------------------------------------|
| Motor function     | Movement Assessment Battery for Children, 2 <sup>nd</sup> Edition (MABC-2) (45) | 8 tasks         | 8 Task standard scores and a Total test score.<br>Manual dexterity component score: sum of standard scores of MD1, MD2 and MD3.<br>Higher scores indicate better motor function.<br><i>Main outcome definition:</i><br><i>Manual Dexterity Component Score (continuous)</i> | Posting coins, Threading beads and Drawing trail 1 subtests only.<br>Administration time: 10 mins |
| Executive Function | Day/Night Task (46)                                                             | 16 cards        | Total correct, Total Self Corrections, Total Time, Efficiency Score (Total                                                                                                                                                                                                  | Administration time: 5 mins                                                                       |

| Construct          | Instrument <sup>#</sup>                                                         | Number of Items | Scoring and Interpretation                                                                                                                                                                                                  | Comments                                                                             |
|--------------------|---------------------------------------------------------------------------------|-----------------|-----------------------------------------------------------------------------------------------------------------------------------------------------------------------------------------------------------------------------|--------------------------------------------------------------------------------------|
|                    |                                                                                 |                 | <p>Correct/Total Time to Complete).</p> <p>Higher scores indicate better executive function.</p> <p><i>Main outcome definition:</i></p> <p><i>Efficiency Score (continuous)</i></p>                                         |                                                                                      |
| Attention - Visual | Test of Everyday Attention for Children, 2 <sup>nd</sup> Edition (TEA-Ch2) (47) | 5 trials        | <p>Scaled scores have a mean of 10 and SD of 3 (Range 1-19). Percentile ranked score.</p> <p>Higher scores indicate better attention.</p> <p><i>Main outcome definition:</i></p> <p><i>Attention Score (continuous)</i></p> | <p>Balloon Hunt and Balloons 5 subtests only.</p> <p>Administration time: 7 mins</p> |

| Construct | Instrument <sup>#</sup>                                                                                                                            | Number of Items  | Scoring and Interpretation                                                                                                                                                                                                                                                                       | Comments                                                                                                                     |
|-----------|----------------------------------------------------------------------------------------------------------------------------------------------------|------------------|--------------------------------------------------------------------------------------------------------------------------------------------------------------------------------------------------------------------------------------------------------------------------------------------------|------------------------------------------------------------------------------------------------------------------------------|
| Language  | Clinical Evaluation of Language Fundamentals – Australian and New Zealand 5 <sup>th</sup> Edition Screening Test (CELF-5 A&NZ Screening Test) (48) | 13               | Total Score: sum of the student's score points. Total score compared to a research-based criterion score appropriate for the student's age. Age 5:0-8:11 have one criterion score. Higher scores indicate better language.<br><i>Main outcome definition:</i><br><i>Total Score (continuous)</i> | Word structure, Word Classes, Following directions and Recalling sentences subtests only.<br>Administration time: 10-15 mins |
| Attention | Conners Kiddie Continuous Performance Test, 2 <sup>nd</sup> Edition (K-CPT 2) (49)                                                                 | Up to 200 trials | Higher scores indicate poorer attention.<br><i>Main outcome definition:</i><br><i>Composite Attention Score</i>                                                                                                                                                                                  | 4 domains of attention: Impulsivity, Inattentiveness, Sustained attention, and Vigilance.                                    |

| Construct | Instrument <sup>#</sup>                                                             | Number of Items               | Scoring and Interpretation                                                                                                                                                                                                                                                                                                        | Comments                                                       |
|-----------|-------------------------------------------------------------------------------------|-------------------------------|-----------------------------------------------------------------------------------------------------------------------------------------------------------------------------------------------------------------------------------------------------------------------------------------------------------------------------------|----------------------------------------------------------------|
|           |                                                                                     |                               |                                                                                                                                                                                                                                                                                                                                   | Administration time: 7 mins                                    |
| Memory    | Wide Range Assessment of Memory and Learning, 3 <sup>rd</sup> Edition (WRAML3) (50) | 4 stories<br><br>85 questions | Scaled score, M=10, SD=3.<br><br>Subtest scaled scores derived from the total raw scores on a given subtest- and describe the overall performance on that subtest.<br><br>Story Memory – story memory total raw score.<br><br>Story Recognition – story memory recognition total raw score. Higher scores indicate better memory. | Story Memory subtest only.<br><br>Administration time: 20 mins |

| Construct                               | Instrument <sup>#</sup>                                | Number of Items | Scoring and Interpretation                                                                                                                                                                                                                      | Comments                                                             |
|-----------------------------------------|--------------------------------------------------------|-----------------|-------------------------------------------------------------------------------------------------------------------------------------------------------------------------------------------------------------------------------------------------|----------------------------------------------------------------------|
|                                         |                                                        |                 | <p><i>Main outcome definition:</i></p> <p><i>Verbal Memory Score</i></p> <p><i>(continuous)</i></p>                                                                                                                                             |                                                                      |
| Memory                                  | Working Memory Test Battery for Children (WMTB-C) (51) | 9               | <p>Trials Correct Score: Total number of correct trials achieved before testing is discontinued. Higher scores indicate better memory.</p> <p><i>Main outcome definition:</i></p> <p><i>Total Trials Correct</i></p> <p><i>(continuous)</i></p> | <p>Digit Recall subtest only.</p> <p>Administration time: 5 mins</p> |
| <b>Parent-completed Online Measures</b> |                                                        |                 |                                                                                                                                                                                                                                                 |                                                                      |

| Construct              | Instrument <sup>#</sup>                                           | Number of Items | Scoring and Interpretation                                                                                                                                                                                                                                                                    | Comments                        |
|------------------------|-------------------------------------------------------------------|-----------------|-----------------------------------------------------------------------------------------------------------------------------------------------------------------------------------------------------------------------------------------------------------------------------------------------|---------------------------------|
| Social behavior/Autism | Social Responsiveness Scale, 2 <sup>nd</sup> Edition (SRS-2) (52) | 65              | Each item scored on a 4-point Likert scale: 1 = Not true to 4 = Almost always true.<br>Scores: Total, Treatment subscales, DSM-5 compatible subscales. Higher scores indicate clinically significant deficiencies in social behavior <i>Main outcome definition: Total Score (continuous)</i> | Administration time: 15-20 mins |
| ADHD                   | ADHD Rating Scale, 5 <sup>th</sup> Edition (ADHD-RS-5) (53)       | 18              | Each item scored on a 4-point Likert scale.                                                                                                                                                                                                                                                   | Administration time: 5 mins     |

| Construct          | Instrument <sup>#</sup>                                                    | Number of Items | Scoring and Interpretation                                                                                                                                                                                                                                                                                                                                 | Comments                                                          |
|--------------------|----------------------------------------------------------------------------|-----------------|------------------------------------------------------------------------------------------------------------------------------------------------------------------------------------------------------------------------------------------------------------------------------------------------------------------------------------------------------------|-------------------------------------------------------------------|
|                    |                                                                            |                 | <p>Scores: Total, Inattention and Hyperactivity-Impulsivity.</p> <p>Total raw score: Sum of inattention and hyperactivity subscale raw scores.</p> <p>Converted to total percentile score. Higher scores indicate more impairment in attention.</p> <p><i>Main outcome definition:</i></p> <p><i>Total Percentile Score</i></p> <p><i>(continuous)</i></p> |                                                                   |
| Social functioning | Adaptive Behavior Assessment System, 3 <sup>rd</sup> Edition (ABAS-3) (54) | 46              | Each item is scored on a 4-point Likert scale: 0 = Is not                                                                                                                                                                                                                                                                                                  | Leisure and Social subscales only<br>Administration time: 10 mins |



| Construct | Instrument <sup>#</sup> | Number of Items | Scoring and Interpretation                                                                                                                                                                                                                                                                                                                                                                          | Comments                                             |
|-----------|-------------------------|-----------------|-----------------------------------------------------------------------------------------------------------------------------------------------------------------------------------------------------------------------------------------------------------------------------------------------------------------------------------------------------------------------------------------------------|------------------------------------------------------|
|           |                         |                 | <p>able to do this behavior to 3 =</p> <p>Always (or almost always)</p> <p>Standard Score for Social Adaptive domain compared to norms. Mean of 100 and SD of 15. Lower scores indicate lower adaptive behaviors. General Adaptive Composite Score: Composed on all measured skill areas, providing an overall estimate of adaptive behavior. Higher scores indicate better social functioning.</p> | <p>One age-appropriate questionnaire 5-21 years.</p> |

| Construct | Instrument#                                                                                      | Number of Items | Scoring and Interpretation                                                                                                                                                                                                                                                                               | Comments                                                                                                                                                                |
|-----------|--------------------------------------------------------------------------------------------------|-----------------|----------------------------------------------------------------------------------------------------------------------------------------------------------------------------------------------------------------------------------------------------------------------------------------------------------|-------------------------------------------------------------------------------------------------------------------------------------------------------------------------|
|           |                                                                                                  |                 | <p><i>Main outcome definition:</i></p> <p><i>General Adaptive Composite Score (continuous)</i></p>                                                                                                                                                                                                       |                                                                                                                                                                         |
| Fatigue   | Pediatric Quality of Life Inventory (PedsQL)<br>Multidimensional Fatigue Scale – Full scale (41) | 18              | <p>Each item scored on .5-point Likert scale: 0 = Never a problem to 4 = Almost always a problem.</p> <p>Total score: Sum of general, sleep/rest and cognitive fatigue. Higher scores indicate lower problems.</p> <p><i>Main outcome definition:</i></p> <p><i>Total Fatigue Score (continuous)</i></p> | <p>Administration time: 5 mins</p> <p>Four age-appropriate questionnaires 2 – 18 years.</p> <p>Domains: General fatigue, Sleep/rest fatigue, and Cognitive fatigue.</p> |

| Construct               | Instrument <sup>#</sup>                                                   | Number of Items | Scoring and Interpretation                                                                                                                                                                                                                                                                                                                                                                          | Comments                    |
|-------------------------|---------------------------------------------------------------------------|-----------------|-----------------------------------------------------------------------------------------------------------------------------------------------------------------------------------------------------------------------------------------------------------------------------------------------------------------------------------------------------------------------------------------------------|-----------------------------|
| Parent-Child Attachment | Attachment Relationship Inventory-Caregiver Perspective (ARI-CP 2-5) (55) | 48              | <p>Each item scored on a 6-point Likert scale: 1 = Not at all applicable to 5 = Fully applicable.</p> <p>Four subscales (secure, avoidant, ambivalent, disorganized).</p> <p>Scale scores represent the sum scores of all items of the scale. Higher scores indicate better attachment.</p> <p><i>Main outcome definition:</i></p> <p><i>Global Attachment Score</i></p> <p><i>(continuous)</i></p> | Administration time: 5 mins |

1  
2  
3 #All measures used in accordance with associated user manuals; ^Order of administration of questionnaires standardized; <sup>a</sup> Depending on age.  
4  
5  
6  
7  
8  
9  
10  
11  
12  
13  
14  
15  
16  
17  
18  
19  
20  
21  
22  
23  
24  
25  
26  
27  
28  
29  
30  
31  
32  
33  
34  
35  
36  
37  
38  
39  
40  
41  
42  
43  
44  
45  
46

For peer review only

## Sample Size

The sample size is determined by the existing cohort. Of the 1371 recruited participants for the NITRIC trial, seven did not ultimately undergo CPB surgery, 82 were recruited in The Netherlands, and 44 children are known to be deceased by day 28 post-surgery. Based on available literature on long-term mortality in infants with CHD (56), we estimate that 1150 children will be eligible for inclusion in the NITRIC Follow-Up study. Based on our previous experience and published reports of other follow-up cohorts (57, 58), we aim for an overall follow-up rate of 70% (n= 805) at the 5-year face-to-face assessment.

## Data Analysis

### *Cohort Description*

Characteristics of the cohort will be presented descriptively, including comparison between responders and non-responders to assess potential bias.

### *Outcomes*

The outcomes for each of the assessments (Tables 1 and 2) will be presented at each timepoint with the point estimate and measure of variation. In addition to continuous outcome measures, secondary analyses will use cut-offs to categorize outcomes. Comparison of outcomes against appropriate normative values will be undertaken.

### *Developmental Trajectories*

Latent, group-based trajectory models will be developed to investigate different post-surgery developmental profiles using data from the annual screening (Ages and Stages Questionnaire [ASQ] Total Score, Strengths and Difficulties Questionnaire [SDQ] Total Difficulties Score, and Behavior Rating Inventory for Executive Function for Pre-schoolers [BRIEF-P] Global Executive Composite Score) at 2, 3, 4, and 5 years of age. The data will be explored graphically

1  
2  
3 to determine the most functional form, and a series of models will be developed and compared  
4  
5 using the chi-squared difference tests (nested models) or another criterion (such as Akaike  
6  
7 information criterion for non-nested models).  
8  
9

### 10 11 *Derivation of Socioemotional Phenotypes*

12  
13  
14 The cohort will be split into derivation and validation subsets, ensuring that the subsets are  
15  
16 balanced for the original intervention in the NITRIC trial to avoid bias by intervention, as well  
17  
18 as the original NITRIC trial stratification variables (age group and cardiac pathophysiology).  
19  
20 Candidate variables to be included in the phenotype derivation process will be drawn from the  
21  
22 language, attention, executive functioning, memory and social behavior and functioning  
23  
24 domains. A data-driven approach will be used, and as such, all available variables will be  
25  
26 included. Descriptive analysis will firstly be performed to assess missingness, correlation and  
27  
28 distribution. The appropriate clustering method will be chosen following review of the data  
29  
30 structure. Following determination of the optimal number of socioemotional phenotypes,  
31  
32 graphical methods will be used to describe and visualize the relationship between candidate  
33  
34 variables and phenotypes. Latent class analysis will then be used to assess the reproducibility  
35  
36 of the phenotypes within the entire dataset. Sensitivity analyses will be undertaken by  
37  
38 excluding highly correlated variables.  
39  
40  
41  
42  
43  
44  
45

### 46 *Prediction Models*

47  
48 Multivariable models will be developed to investigate which individual, parent, surgical, PICU  
49  
50 treatment and sociodemographic factors known at the time of surgery are associated with  
51  
52 outcomes in the neurodevelopmental and socioemotional domains for both the annual  
53  
54 questionnaires, and the face-to-face assessment at five years of age, as well as assess the ability  
55  
56 of the annual questionnaires to predict the outcomes documented at the face-to-face  
57  
58 assessment. The model will account for risk factors for cognitive delays (identified through  
59  
60

1  
2 existing literature and clinical judgement), the original NITRIC trial intervention, the NITRIC  
3 trial stratification variables, and study site. Repeated questionnaires for a single child will also  
4  
5 be taken into consideration; the model will allow for instances where the child does not have a  
6  
7 full set of questionnaires (either due to age of enrolment into the NITRIC Follow-up Study or  
8  
9 non-completion of some surveys), through both the choice of statistical model and exploration  
10  
11 and inclusion of risk factors to quantify reason and type of missed follow-up. Additionally,  
12  
13 sensitivity analyses will be undertaken exploring different approaches to account for loss-to-  
14  
15 follow up. In addition to the exploration of the impact of clinical and sociodemographic factors  
16  
17 on neurodevelopmental outcome, the prediction models will be developed assessing several  
18  
19 layers of biomarkers on host response to CPB (transcriptomics, metabolomics, proteomics)  
20  
21 obtained pre- and post-surgery where available.  
22  
23  
24  
25  
26  
27  
28  
29

### 30 **Feasibility and Engagement**

31  
32 To maximize follow-up rates, we have developed detailed standardized training on a follow-  
33  
34 up delivery package for the study informed by published reports (59-62) including the  
35  
36 collection of detailed contact information, using systematic methods for patient contact,  
37  
38 visit/appointment scheduling and cohort retention monitoring (templates for telephone scripts  
39  
40 and written material); log of each contact attempt made to participants; providing reminders  
41  
42 about visits/appointments; providing benefits to children and families that are directly related  
43  
44 to the nature of the study (e.g. reports which can be shared with educators or healthcare  
45  
46 professionals); providing reimbursement for direct research-related expenses such as travel and  
47  
48 accommodation to facilitate participation; providing tokens of appreciation (developed in  
49  
50 consultation with consumer group); and procedures for escalating efforts to reach participants.  
51  
52  
53  
54  
55  
56  
57  
58  
59  
60

### *Assessment feedback for participants*

All parents will receive written results of their child's development from both the annual and face-to-face assessments in a formal report. The annual report results will be articulated in terms of performance ranges (i.e. within/below the range as same-aged peers) for each assessment and emailed to parents at the completion of the online assessment. The report includes a summary of the areas of development assessed and a guide for interpreting the results. The face-to-face report will include an explanation of the areas assessed and will report on each domain area, which will be summarized as below average, average or above average for cognitive profiles and average or elevated for socioemotional profiles. If the assessment results raise areas of concern not previously identified/diagnosed, parents are encouraged to contact their primary healthcare providers to discuss the findings and options for referral to appropriate services for further clinical neuropsychological testing as indicated. Reports have been developed in consultation with the consumer group.

### *Consumer involvement*

The development of the research questions and outcome measures are based on the findings of our previous research into long-term outcomes in critically ill cohorts (28, 63, 64). The importance of long-term outcomes has been investigated by members of the research team through national and international research (65, 66). There has been direct involvement of CHD families with lived experience in the development of study materials and further interviews and focus groups exploring engagement in research, which will be published separately.

### **Data Management**

A purpose-built REDCap<sup>TM</sup> database has been developed (hosted by The University of Queensland) to store participant information, administer annual assessments in survey form, and record outcomes of the face-to-face neuropsychological assessment. In-built dashboards



1  
2  
3 have been developed to enable centralized, and site monitoring of recruitment and survey  
4  
5 completion rates. Following principles of the International Council of Harmonisation, Good  
6  
7 Clinical Practice (ICH-GCP) guidelines, a risk-based assessment has been undertaken to guide  
8  
9 the development of the study monitoring plan.  
10  
11  
12  
13

### 14 **Study Oversight**

15  
16 A Steering Group has been established with clinical, long-term follow-up, data, consumer and  
17  
18 research coordination representatives, and has oversight of the progress of the study, supported  
19  
20 by a Research and Operations Manager. Whole program meetings will be convened during the  
21  
22 study to update all program members on the progress of the study.  
23  
24  
25  
26  
27

### 28 **Ethical Considerations**

29  
30 The study protocol has been approved by the Children's Health Queensland Human Research  
31  
32 Ethics Committee (HREC/20/QCHQ/70626; original submission approved 21<sup>st</sup> December  
33  
34 2020) and New Zealand Health and Disability Ethics Committee (21/NTA/83; original  
35  
36 submission approved 6<sup>th</sup> September 2021). Recruitment commenced on May 10<sup>th</sup>, 2022.  
37  
38  
39  
40  
41

### 42 **Dissemination of Results**

43  
44 Participants will be given the option to receive a summary of results at the completion of the  
45  
46 study, in addition to the ongoing feedback provided from the outcomes of the annual screening  
47  
48 questionnaires and face-to-face assessments. Additionally, publication in high impact peer-  
49  
50 reviewed journals will be sought and presentation at national and international conferences is  
51  
52 anticipated. Novel and modern information dissemination strategies will also be used including  
53  
54 social media, podcast presentations and Free Open Access Medical education (FOAM)  
55  
56 resources to generate discussion and disseminate the outcomes of the study.  
57  
58  
59  
60

## Discussion

This study aims to map neurodevelopmental outcomes and will analyze the effects of CHD on neurodevelopmental trajectories through longitudinal comparisons, socioemotional phenotypes and risk prediction models. Further, we aim to identify screening assessments that predict later neurodevelopmental and socioemotional outcomes. We will use reliable and valid clinical assessment tools and include prospectively collected predictors and potential confounders across socioeconomic, clinical and biochemical datasets.

This study has potential limitations. Firstly, cohort studies are sensitive to loss to follow-up of the participants. To address this we have formulated a comprehensive follow-up quality control plan prior to study commencement and will explore patterns of lost to follow-up through sensitivity analyses. Provision of reports may also encourage parents to seek additional early support and intervention for their child, thus potentially changing the trajectory of outcomes (albeit positively); hence the collection of healthcare utilization data is an important inclusion in this study. Follow-up timing may range amongst participants, therefore we will include age at completion of assessments in statistical modelling.

This study also offers several strengths. First, the cohort is based on a large high-quality pragmatic trial with broad inclusion criteria offering approximation for population-based coverage, which is representative of the contemporary CHD population. Second, follow-up data will be combined with the prospective well characterized datasets on clinical, socioeconomic, and biological variables, including multi-omics obtained pre- and post-CPB. Furthermore, this cohort allows for exploring social determinant interactions with neurodevelopment in a large binational cohort. This will enable us to control for their potential confounding effects on the association between risk factors and neurodevelopmental outcomes. By integrating neurodevelopmental, socioemotional, functional and quality of life measures,

1  
2 we will undertake the largest population-based follow-up cohort of infants undergoing CPB  
3  
4 for CHD and collect extensive patient- and family-centered outcomes between 2 and 5 years  
5  
6 of age. Through the combination with biochemical data obtained pre- and post-CPB, the  
7  
8 program will seek to unravel links between early host response to CPB and late outcomes. As  
9  
10  
11 a result, this study will assist us in identify the most informative time points and predictors to  
12  
13  
14 detect problems and the functions that are most at risk of impairment for these children.  
15  
16

17  
18 In summary, the NITRIC Follow-Up Study will characterize the neurodevelopmental profiles  
19  
20 at school entry in a large prospective cohort of children born with CHD. It is expected to yield  
21  
22 novel data on risk factors and timely identification of neurodevelopmental sequelae after CHD  
23  
24 surgery, which can enable future prevention and intervention strategies.  
25  
26  
27  
28  
29  
30  
31  
32  
33  
34  
35  
36  
37  
38  
39  
40  
41  
42  
43  
44  
45  
46  
47  
48  
49  
50  
51  
52  
53  
54  
55  
56  
57  
58  
59  
60

**Author Statement:**

DAL, VA, WB, KG and LJS conceived the study, wrote the grant, developed the protocol and funding applications, co-wrote the first draft of the manuscript, and approved the final draft. All other authors assisted with development of the interventions and methods, outcomes, and materials, reviewed the manuscript, and approved the final draft.

**Acknowledgements:**

We would like to thank the families who have generously participated in the development of the methods and consumer materials, and who will participate in the study.

**Patient and public involvement:**

Patients and/or the public were involved in the design, or conduct, or reporting, or dissemination plans of this research. Refer to the Methods section for further details.

**REFERENCES**

1. Bronicki RA, Chang AC. Management of the postoperative pediatric cardiac surgical patient. *Crit Care Med*. 2011;39(8):1974-84.
2. Jacobs JP, Mayer JE, Jr., Mavroudis C, O'Brien SM, Austin EH, 3rd, Pasquali SK, et al. The Society of Thoracic Surgeons Congenital Heart Surgery Database: 2016 Update on Outcomes and Quality. *Ann Thorac Surg*. 2016;101(3):850-62.
3. Lynn MM, Salemi JL, Kostelyna SP, Morris SA, Tejtel S, Lopez KN. Lesion-Specific Congenital Heart Disease Mortality Trends in Children: 1999 to 2017. *Pediatrics*. 2022;150(4).
4. Ntiloudi D, Giannakoulas G, Parcharidou D, Panagiotidis T, Gatzoulis MA, Karvounis H. Adult congenital heart disease: A paradigm of epidemiological change. *Int J Cardiol*. 2016;218:269-74.
5. Walker K, Badawi N, Halliday R, Stewart J, Sholler GF, Winlaw DS, et al. Early developmental outcomes following major noncardiac and cardiac surgery in term infants: a population-based study. *J Pediatr*. 2012;161(4):748-52.e1.
6. Loblein HJ, Vukmirovich PW, Donofrio MT, Sanz JH. Prevalence of neurodevelopmental disorders in a clinically referred sample of children with CHD. *Cardiology in the Young*. 2022:1-8.
7. Liamlahi R, Latal B. Neurodevelopmental outcome of children with congenital heart disease. *Handbook of Clinical Neurology*. 2019;162:329-45.
8. Limperopoulos C, Majnemer A, Shevell MI, Rosenblatt B, Rohlicek C, Tchervenkov C. Neurodevelopmental status of newborns and infants with congenital heart defects before and after open heart surgery. *The Journal of pediatrics*. 2000;137(5):638-45.
9. Yi S-H, Kim S-J, Huh J, Jun T-G, Cheon HJ, Kwon J-Y. Dysphagia in infants after open heart procedures. *American journal of physical medicine & rehabilitation*. 2013;92(6):496-503.

10. Fourdain S, St-Denis A, Harvey J, Birca A, Carmant L, Gallagher A, et al. Language development in children with congenital heart disease aged 12–24 months. *European Journal of Paediatric Neurology*. 2019;23(3):491-9.
11. Gaudet I, Paquette N, Bernard C, Doussau A, Harvey J, Beaulieu-Genest L, et al. Neurodevelopmental Outcome of Children with Congenital Heart Disease: A Cohort Study from Infancy to Preschool Age. *The Journal of Pediatrics*. 2021;239:126-35. e5.
12. Lawley CM, Winlaw DS, Sholler GF, Martin A, Badawi N, Walker K, et al. School-Age Developmental and Educational Outcomes Following Cardiac Procedures in the First Year of Life: A Population-Based Record Linkage Study. *Pediatr Cardiol*. 2019;40(3):570-9.
13. Petrou S, Johnson S, Wolke D, Marlow N. The association between neurodevelopmental disability and economic outcomes during mid-childhood. *Child: care, health and development*. 2013;39(3):345-57.
14. Wood NS, Marlow N, Costeloe K, Gibson AT, Wilkinson AR. Neurologic and developmental disability after extremely preterm birth. *New England Journal of Medicine*. 2000;343(6):378-84.
15. Adams-Chapman I, DeMauro SB. Neurodevelopmental outcomes of the preterm infant. *Clinics in perinatology*. 2018;45(3):xvii-xviii.
16. Johnson S, Marlow N. Charting the survival, health and development of extremely preterm infants: EPICure and beyond. *Paediatrics and Child Health*. 2016;26(11):498-504.
17. Majnemer A, Limperopoulos C, Shevell MI, Rohlicek C, Rosenblatt B, Tchervenkov C. A new look at outcomes of infants with congenital heart disease. *Pediatric neurology*. 2009;40(3):197-204.
18. Sarrechia I, Miatton M, De Wolf D, François K, Gewillig M, Meyns B, et al. Neurocognitive development and behaviour in school-aged children after surgery for univentricular or biventricular congenital heart disease. *European Journal of Cardio-Thoracic Surgery*. 2016;49(1):167-74.

- 1  
2  
3 19. Sarrechia I, Miatton M, François K, Gewillig M, Meyns B, Vingerhoets G, et al.  
4  
5 Neurodevelopmental outcome after surgery for acyanotic congenital heart disease. *Research*  
6  
7 *in developmental disabilities*. 2015;45:58-68.  
8
- 9 20. Hövels-Gürich HH, Seghaye M-C, Schnitker R, Wiesner M, Huber W, Minkenberg  
10  
11 R, et al. Long-term neurodevelopmental outcomes in school-aged children after neonatal  
12  
13 arterial switch operation. *The Journal of Thoracic and Cardiovascular Surgery*.  
14  
15 2002;124(3):448-58.  
16
- 17 21. Simons JS, Glidden R, Sheslow D, Pizarro C. Intermediate neurodevelopmental  
18  
19 outcome after repair of ventricular septal defect. *The Annals of thoracic surgery*.  
20  
21 2010;90(5):1586-91.  
22
- 23 22. Hövels-Gürich HH, Konrad K, Skorzewski D, Nacken C, Minkenberg R, Messmer BJ,  
24  
25 et al. Long-term neurodevelopmental outcome and exercise capacity after corrective surgery  
26  
27 for tetralogy of Fallot or ventricular septal defect in infancy. *The Annals of thoracic surgery*.  
28  
29 2006;81(3):958-66.  
30
- 31 23. Bellinger DC, Wypij D, Rappaport LA, Jonas RA, Wernovsky G, Newburger JW.  
32  
33 Neurodevelopmental status at eight years in children with dextro-transposition of the great  
34  
35 arteries: the Boston Circulatory Arrest Trial. *The Journal of thoracic and cardiovascular*  
36  
37 *surgery*. 2003;126(5):1385-96.  
38
- 39 24. Billotte M, Deken V, Joriot S, Vaksmann G, Richard A, Bouzguenda I, et al.  
40  
41 Screening for neurodevelopmental disorders in children with congenital heart disease.  
42  
43 *European Journal of Pediatrics*. 2021;180(4):1157-67.  
44
- 45 25. Ryan KR, Jones MB, Allen KY, Marino BS, Casey F, Wernovsky G, et al.  
46  
47 Neurodevelopmental outcomes among children with congenital heart disease: at-risk  
48  
49 populations and modifiable risk factors. *World Journal for Pediatric and Congenital Heart*  
50  
51 *Surgery*. 2019;10(6):750-8.  
52  
53  
54  
55  
56  
57  
58  
59  
60

- 1  
2  
3 26. Bowe AK, Hourihane J, Staines A, Murray DM. The predictive value of the ages and  
4 stages questionnaire in late infancy for low average cognitive ability at age 5. *Acta*  
5  
6  
7 *Paediatrica*. 2022;111(6):1194-200.
- 8  
9 27. Sanz JH, Anixt J, Bear L, Basken A, Beca J, Marino BS, et al. Characterisation of  
10  
11 neurodevelopmental and psychological outcomes in CHD: a research agenda and  
12  
13  
14 recommendations from the cardiac neurodevelopmental outcome collaborative. *Cardiology in*  
15  
16  
17 *the Young*. 2021;31(6):876-87.
- 18  
19 28. Schlapbach LJ, Horton SB, Long DA, Beca J, Erickson S, Festa M, et al. Study  
20  
21 protocol: NITric oxide during cardiopulmonary bypass to improve Recovery in Infants with  
22  
23  
24  
25  
26  
27  
28  
29  
30  
31  
32  
33  
34  
35  
36  
37  
38  
39  
40  
41  
42  
43  
44  
45  
46  
47  
48  
49  
50  
51  
52  
53  
54  
55  
56  
57  
58  
59  
60  
Congenital heart defects (NITRIC trial): a randomised controlled trial. *BMJ Open*.  
2019;9(8):e026664.
29. Gibbons KS, Schlapbach LJ, Horton SB, Long DA, Beca J, Erickson S, et al.  
Statistical analysis plan for the NITric oxide during cardiopulmonary bypass to improve  
Recovery in Infants with Congenital heart defects (NITRIC) trial. *Critical Care and*  
*Resuscitation*. 2021;23(1):47-58.
30. Schlapbach LJ, Gibbons KS, Horton SB, Johnson K, Long DA, Buckley DH, et al.  
Effect of Nitric Oxide via Cardiopulmonary Bypass on Ventilator-Free Days in Young  
Children Undergoing Congenital Heart Disease Surgery: The NITRIC Randomized Clinical  
Trial. *JAMA*. 2022;328(1):38-47.
31. Von Elm E, Altman DG, Egger M, Pocock SJ, Gøtzsche PC, Vandenbroucke JP, et al.  
The Strengthening the Reporting of Observational Studies in Epidemiology (STROBE)  
Statement: guidelines for reporting observational studies. *International journal of surgery*.  
2014;12(12):1495-9.
32. Australian Bureau of Statistics. Socio-Economic Indexes for Areas 2022 [updated 6  
May 2022. Available from: <https://www.abs.gov.au/websitedbs/censushome.nsf/home/seifa>.



- 1  
2  
3 33. Atkinson J, Salmond C, Crampton P. NZDep2013 index of deprivation. Wellington:  
4 Department of Public Health, University of Otago. 2014.  
5  
6  
7 34. Australian Bureau of Statistics. Remoteness Structure 2016 [Available from:  
8  
9 <https://www.abs.gov.au/statistics/statistical-geography/remoteness-structure>.  
10  
11  
12 35. Statistics New Zealand. New Zealand: an urban/rural profile. Wellington Statistics  
13 New Zealand. 2004.  
14  
15  
16 36. Squires J, Potter L, Bricker D. The ASQ user's guide for the Ages & Stages  
17 Questionnaires: A parent-completed, child-monitoring system. Baltimore, MD, US: Paul H  
18 Brookes Publishing; 1995. xvi, 156-xvi, p.  
19  
20  
21  
22  
23 37. Goodman R. The Strengths and Difficulties Questionnaire: a research note. J Child  
24 Psychol Psychiatry. 1997;38(5):581-6.  
25  
26  
27  
28 38. Varni JW, Burwinkle TM, Seid M, Skarr D. The PedsQL 4.0 as a pediatric population  
29 health measure: feasibility, reliability, and validity. Ambul Pediatr. 2003;3(6):329-41.  
30  
31  
32 39. Varni JW, Seid M, Kurtin PS. PedsQL 4.0: reliability and validity of the Pediatric  
33 Quality of Life Inventory version 4.0 generic core scales in healthy and patient populations.  
34 Med Care. 2001;39(8):800-12.  
35  
36  
37  
38  
39 40. Gioia G, K. E, Isquith P. Behavior Rating Inventory of Executive Function Preschool  
40 Version (BRIEF-P). Odessa, Florida: Psychological Assessment Resources; 2002.  
41  
42  
43 41. Varni JW, Burwinkle TM, Katz ER, Meeske K, Dickinson P. The PedsQL in pediatric  
44 cancer: reliability and validity of the Pediatric Quality of Life Inventory Generic Core Scales,  
45 Multidimensional Fatigue Scale, and Cancer Module. Cancer. 2002;94(7):2090-106.  
46  
47  
48  
49 42. Kessler RC, Andrews G, Colpe LJ, Hiripi E, Mroczek DK, Normand SL, et al. Short  
50 screening scales to monitor population prevalences and trends in non-specific psychological  
51 distress. Psychol Med. 2002;32(6):959-76.  
52  
53  
54  
55 43. Haskett ME, Ahern LS, Ward CS, Allaire JC. Factor structure and validity of the  
56 parenting stress index-short form. J Clin Child Adolesc Psychol. 2006;35(2):302-12.  
57  
58  
59  
60

- 1  
2  
3 44. Wechsler D. Wechsler Preschool and Primary Scale of Intelligence – Fourth Edition.  
4  
5 San Antonio, Texas: The Psychological Corporation; 2012.  
6
- 7 45. Henderson S, Sugden D, Barnett A. Movement Assessment Battery for Children-2.  
8  
9 London: Pearson Assessment; 2007.  
10
- 11 46. Gerstadt CL, Hong YJ, Diamond A. The relationship between cognition and action:  
12 performance of children 3 1/2-7 years old on a Stroop-like day-night test. *Cognition*.  
13  
14 1994;53(2):129-53.  
15
- 16 47. Manly T, Anderson V, Crawford J, George M, Underbjerg M, Robertson IH. Test of  
17  
18 Everyday Attention for Children, Second Edition (TEA–Ch2). London: Harcourt  
19  
20 Assessment; 2016.  
21  
22
- 23 48. Wiig EH, Secord WA, Semel E. Clinical evaluation of language fundamentals:  
24  
25 CELF-5. *Journal of Psychoeducational Assessment*. 2013a;33(5):495-500.  
26  
27
- 28 49. Conners KC. Conners K-CPT 2. Toronto, Canada: Multi-Health Systems; 2015.  
29
- 30 50. Sheslow D, Adams W. Wide Range Assessment of Memory and Learning, 2nd  
31  
32 Edition (WRAML2). Pearson2003.  
33  
34
- 35 51. Gathercole S, Pickering S. Working Memory Test Battery for Children (WMTB-C).  
36  
37 United Kingdom: Pearson Clinical; 2001.  
38  
39
- 40 52. Constantino J, Gruber C. Social Responsiveness Scale - Second Edition (SRS-2).  
41  
42 Torrance, California: Western Psychological Services; 2012.  
43  
44
- 45 53. DuPaul GJ. Parent and teacher ratings of ADHD symptoms: Psychometric properties  
46  
47 in a community-based sample. *Journal of Clinical Child Psychology*. 1991;20:245-53.  
48  
49
- 50 54. Harrison P, Oakland T. Adaptive Behavior Assessment System - Third Edition  
51  
52 (ABAS-3). Sydney: PsychCorp; 2015.  
53  
54
- 55 55. Spruit A, Colonna C, Wissink I, Uittenbogaard R, Willems L, Stams GJ, et al.  
56  
57 Development and validation of the Attachment Relationship Inventory—Caregiver  
58  
59  
60

1  
2 Perception 2–5 years (ARI-CP 2–5): Psychometric structure, external validity, and norms.

3  
4 Infant mental health journal. 2021;42(2):188-205.

5  
6  
7 56. Spector LG, Menk JS, Knight JH, McCracken C, Thomas AS, Vinocur JM, et al.

8  
9 Trends in long-term mortality after congenital heart surgery. Journal of the American College  
10 of Cardiology. 2018;71(21):2434-46.

11  
12  
13 57. Als LC, Tennant A, Nadel S, Cooper M, Pierce CM, Garralda ME. Persistence of  
14 neuropsychological deficits following pediatric critical illness. Critical Care Medicine.

15  
16 2015;43(8):e312-e5.

17  
18 58. Verstraete S, Verbruggen SC, Hordijk JA, Vanhorebeek I, Dulfer K, Güiza F, et al.

19  
20 Long-term developmental effects of withholding parenteral nutrition for 1 week in the  
21 paediatric intensive care unit: a 2-year follow-up of the PEPaNIC international, randomised,  
22 controlled trial. The Lancet Respiratory Medicine. 2019;7(2):141-53.

23  
24 59. Abshire M, Dinglas VD, Cajita MIA, Eakin MN, Needham DM, Himmelfarb CD.

25  
26 Participant retention practices in longitudinal clinical research studies with high retention  
27 rates. BMC medical research methodology. 2017;17(1):1-10.

28  
29 60. Robinson KA, Dennison CR, Wayman DM, Pronovost PJ, Needham DM. Systematic  
30 review identifies number of strategies important for retaining study participants. Journal of  
31 clinical epidemiology. 2007;60(8):757. e1-. e19.

32  
33 61. Robinson KA, Dinglas VD, Sukrithan V, Yalamanchilli R, Mendez-Tellez PA,

34  
35 Dennison-Himmelfarb C, et al. Updated systematic review identifies substantial number of  
36 retention strategies: using more strategies retains more study participants. Journal of clinical  
37 epidemiology. 2015;68(12):1481-7.

38  
39 62. Tansey CM, Matté AL, Needham D, Herridge MS. Review of retention strategies in  
40 longitudinal studies and application to follow-up of ICU survivors. Intensive care medicine.

41  
42 2007;33(12):2051-7.

- 1  
2  
3 63. Long D, Gibbons K, Dow B, Best J, Webb K-L, Liley HG, et al. Effectiveness–  
4 implementation hybrid-2 randomised trial of a collaborative Shared Care Model for Detecting  
5 Neurodevelopmental Impairments after Critical Illness in Young Children (DAISY): pilot  
6 study protocol. *BMJ open*. 2022;12(7):e060714.  
7  
8  
9  
10  
11 64. Schlapbach LJ, Gibbons K, Ridolfi R, Harley A, Cree M, Long D, et al. Resuscitation  
12 in Paediatric Sepsis Using Metabolic Resuscitation–A Randomized Controlled Pilot Study in  
13 the Paediatric Intensive Care Unit (RESPOND PICU): Study Protocol and Analysis Plan.  
14 *Frontiers in pediatrics*. 2021;9:663435.  
15  
16  
17  
18  
19  
20  
21 65. Raman S, Brown G, Long D, Gelbart B, Delzoppo C, Millar J, et al. Priorities for  
22 paediatric critical care research: a modified Delphi study by the Australian and New Zealand  
23 Intensive Care Society Paediatric Study Group. *Critical Care and Resuscitation*.  
24 2021;23(2):194-201.  
25  
26  
27  
28  
29  
30 66. Fink EL, Maddux AB, Pinto N, Sorenson S, Notterman D, Dean JM, et al. A core  
31 outcome set for pediatric critical care. *Critical care medicine*. 2020;48(12):1819-28.  
32  
33  
34  
35  
36  
37  
38  
39  
40  
41  
42  
43  
44  
45  
46  
47  
48  
49  
50  
51  
52  
53  
54  
55  
56  
57  
58  
59  
60

## Standard Protocol Items for Observational Studies (SPIROS)

**Table 1:** Checklist of preliminary items

| Section and topic                   | Description / sub-categories                                                 | Addressed on page number    |
|-------------------------------------|------------------------------------------------------------------------------|-----------------------------|
| <b>i) General Information</b>       |                                                                              |                             |
| Title                               | Descriptive title identifying study design                                   | Page 1                      |
| Protocol version                    | Version or amendment number and date and summary of changes                  | NA                          |
| Protocol summary                    | Brief summary of protocol research                                           | Pages 6-8                   |
| Sponsor and partner institute name  | Name of sponsor and participating institutes (if applicable)                 | Page 12                     |
| Investigators name                  | Name of principal and co investigators.                                      | Pages 1-4                   |
| Affiliation of investigators        | Affiliated institutions of investigators                                     | Pages 1-4                   |
| Principal researcher contact detail | Name, email address, affiliation of Principal researcher for correspondence. | Corresponding author page 4 |
| Table of content                    | Table of content                                                             | NA                          |
| Page number                         | Page number on each page of protocol                                         | Pages 1-49                  |
| List of Abbreviations               | A detailed List of all abbreviations used in protocol with full form.        | NA                          |
| <b>ii) Introduction</b>             |                                                                              |                             |
| Background of study                 | Scientific background of study                                               | Pages 9-11                  |
| Review of prior research            | Summary of all previous relevant research                                    | Pages 9-11                  |

|                         |                                                                                                                                                                                                                                                                               |                                 |
|-------------------------|-------------------------------------------------------------------------------------------------------------------------------------------------------------------------------------------------------------------------------------------------------------------------------|---------------------------------|
| Rationale of study      | Justification for conducting the study                                                                                                                                                                                                                                        | Page 11                         |
| Aim                     | Broader aims and specific objectives of the study                                                                                                                                                                                                                             | Pages 11-12                     |
| Objective of study      | Primary and secondary objectives of study                                                                                                                                                                                                                                     | Page 11                         |
| Prespecified hypothesis | Prespecified null or alternative hypothesis                                                                                                                                                                                                                                   | NA                              |
| <b>iii) Methods</b>     |                                                                                                                                                                                                                                                                               |                                 |
| Study design            | Description of type/design of study                                                                                                                                                                                                                                           | Page 12                         |
| Study setting           | Description of setting, locations, relevant dates, including periods of recruitment/survey, exposure, follow-up, and data collection.                                                                                                                                         | Pages 12-13                     |
|                         | Schedule of study procedure – Figure or table                                                                                                                                                                                                                                 | Tables 1-2                      |
| Sample size             | Estimated number, calculation and assumptions                                                                                                                                                                                                                                 | Page 34                         |
|                         | Power calculation                                                                                                                                                                                                                                                             | NA                              |
| Sampling procedure      | Description of sampling strategy to ensure representativeness and control of potential bias                                                                                                                                                                                   | Page 13                         |
| Participants            | <b>Cohort study</b> —eligibility criteria, and the sources and methods of selection of participants. Describe methods of follow-up.<br>For matched studies, give matching criteria and number of exposed and unexposed                                                        | Pages 12-15<br>Tables 1-2<br>NA |
|                         | <b>Case-control study</b> —Give the eligibility criteria, and the sources and methods of case ascertainment and control selection. Give the rationale for the choice of cases and controls<br>For matched studies, give matching criteria and the number of controls per case |                                 |

|                              |                                                                                                                                                                                                                                                                                                                           |                                                 |
|------------------------------|---------------------------------------------------------------------------------------------------------------------------------------------------------------------------------------------------------------------------------------------------------------------------------------------------------------------------|-------------------------------------------------|
|                              | <b>Cross-sectional study</b> —Give the eligibility criteria, and the sources and methods of selection of participants                                                                                                                                                                                                     |                                                 |
| Variables                    | <ul style="list-style-type: none"> <li>• All outcomes</li> <li>• Exposures- definition of exposure of interest,</li> <li>• Predictors</li> <li>• Potential confounders</li> <li>• Effect modifiers</li> </ul>                                                                                                             | Page 15<br>Tables 1-2                           |
| Data Sources/<br>Measurement | <ul style="list-style-type: none"> <li>• For each variable of interest, give sources of data and details of methods of assessment (measurement).</li> <li>• Describe comparability of assessment methods if there is more than one group</li> <li>• Data collection points table</li> <li>• Blinding procedure</li> </ul> | Page 15<br>Tables 1-2<br><br>NA<br><br>NA<br>NA |
| Bias                         | Describe any efforts to address potential sources of bias<br><br>More specifically- <ul style="list-style-type: none"> <li>• Information bias</li> <li>• Selection Bias</li> <li>• Control for confounding</li> </ul>                                                                                                     | Pages 34-36, 39                                 |
| Statistical analysis<br>plan | <ul style="list-style-type: none"> <li>• Method of primary / secondary outcomes and additional analysis</li> <li>• Handling of missing data</li> <li>• Post-hoc analysis</li> </ul>                                                                                                                                       | Pages 34-36<br><br>Pages 34-36<br>NA            |

|                                               |                                                                                                                                                                                                                                                                                                                                      |                                                                                                       |
|-----------------------------------------------|--------------------------------------------------------------------------------------------------------------------------------------------------------------------------------------------------------------------------------------------------------------------------------------------------------------------------------------|-------------------------------------------------------------------------------------------------------|
| Handling of withdrawals and lost to follow up | Describe the procedures to be followed when a participant ceases participation in the study prematurely or is lost to follow up                                                                                                                                                                                                      | Pages 14-15                                                                                           |
| Replacements                                  | Provide information on whether or not participants who discontinue the study will be replaced via additional recruitment to maintain the required sample size.                                                                                                                                                                       | NA                                                                                                    |
| Outcome                                       | Define and describe all primary and secondary outcome or lost to follow up                                                                                                                                                                                                                                                           | Pages -36<br>Tables 1-2                                                                               |
| Database management                           | <ul style="list-style-type: none"> <li>• Detail plan of database management including:</li> <li>• Data collection (electronic or paper based),</li> <li>• Source data</li> <li>• Data entry</li> <li>• Data editing</li> <li>• Coding</li> <li>• Data storage</li> <li>• Record retention</li> <li>• Data confidentiality</li> </ul> | Pages 37-38<br>Pages 37-38<br>Pages 37-38<br>Pages 37-38<br>Pages 37-38<br>Pages 37-38<br>Pages 37-38 |
| Validation of instrument                      | Reliability / validity of instrument or plan to establish validation                                                                                                                                                                                                                                                                 | Page 15<br>Tables 1-2                                                                                 |
| Follow up                                     | Plan of follow up and addressing lost to follow up                                                                                                                                                                                                                                                                                   | Page 15; Tables 1-2                                                                                   |
| Quality control                               | <ul style="list-style-type: none"> <li>• Method of quality control</li> <li>• Monitoring (internal and external)</li> <li>• Training of surveyors</li> </ul>                                                                                                                                                                         | Pages 37-38<br>Pages 37-38<br>Pages 14-15                                                             |
| Quality assurance                             | Plan of quality assurance                                                                                                                                                                                                                                                                                                            | Pages 37-38                                                                                           |



|                                                  |                                                                                              |                 |
|--------------------------------------------------|----------------------------------------------------------------------------------------------|-----------------|
| Expected outcome /results                        | A brief description of expected outcome or results                                           | Pages 39-40     |
| <b>iv) Ethical consideration</b>                 |                                                                                              |                 |
| Ethical approval                                 | Whether it has been obtained and name of ethical committees. If approval not sought , Reason | Page 38         |
| Agreement and consent                            | Method of taking consent. Reason if consent not sought                                       | Pages 14-15, 38 |
| Risk / Harm to participants                      | Any potential risk or harm to study participants                                             | NA              |
| Adverse event and Severe adverse event reporting | Outline how Adverse Event and Severe adverse event information will be collected.            | NA              |
| <b>v) Reporting and dissemination</b>            |                                                                                              |                 |
| Protocol amendments                              | Methods of communicating to investigators/IRBs and documenting                               | Pages 37-38     |
| Dissemination                                    | How results will be disseminated to participants, practitioners, public                      | Page 38         |
| Publication Plan                                 | Who has right to publish; restrictions; authorship guidelines<br>Open Access                 | NA              |
| Reporting of early stopping                      | Dissemination of results if trial is stopped early (for any reason)                          | NA              |
| <b>vi) Others</b>                                |                                                                                              |                 |
| Limitations                                      | Limitations of proposed study, including risk of bias                                        | Page 39         |
| Strength of study                                | Highlight strengths of proposed study                                                        | Page 39-40      |
| References                                       | List of references cited in protocol                                                         | Pages 42-49     |

|                                          |                                                                                                                                                |                              |
|------------------------------------------|------------------------------------------------------------------------------------------------------------------------------------------------|------------------------------|
| Data collection forms                    | Summary table of all forms used for data collection at each point of study                                                                     | Page 37                      |
| Informed consent forms                   | Sample of informed consent form, translated into local language                                                                                | NA                           |
| Funding                                  | Source of funding and the role of the funders for the present study                                                                            | Page 5                       |
| Acknowledgement for protocol development | Acknowledgement of persons involved in protocol preparation                                                                                    | Page 41                      |
| Data sharing policy                      | To describe how data will be made available in public domain.                                                                                  | NA                           |
| Contributions of authors to protocol     | Listed authors should have participated sufficiently in preparation of protocol with details of their contribution.                            | Page 41                      |
| Trial registry                           | For observational studies also registered as trial                                                                                             | Page 7                       |
| Annexures                                | Data collection form /instruments<br>Informed consent form<br>Standard operating procedures (SOPs)<br>Detailed Statistical analysis plan (SAP) | NA<br>NA<br>Tables 1-2<br>NA |

# BMJ Open

## A Longitudinal Cohort Study Investigating Neurodevelopmental and Socio-emotional Outcomes in School-Entry aged Children after Open Heart Surgery in Australia and New Zealand: The NITRIC Follow-up Study Protocol

|                               |                                                                                                                                                                                                                                                                                                                                                                                                                                                                                                                                                                                                                                                                                                                                                                                                                                                                                                                                                                                                                                                                                                                                                                                                                                                                                                                                                                                                                                                                                                                                                                                                                                                                                                                                                                                                                                                                                                                                                                                                                                                                                                                                                                              |
|-------------------------------|------------------------------------------------------------------------------------------------------------------------------------------------------------------------------------------------------------------------------------------------------------------------------------------------------------------------------------------------------------------------------------------------------------------------------------------------------------------------------------------------------------------------------------------------------------------------------------------------------------------------------------------------------------------------------------------------------------------------------------------------------------------------------------------------------------------------------------------------------------------------------------------------------------------------------------------------------------------------------------------------------------------------------------------------------------------------------------------------------------------------------------------------------------------------------------------------------------------------------------------------------------------------------------------------------------------------------------------------------------------------------------------------------------------------------------------------------------------------------------------------------------------------------------------------------------------------------------------------------------------------------------------------------------------------------------------------------------------------------------------------------------------------------------------------------------------------------------------------------------------------------------------------------------------------------------------------------------------------------------------------------------------------------------------------------------------------------------------------------------------------------------------------------------------------------|
| Journal:                      | <i>BMJ Open</i>                                                                                                                                                                                                                                                                                                                                                                                                                                                                                                                                                                                                                                                                                                                                                                                                                                                                                                                                                                                                                                                                                                                                                                                                                                                                                                                                                                                                                                                                                                                                                                                                                                                                                                                                                                                                                                                                                                                                                                                                                                                                                                                                                              |
| Manuscript ID                 | bmjopen-2023-075429.R1                                                                                                                                                                                                                                                                                                                                                                                                                                                                                                                                                                                                                                                                                                                                                                                                                                                                                                                                                                                                                                                                                                                                                                                                                                                                                                                                                                                                                                                                                                                                                                                                                                                                                                                                                                                                                                                                                                                                                                                                                                                                                                                                                       |
| Article Type:                 | Protocol                                                                                                                                                                                                                                                                                                                                                                                                                                                                                                                                                                                                                                                                                                                                                                                                                                                                                                                                                                                                                                                                                                                                                                                                                                                                                                                                                                                                                                                                                                                                                                                                                                                                                                                                                                                                                                                                                                                                                                                                                                                                                                                                                                     |
| Date Submitted by the Author: | 07-Aug-2023                                                                                                                                                                                                                                                                                                                                                                                                                                                                                                                                                                                                                                                                                                                                                                                                                                                                                                                                                                                                                                                                                                                                                                                                                                                                                                                                                                                                                                                                                                                                                                                                                                                                                                                                                                                                                                                                                                                                                                                                                                                                                                                                                                  |
| Complete List of Authors:     | <p>Long, Debbie; Queensland University of Technology, School of Nursing; Queensland Children's Hospital, Paediatric Intensive Care Unit<br/> Anderson, Vicki; Murdoch Children's Research Institute, Clinical Sciences; Royal Children's Hospital, Psychology Service<br/> Crossley, Louise; Murdoch Children's Research Institute, Clinical Sciences<br/> Sood, Nikita; Murdoch Children's Research Institute, Clinical Sciences<br/> Charles, Karina; Queensland Children's Hospital, Paediatric Intensive Care Unit; Queensland University of Technology, School of Nursing<br/> MacDonald, Anna; The University of Queensland, Child Health Research Centre<br/> Bora, Samudragupta; University Hospitals Rainbow Babies &amp; Children's Hospital, Case Western Reserve University School of Medicine; The University of Queensland, Mater Research Institute<br/> Pestell, Carmela; University of Western Australia, School of Psychological Science<br/> Murrell, Kathryn; Starship Children's Hospital<br/> Pride, Natalie; The Children's Hospital at Westmead, Kids Neuroscience Centre<br/> Anderson, Peter; Monash University, Turner Institute for Brain and Mental Health<br/> Badawi, Nadia; The Children's Hospital at Westmead, Grace Centre for Newborn Care<br/> Rose, Brian; The University of Queensland, Child Health Research Centre; HeartKids Australia Inc, Australian and New Zealand Fontan Advocacy Committee<br/> Baillie, Heidi; The Children's Hospital at Westmead, Paediatric Intensive Care Unit<br/> Masterson, Kate; Royal Children's Hospital, Paediatric Intensive Care Unit; Murdoch Children's Research Institute, Clinical Sciences<br/> Chumbes Flores, Jenipher; Perth Children's Hospital, Paediatric Intensive Care Unit<br/> Sherring, Claire; Starship Children's Hospital, Paediatric Intensive Care Unit<br/> Raman, Sainath; Queensland Children's Hospital, Paediatric Intensive Care Unit; The University of Queensland, Child Health Research Centre<br/> Beca, John; Starship Children's Hospital, Paediatric Intensive Care Unit<br/> Erickson, Simon; Perth Children's Hospital, Paediatric Intensive Care Unit</p> |

|                                 |                                                                                                                                                                                                                                                                                                                                                                                                                                                                                                                                                                                                                                                                                                                                                                                                                                                                                                                                                                                                                                                                                                                                                                                                                                                                                                                                                                                                                                                                                                                                                                                                                                                                                                                                                       |
|---------------------------------|-------------------------------------------------------------------------------------------------------------------------------------------------------------------------------------------------------------------------------------------------------------------------------------------------------------------------------------------------------------------------------------------------------------------------------------------------------------------------------------------------------------------------------------------------------------------------------------------------------------------------------------------------------------------------------------------------------------------------------------------------------------------------------------------------------------------------------------------------------------------------------------------------------------------------------------------------------------------------------------------------------------------------------------------------------------------------------------------------------------------------------------------------------------------------------------------------------------------------------------------------------------------------------------------------------------------------------------------------------------------------------------------------------------------------------------------------------------------------------------------------------------------------------------------------------------------------------------------------------------------------------------------------------------------------------------------------------------------------------------------------------|
|                                 | <p>Festa, Marino; The Children's Hospital at Westmead, Paediatric Intensive Care Unit</p> <p>Anderson, Benjamin; Queensland Children's Hospital, Queensland Paediatric Cardiac Service; The University of Queensland, School of Medicine</p> <p>Venugopal, Prem; Queensland Children's Hospital, Department for Cardiac Surgery; The University of Queensland, School of Medicine</p> <p>Yim, Deane; Perth Children's Hospital, Department of Paediatric Cardiology</p> <p>Andrews, David; Perth Children's Hospital, Department of Cardiothoracic Surgery</p> <p>Cheung, Michael; Royal Children's Hospital, Department of Cardiology; Murdoch Children's Research Institute, Clinical Sciences</p> <p>Brizard, Christian; Royal Children's Hospital, Department of Cardiac Surgery; Murdoch Children's Research Institute, Clinical Sciences</p> <p>Gentles, Thomas; Starship Children's Health, Paediatric and Congenital Cardiac Service; The University of Auckland, Paediatrics, Child and Youth Health</p> <p>Iyengar, Ajay; Starship Children's Hospital, Paediatric and Congenital Cardiac Service; The University of Auckland, Department of Surgery</p> <p>Nicholson, Ian; The Children's Hospital at Westmead, Heart Centre for Children</p> <p>Ayer, Julian; The Children's Hospital at Westmead, Heart Centre for Children</p> <p>Butt, Warwick; Royal Children's Hospital, Paediatric Intensive Care Unit; Murdoch Children's Research Institute, Clinical Sciences</p> <p>Schlapbach, Luregn; The University of Queensland, Child Health Research Centre; University Children's Hospital Zürich, Department of Intensive Care and Neonatology</p> <p>Gibbons, Kristen; The University of Queensland, Child Health Research Centre</p> |
| <b>Primary Subject Heading</b>: | Paediatrics                                                                                                                                                                                                                                                                                                                                                                                                                                                                                                                                                                                                                                                                                                                                                                                                                                                                                                                                                                                                                                                                                                                                                                                                                                                                                                                                                                                                                                                                                                                                                                                                                                                                                                                                           |
| Secondary Subject Heading:      | Cardiovascular medicine, Intensive care                                                                                                                                                                                                                                                                                                                                                                                                                                                                                                                                                                                                                                                                                                                                                                                                                                                                                                                                                                                                                                                                                                                                                                                                                                                                                                                                                                                                                                                                                                                                                                                                                                                                                                               |
| Keywords:                       | Congenital heart disease < CARDIOLOGY, Paediatric intensive & critical care < ANAESTHETICS, Developmental neurology & neurodisability < PAEDIATRICS, Paediatric cardiology < CARDIOLOGY, Paediatric cardiac surgery < PAEDIATRIC SURGERY                                                                                                                                                                                                                                                                                                                                                                                                                                                                                                                                                                                                                                                                                                                                                                                                                                                                                                                                                                                                                                                                                                                                                                                                                                                                                                                                                                                                                                                                                                              |
|                                 |                                                                                                                                                                                                                                                                                                                                                                                                                                                                                                                                                                                                                                                                                                                                                                                                                                                                                                                                                                                                                                                                                                                                                                                                                                                                                                                                                                                                                                                                                                                                                                                                                                                                                                                                                       |

SCHOLARONE™  
Manuscripts

**Title Page:****A Longitudinal Cohort Study Investigating Neurodevelopmental and Socio-emotional Outcomes in School-Entry aged Children after Open Heart Surgery in Australia and New Zealand: The NITRIC Follow-up Study Protocol**

Debbie Long<sup>1,2</sup>, Vicki A Anderson<sup>3,4</sup>, Louise H Crossley<sup>3</sup>, Nikita Tuli Sood<sup>3</sup>, Karina R Charles<sup>1,2</sup>, Anna D MacDonald<sup>5</sup>, Samudragupta Bora<sup>6,7</sup>, Carmela F Pestell<sup>8</sup>, Kathryn Murrell<sup>9</sup>, Natalie Pride<sup>10</sup>, Peter J Anderson<sup>11</sup>, Nadia Badawi<sup>12</sup>, Brian Rose<sup>13,14</sup>, Heidi Baillie<sup>15</sup>, Kate Masterson<sup>3,16</sup>, Jenipher Chumbes Flores<sup>17</sup>, Claire Sherring<sup>18</sup>, Sainath Raman<sup>2,5</sup>, John Beca<sup>18</sup>, Simon Erickson<sup>17</sup>, Marino S Festa<sup>15</sup>, Benjamin W Anderson<sup>19,20</sup>, Prem Venugopal<sup>20,21</sup>, Deane Yim<sup>22</sup>, David Andrew<sup>23</sup>, Michael M H Cheung<sup>24,25</sup>, Christian P Brizard<sup>25,26</sup>, Thomas L Gentles<sup>27,28</sup>, Ajay Iyengar<sup>28,29</sup>, Ian A Nicholson<sup>30</sup>, Julian Ayer<sup>30</sup>, Warwick Butt<sup>3,16</sup>, Luregn J Schlapbach<sup>5,31</sup>, Kristen S Gibbons<sup>5</sup>, and The NITRIC Follow-up Study Group, and The Australian and New Zealand Intensive Care Society (ANZICS) Paediatric Study Group (PSG)

<sup>1</sup> School of Nursing, Centre for Healthcare Transformation, Queensland University of Technology, Kelvin Grove, QLD, Australia

<sup>2</sup> Paediatric Intensive Care Unit, Queensland Children's Hospital, South Brisbane, QLD Australia

<sup>3</sup> Clinical Sciences, Murdoch Children's Research Institute, Parkville, VIC, Australia

<sup>4</sup> Psychology Service, Royal Children's Hospital Melbourne, Parkville, VIC, Australia

<sup>5</sup> Child Health Research Centre, The University of Queensland, Brisbane, QLD, Australia

<sup>6</sup> Department of Pediatrics, University Hospitals Rainbow Babies & Children's Hospital, Case Western Reserve University School of Medicine, Cleveland, OH, United States

1  
2  
3 <sup>7</sup> Mater Research Institute, Faculty of Medicine, The University of Queensland, Brisbane,  
4  
5 QLD, Australia

6  
7 <sup>8</sup> School of Psychological Science, University of Western Australia, Crawley, WA, Australia

8  
9 <sup>9</sup> Starship Children's Hospital, Auckland, New Zealand

10  
11 <sup>10</sup> Kids Neuroscience Centre, The Children's Hospital at Westmead, Westmead, NSW,  
12  
13 Australia

14  
15  
16 <sup>11</sup> Turner Institute for Brain and Mental Health, School of Psychological Sciences, Monash  
17  
18 University, Clayton, VIC, Australia

19  
20  
21 <sup>12</sup> Grace Centre for Newborn Care, The Children's Hospital at Westmead, Westmead, NSW,  
22  
23 Australia

24  
25  
26 <sup>13</sup> Consumer Representative, Child Health Research Centre, The University of Queensland,  
27  
28 South Brisbane, QLD, Australia

29  
30  
31 <sup>14</sup> Australian and New Zealand Fontan Advocacy Committee, HeartKids Ltd, Sydney, NSW,  
32  
33 Australia

34  
35  
36 <sup>15</sup> Paediatric Intensive Care Unit, The Children's Hospital at Westmead, Westmead, NSW,  
37  
38 Australia

39  
40 <sup>16</sup> Paediatric Intensive Care Unit, Royal Children's Hospital, Parkville, VIC, Australia

41  
42 <sup>17</sup> Paediatric Intensive Care Unit, Perth Children's Hospital, Nedlands, WA, Australia

43  
44 <sup>18</sup> Paediatric Intensive Care Unit, Starship Children's Hospital, Auckland, New Zealand

45  
46  
47 <sup>19</sup> Queensland Paediatric Cardiac Service, Children's Health Queensland Hospital and Health  
48  
49 Service, South Brisbane, QLD, Australia

50  
51 <sup>20</sup> School of Medicine, The University of Queensland, South Brisbane, QLD, Australia

52  
53  
54 <sup>21</sup> Department for Cardiac Surgery, Queensland Children's Hospital, Brisbane, QLD,  
55  
56 Australia

57  
58 <sup>22</sup> Department of Paediatric Cardiology, Perth Children's Hospital, Nedlands, WA, Australia

59  
60 <sup>23</sup> Department of Cardiothoracic Surgery, Perth Children's Hospital, Nedlands, WA, Australia

1  
2  
3 <sup>24</sup> Department of Cardiology, Royal Children's Hospital, Parkville, VIC, Australia

4  
5 <sup>25</sup> Murdoch Children's Research Institute, Parkville, VIC, Australia

6  
7 <sup>26</sup> Department of Cardiac Surgery, Royal Children's Hospital, Parkville, VIC, Australia

8  
9  
10 <sup>27</sup> Paediatric and Congenital Cardiac Service, Starship Children's Hospital, Auckland, New  
11 Zealand

12  
13  
14 <sup>28</sup> Paediatrics, Child and Youth Health, University of Auckland, Auckland, New Zealand

15  
16  
17 <sup>29</sup> Department of Surgery, University of Auckland, Auckland, New Zealand

18  
19  
20 <sup>30</sup> Heart Centre for Children, The Children's Hospital at Westmead, Westmead, NSW,  
21 Australia

22  
23  
24 <sup>31</sup> Department of Intensive Care and Neonatology, Children's Research Centre, University  
25 Children's Hospital Zurich, Zurich, Switzerland

### 26 27 28 29 30 **The NITRIC Follow-up Study Group**

31  
32 Kristen S Gibbons, Luregn J Schlapbach, Samudragupta Bora, Devika Ganesamoorthy, Anna  
33 D MacDonald, Antje Blumenthal, Trang M T Pham, Endrias Ergetu, The University of  
34 Queensland, Brisbane, Australia; Debbie Long, Queensland University of Technology,  
35 Brisbane, Australia; Sainath Raman, Karina R Charles, Prem Venugopal, Benjamin W  
36 Anderson, Queensland Children's Hospital, Brisbane, Australia; Warwick Butt, Vicki A  
37 Anderson, Kate Masterson, Jenni Braeutigam, Michael M H Cheung, Christian P Brizard,  
38 Royal Children's Hospital, Melbourne, Australia; Peter J Anderson, Monash University,  
39 Melbourne, Australia; Lachlan Coin, University of Melbourne, Melbourne, Australia; Simon  
40 Erickson, Carmela F Pestell, Jenipher Chumbes Flores, Deane Yim, David Andrews, Perth  
41 Children's Hospital, Perth, Australia; Marino S Festa, Nadia Badawi, Natalie Pride, Heidi  
42 Baillie, Jennifer Darvas, Ian A Nicholson, Julian Ayer, The Children's Hospital at Westmead,  
43 Sydney, Australia; John Beca, Kathryn Murrell, Laura Brown, Claire Sherring, Shelley  
44  
45  
46  
47  
48  
49  
50  
51  
52  
53  
54  
55  
56  
57  
58  
59  
60

1  
2  
3 Coetzer, Thomas L Gentles, Ajay Iyengar, Starship Children's Hospital, Auckland, New  
4  
5 Zealand; and Brian Rose, Holly Williams, Consumer Representatives.  
6  
7  
8

9  
10 **The ANZICS PSG**

11 Breanna Pellegrini, Australian and New Zealand Paediatric Intensive Care Registry; Shane  
12  
13 George, Gold Coast University Hospital, Gold Coast, Australia; Corrine Balit, John Hunter  
14  
15 Hospital, Newcastle, Australia; Felix Oberender, Monash Children's Hospital, Melbourne,  
16  
17 Australia; Simon Erickson, Jenipher Chumbes Flores, Perth Children's Hospital, Perth,  
18  
19 Australia; Karina Charles, Sainath Raman, Michaela Waak, Queensland Children's Hospital,  
20  
21 Brisbane, Australia; Debbie Long, Queensland University of Technology, Brisbane,  
22  
23 Australia; Warwick Butt (Chair), Carmel Delzoppo, Ben Gelbart, Kate Masterson, Johnny  
24  
25 Millar, Royal Children's Hospital, Melbourne, Australia; Anusha Ganeshalingam, Claire  
26  
27 Sherring, Starship Children's Hospital, Auckland, New Zealand; Puneet Singh, Vicky Smith,  
28  
29 Sydney Children's Hospital, Randwick, Australia; Kristen Gibbons, Luregn Schlapbach (Past  
30  
31 Chair), Jessica Schults, The University of Queensland, Brisbane, Australia; and Jennifer  
32  
33 Darvas, Marino Festa, The Children's Hospital at Westmead, Sydney, Australia.  
34  
35  
36  
37  
38  
39  
40  
41

42 **Corresponding Author:**

43 A/Prof Kristen Gibbons, PhD

44 Child Health Research Centre, The University of Queensland

45  
46  
47  
48 62 Graham St, South Brisbane, Queensland, 4101, Australia

49  
50  
51 Email: [k.gibbons@uq.edu.au](mailto:k.gibbons@uq.edu.au); Phone: +61 407 966 708  
52  
53  
54

55 **Competing Interests Statement:**

56  
57  
58 None declared.  
59  
60



1  
2  
3 **Key words:** child; congenital heart disease; cognition; behavior; neurodevelopment;  
4 trajectories; phenotype; preschool; school readiness; screening; latent effects  
5  
6  
7  
8

9 **Funding:** This work is supported by grants from the Medical Research Future Fund  
10 (ARGCHDG000036), Australia; the Children's Hospital Foundation, Australia; the Starship  
11 Foundation (SF4226), New Zealand; and the Green Lane Research and Educational Fund  
12 Foundation (SF4226), New Zealand; and the Green Lane Research and Educational Fund  
13 Foundation (SF4226), New Zealand; and the Green Lane Research and Educational Fund  
14 Foundation (SF4226), New Zealand. VA is supported by a National Health and Medical Research  
15 Foundation (21/22/4158), New Zealand. VA is supported by a National Health and Medical Research  
16 Council (Australia) Investigator Grant. The funding sources were not involved in study design,  
17 analyses, nor interpretation of the results.  
18  
19  
20  
21  
22  
23  
24

25 **Word Count:** 3571  
26  
27  
28  
29  
30  
31  
32  
33  
34  
35  
36  
37  
38  
39  
40  
41  
42  
43  
44  
45  
46  
47  
48  
49  
50  
51  
52  
53  
54  
55  
56  
57  
58  
59  
60

## Abstract

**Introduction:** Despite growing awareness of neurodevelopmental impairments in children with congenital heart disease (CHD), there is a lack of large, longitudinal, population-based cohorts. Little is known about the contemporary neurodevelopmental profile and the emergence of specific impairments in children with CHD entering school. The performance of standardized screening tools to predict neurodevelopmental outcomes at school age in this high-risk population remains poorly understood. The NITric oxide during cardiopulmonary bypass to improve Recovery in Infants with Congenital heart defects (NITRIC) trial randomized 1371 children <2 years of age, investigating the effect of gaseous nitric oxide applied into the cardiopulmonary bypass oxygenator during heart surgery. The NITRIC Follow-Up Study will follow this cohort annually until 5 years of age to assess outcomes related to cognition and socioemotional behavior at school entry, identify risk factors for adverse outcomes, and evaluate the performance of screening tools.

**Methods and analysis:** Approximately 1150 children from the NITRIC trial across 5 sites in Australia and New Zealand will be eligible. Follow-up assessments will occur in two stages: i) annual online screening of global neurodevelopment, socioemotional and executive functioning, health-related quality of life and parenting stress at ages 2-5 years; and ii) face-to-face assessment at age 5 years assessing intellectual ability, attention, memory, and processing speed; fine motor skills; language and communication; and socioemotional outcomes. Cognitive and socioemotional outcomes and trajectories of neurodevelopment will be described and demographic, clinical, genetic and environmental predictors of these outcomes will be explored.

**Ethics and dissemination:** Ethical approval has been obtained from the Children's Health Queensland (HREC/20/QCHQ/70626) and New Zealand Health and Disability (21/NTA/83)

1  
2  
3 Research Ethics Committees. The findings will inform the development of clinical decision  
4  
5 tools and improve preventative and intervention strategies in children with CHD.  
6  
7 Dissemination of the outcomes of the study is expected via publications in peer-reviewed  
8  
9 journals, presentation at conferences, via social media, podcast presentations and medical  
10  
11 education resources, and through CHD family partners.  
12  
13  
14  
15

16 **Registration details:** The trial was prospectively registered with the Australian New Zealand  
17  
18 Clinical Trials Registry as “Gene Expression to Predict Long-Term Neurodevelopmental  
19  
20 Outcome in Infants from the NITric oxide during cardiopulmonary bypass to improve  
21  
22 Recovery in Infants with Congenital heart defects (NITRIC) Study – A Multicentre Prospective  
23  
24 Trial.” Trial Registration: ACTRN12621000904875  
25  
26  
27  
28  
29  
30  
31  
32  
33  
34  
35  
36  
37  
38  
39  
40  
41  
42  
43  
44  
45  
46  
47  
48  
49  
50  
51  
52  
53  
54  
55  
56  
57  
58  
59  
60

## ARTICLE SUMMARY

### Strengths and Limitations of this Study

- The use of a longitudinal cohort design based on a large high-quality pragmatic trial with broad inclusion criteria to map neurodevelopmental outcomes will help to improve prediction and early identification of children at risk for poor outcomes following cardiopulmonary bypass surgery for congenital heart disease.
- The NITRIC Follow-Up Study data will be combined with prospective well characterized datasets on clinical, socioeconomic, and biological variables, including multi-omics obtained pre and post CPB.
- CHD families, clinicians and other stakeholders have co-designed the NITRIC Follow-Up sStudy methods, ensuring the project is meaningful to CHD families and has the potential to optimise neurodevelopment in children following open heart surgery
- Limitations of this study are the sensitivity to loss to follow-up of participants and potential variations in follow-up timings.

## INTRODUCTION

One out of every 200 children is born with congenital heart disease (CHD) requiring surgery during childhood. Over the past two decades considerable improvements have been achieved in relation to survival following pediatric cardiac surgery, resulting in decreasing mortality rates for most lesions (1-3). Correspondingly, the number of children surviving with CHD has been rapidly increasing with a rising proportion of complex CHD. The burden and cost of physical and neurological morbidities in CHD survivors are forecast to represent a major challenge for healthcare systems in the coming decades (4).

Neurodevelopmental disabilities remain amongst the most common, and the most serious, sequelae in children undergoing surgery for CHD (5). These can manifest as cognitive impairment, speech and language difficulties, visuo-spatial and visuo-motor challenges, attention deficits, motor delays, socioemotional problems, secondary learning disabilities and reduced quality of life (QoL) (6, 7). Early post-operative assessment after infant surgery often reveals abnormalities in muscle tone, poor suck and swallow, and feeding difficulties (8, 9). However, developmental milestones show wide variation, with distinction between children with delayed development who will 'catch-up' to their peers and those who will experience persistent impairments remaining a major challenge (10, 11). The full extent of neurodevelopmental sequelae may only manifest once children reach school age (11, 12). If not detected and managed early, these sequelae may translate into secondary academic problems and reduced quality of life, with long-lasting consequences for the patient, family, future offspring, and society. Furthermore, these represent a major contributor to excessive longer-term health costs, which are usually unaccounted for in health economic models (13). To optimise outcomes for all children with CHD, early identification and appropriate supportive and/or rehabilitative management of children at risk for neurodevelopmental difficulties are essential. Historically, neurodevelopmental studies in other at-risk populations,

1  
2 such as preterm infants, have focused on the detection of moderate to severe impairment (e.g.,  
3 cerebral palsy, blindness, deafness) (14). An evolving landscape now acknowledges the  
4 importance of more subtle outcomes, including milder degrees of impairment which will have  
5 a significant influence on everyday functioning and quality of life (15). In particular, two recent  
6 systematic reviews have demonstrated consistent evidence for executive function impairment  
7 in school-aged children with CHD, underscoring the lifelong impact of CHD and the need for  
8 follow-up (16, 17). Despite the median age at follow-up in these papers being closer to high  
9 school age, the American Heart Association guidelines recommend starting screening for  
10 executive function at 6 years of age (18). Moreover, problems may present prior to formal  
11 schooling, therefore earlier screening may be beneficial. Executive functions begin to emerge  
12 during infancy and are core skills critical for the life-course, including success in school and in  
13 life.  
14  
15  
16  
17  
18  
19  
20  
21  
22  
23  
24  
25  
26  
27  
28  
29  
30  
31

32 Over the last decade, research has identified a range of neurodevelopmental impairments in  
33 children with CHD and, at the same time, highlighted some distinct CHD outcome patterns.  
34 Whilst the prevalence of severe cognitive impairment in children with CHD has declined,  
35 deficits in multiple cognitive and psychosocial domains are increasingly observed (19-21).  
36 Several studies have shown that even children whose intelligence quotient falls within the  
37 normal range may exhibit pervasive but subtle neuropsychological weaknesses, which are often  
38 underestimated or go undetected (22-25). Emerging data show that, while severity of CHD is  
39 associated with outcome, patients with both univentricular and biventricular surgeries  
40 demonstrate variable neurodevelopmental outcomes (20, 26). These impairments in children  
41 with CHD are important indicators of school readiness, with increasing awareness of the need  
42 to obtain an adequate developmental assessment before school entry so that education, family  
43 and child supports can be put into place to optimise outcomes. In addition to events surrounding  
44 cardiac surgery, research increasingly demonstrates that prenatal, patient-specific and  
45  
46  
47  
48  
49  
50  
51  
52  
53  
54  
55  
56  
57  
58  
59  
60

1  
2  
3 environmental factors, including socioeconomic status, play a large role in determining the  
4  
5 outcomes of children with CHD (21, 27) and may contribute to identifying those at risk for  
6  
7 poor neurodevelopmental outcomes.  
8  
9

10  
11 In order to design and evaluate strategies which can mitigate the impact of CHD on  
12  
13 neurocognitive outcomes, a better understanding of the risk factors and contemporary  
14  
15 trajectories in these patients is urgently needed. At present, it remains unclear which tools, at  
16  
17 which specific time points, have the best performance to predict child outcomes at school entry  
18  
19 (28). The Cardiac Neurodevelopmental Outcome Collaborative (CNOC), an international  
20  
21 multidisciplinary group committed to optimizing neurodevelopmental outcomes for children  
22  
23 with CHD, has recently recommended for future research to prioritize longitudinal trajectories  
24  
25 of CHD, designed to identify socioemotional phenotypes and evaluate the effects of early risk  
26  
27 factors on later outcomes including clinical, genetic, socioeconomic, sex and ethnic factors  
28  
29 (29). Such a nuanced characterisation of CHD will require adequately powered, large,  
30  
31 contemporary, longitudinal cohorts representative of the CHD population with a high  
32  
33 granularity of clinical and follow-up data.  
34  
35  
36  
37  
38  
39  
40

41  
42 Between 2017 and 2021, the NITric oxide during cardiopulmonary bypass to improve  
43  
44 Recovery in Infants with Congenital heart defects (NITRIC) trial recruited 1371 infants less  
45  
46 than 2 years of age undergoing CPB surgery and represents the largest randomized controlled  
47  
48 trial (RCT) in the field of CHD to date. This RCT evaluated if the addition of nitric oxide into  
49  
50 the CPB oxygenator would result in more ventilator-free days compared to standard CPB. The  
51  
52 protocol (30), analysis plan (31) and 28-day outcomes (32) of this study have been reported  
53  
54 previously. The NITRIC trial represents a unique population-based and well characterized  
55  
56 large contemporary cohort of CHD children undergoing CPB. The NITRIC Follow-Up Study  
57  
58 has been designed to follow-up the NITRIC trial cohort to address significant gaps in  
59  
60

1  
2  
3 knowledge of neurodevelopmental outcomes associated with CHD as children approach school  
4  
5 age, and to explore associations of outcome with the host response to CPB assessed by  
6  
7 transcriptomics and other biochemical markers. Below we describe the protocol to follow up  
8  
9 the NITRIC trial cohort from 2 to 5 years of age.  
10  
11  
12  
13

## 14 **Aims**

15  
16 The primary objective of the NITRIC Follow-Up Study is to improve the prediction and early  
17  
18 identification of children at risk for poor developmental outcomes following CPB surgery for  
19  
20 CHD, using a comprehensive protocol of age-appropriate standardized assessments. The study  
21  
22 has four aims:  
23  
24

- 25 1. Map the neurodevelopmental, executive function and socioemotional trajectories  
26 following CPB surgery for CHD from 2 to 5 years of age.  
27
- 28 2. Explore CHD neurodevelopmental and socioemotional phenotypes at 5 years.  
29
- 30 3. Determine whether neurodevelopmental screening from 2 to 5 years of age predicts  
31 outcomes for children with CHD once they reach school age.  
32
- 33 4. Identify sociodemographic, parent, child, disease, biochemical, and treatment factors  
34 that differentiate neurodevelopmental and socioemotional outcomes following CPB  
35 surgery.  
36  
37  
38  
39  
40  
41  
42  
43  
44  
45

## 46 **METHODS AND ANALYSIS**

### 47 **Study Design**

48  
49 This is a prospective multicenter, international, longitudinal follow-up study of the NITRIC  
50  
51 trial cohort. The results of this study will be reported according to the Strengthening the  
52  
53 Reporting of Observational Studies in Epidemiology (STROBE) checklist (33) or respective  
54  
55 reporting guidelines for specific nested studies.  
56  
57  
58  
59  
60



## Participants

Children who underwent CPB surgery for CHD prior to 2 years of age and participated in the NITRIC trial (32). Children were recruited prior to surgery from six tertiary pediatric hospitals in Australia, New Zealand and the Netherlands between 2017 and 2021. In the NITRIC Follow-Up Study, we anticipate that 1150 surviving children from Australian and New Zealand sites will be eligible to participate. Children from the Netherlands may be included in future iterations of this protocol.

## Recruitment Procedure

Parents of eligible children will be invited to participate in annual online assessments from 2 (2 years 0 months) to 5 years (5 years 11 months) of age. Due to the variation in age at recruitment (0 to 2 years) and the four-year conduct of the original NITRIC trial, some children may participate in as few as one, and others in as many as four, annual assessments. Following annual assessment at age 5, families will be asked to have their child participate in a face-to-face comprehensive neurodevelopmental assessment, and parents will complete a battery of questionnaires. Acknowledging a small number of children may have already turned 5 at study commencement, to ensure inclusiveness we will allow the 5 year online and face-to-face assessments to occur in children up to 6 years 11 months.

Prior to the initial contact, site research coordinators will review patient records to ensure the child is not deceased, and then provide eligible families with information about the NITRIC Follow-Up Study and a link to an informational video (<https://www.nitricfollowup.com/>). Coordinators will contact parents who indicate willingness to participate to further explain the study. Consent for completion of each annual questionnaire will be implied on return of the questionnaire. Parents will be contacted to verbally reconfirm their willingness to participate

1  
2 at each annual timepoint. Parents will be asked to provide written consent for the face-to-face  
3  
4 neurodevelopmental assessment.  
5  
6  
7  
8

## 9 **Measures**

### 10 *Demographic and clinical information*

11  
12 At their first annual online screening, parents will complete a study-specific demographic  
13  
14 survey which includes sex, age, ethnicity, highest education, living arrangements, relationship  
15  
16 status, number of children in their care and languages spoken. Each subsequent annual  
17  
18 questionnaire will ask parents to document any changes in demographic status. Socio-  
19  
20 economic status will be determined using the Socio-Economic Indexes for Areas – Index of  
21  
22 Relative Socio-economic Disadvantage (SEIFA IRSD) deciles and The New Zealand Index of  
23  
24 Deprivation (NZDep) derived from the postcode recorded at PICU admission (34, 35).  
25  
26 Postcode will also be used to determine regionality, using the Australian Bureau of Statistics'  
27  
28 5 classes of remoteness (Accessibility and Remoteness Index of Australia [ARIA]) and the  
29  
30 Statistics New Zealand Urban Rural 2018 Classification (36, 37). Clinical information  
31  
32 pertaining to the child's surgery and PICU admission has been recorded prospectively as part  
33  
34 of the NITRIC study and includes diagnosis, CPB and surgical characteristics, severity, and  
35  
36 treatments in PICU, and PICU and hospital length of stay.  
37  
38  
39  
40  
41  
42  
43  
44  
45

### 46 *Follow-up Assessments*

47  
48 The annual screening questionnaire and the face-to-face follow-up were designed in  
49  
50 consultation with the multidisciplinary study team, considering measure's reliability and  
51  
52 validity, relevance to the CHD literature (38) and subsequent discussion with CHD family  
53  
54 representatives.  
55  
56  
57  
58  
59  
60

1  
2  
3 *Annual online screening:* Parents will be contacted annually until the child's fifth birthday to  
4 complete the online screening questionnaire (telephone, tablet, laptop, computer) using a  
5 secure link to their electronic questionnaire and contact details of their recruiting site. The  
6 questionnaire will be individualized based on each child's chronological age and development  
7 as per the respective tool. One questionnaire will be completed per child by a primary caregiver.  
8  
9 The questionnaire takes approximately 45-60 minutes to complete and can be completed over  
10 several periods by returning to the saved questionnaire. In the case of parent comorbidity or  
11 circumstances limiting completion of the annual online screen, questionnaires will be  
12 administered via telephone interview by the research coordinator. Unless parents notify of their  
13 withdrawal from the study, attempts will be made to contact parents each year, even if the  
14 previous year's assessment was lost to follow-up. Supplemental Table S1 details the  
15 questionnaires included in annual screening assessments to be completed by parents. These  
16 measures assess child neurodevelopment, socioemotional status, quality of life, parent  
17 emotional well-being and parenting stress. We will also collect health service utilisation data,  
18 and any other major illnesses or surgery in the previous 12 months, via a study-specific survey.  
19  
20  
21  
22  
23  
24  
25  
26  
27  
28  
29  
30  
31  
32  
33  
34  
35  
36  
37  
38

39 *Face-to-face neuropsychological assessment:* Following the child's fifth birthday, a face-to-  
40 face child assessment will also be conducted. Parents will be asked to provide written consent  
41 to participate in this component of the study and an assessment appointment will be scheduled.  
42 Assessments will be conducted in outpatient clinics at recruiting sites or alternative sites to suit  
43 families. The face-to-face assessment will take 2-3 hours and will be divided into several  
44 sessions, with breaks according to the individual child's needs based on best  
45 neuropsychological practice. Order of assessment will be set, with the intellectual ability  
46 (Wechsler Preschool & Primary Scale of Intelligence) tool administered first. Missing data  
47 (due to child or parent disability or lack of cooperation) will be recorded and categorized.  
48 Supplemental Table S2 details the face-to-face test battery which focuses on direct assessment  
49  
50  
51  
52  
53  
54  
55  
56  
57  
58  
59  
60

1  
2  
3 of children's overall intellectual ability (IQ) and targets cognitive domains vulnerable to early  
4  
5 childhood brain insult including attention, language, memory, motor skills, and executive  
6  
7 function. Parents will also rate their child's adaptive ability, socioemotional function, fatigue  
8  
9 and parent-child attachment.  
10

## 11 12 13 14 **Sample Size**

15  
16 The sample size is determined by the existing cohort. Of the 1371 recruited participants for the  
17  
18 NITRIC trial, seven did not ultimately undergo CPB surgery, 82 were recruited in The  
19  
20 Netherlands, and 44 children are known to be deceased by day 28 post-surgery. Based on  
21  
22 available literature on long-term mortality in infants with CHD (39), we estimate that 1150  
23  
24 children will be eligible for inclusion in the NITRIC Follow-Up Study. Based on our previous  
25  
26 experience and published reports of other follow-up cohorts (40, 41), we aim for an overall  
27  
28 follow-up rate of 70% (n= 805) at the 5-year face-to-face assessment.  
29  
30  
31  
32  
33  
34

## 35 **Data Analysis**

### 36 *Cohort Description*

37  
38 Characteristics of the cohort will be presented descriptively, including comparison between  
39  
40 responders and non-responders to assess potential bias.  
41  
42  
43  
44  
45

### 46 *Outcomes*

47  
48 The outcomes for each of the assessments (Supplemental Tables S1 and S2) will be presented  
49  
50 at each timepoint with the point estimate and measure of variation. In addition to continuous  
51  
52 outcome measures, secondary analyses will use cut-offs to categorize outcomes. Comparison  
53  
54 of outcomes against appropriate normative values will be undertaken.  
55  
56  
57  
58  
59

### 60 *Developmental Trajectories*

1  
2  
3  
4  
5  
6  
7  
8  
9  
10  
11  
12  
13  
14  
15  
16  
17  
18  
19  
20  
21  
22  
23  
24  
25  
26  
27  
28  
29  
30  
31  
32  
33  
34  
35  
36  
37  
38  
39  
40  
41  
42  
43  
44  
45  
46  
47  
48  
49  
50  
51  
52  
53  
54  
55  
56  
57  
58  
59  
60

Growth mixture models will be developed to investigate different post-surgery developmental profiles using data from the annual screening (Ages and Stages Questionnaire [ASQ] Total Score, Strengths and Difficulties Questionnaire [SDQ] Total Difficulties Score, and Behavior Rating Inventory for Executive Function for Pre-schoolers [BRIEF-P] Global Executive Composite Score) at 2, 3, 4, and 5 years of age. Child, parent, surgical, PICU treatment and sociodemographic factors known at the time of surgery, and collected during the NITRIC RCT, will be added to the model as covariates. Previous experience has demonstrated that variables from the NITRIC RCT have minimal missing data, however when missing data is evident, multiple imputation methods will be used for covariate data. The data will be explored graphically to determine the functional form, and a series of models will be developed and compared using the chi-squared difference tests (nested models) or another criterion (such as the Bayesian information criterion for non-nested models) to identify the number of trajectories.

#### *Derivation of Neurodevelopmental and Socioemotional Phenotypes*

To derive neurodevelopmental and socioemotional phenotypes at 5 years of age, the cohort will firstly be split into derivation and validation subsets (65:35 using a temporal split). We will ensure the subsets are balanced for the original intervention in the NITRIC trial to avoid bias by intervention, as well as the original NITRIC trial stratification variables (age group and cardiac pathophysiology). Outcomes from the assessments undertaken at 5 years of age (listed in Supplemental Table S2) will be used to derive neurodevelopmental and socioemotional phenotypes. These will include the language, attention, executive functioning, and memory, and social behavior and functioning domains. As such, the cohort will be restricted to children who have completed at least one assessment at the 5 years face-to-face visit. Where children have not completed the full assessment, multiple imputation will be used to impute missing outcome data. Descriptive analysis will firstly be performed to assess missingness, correlation

1  
2 and distribution, and to identify highly correlated outcomes. If two outcomes are highly  
3 correlated ( $r > 0.8$ ), only one will be retained in the clustering analysis to avoid redundancy.  
4  
5 Due to the potential for missing outcome data, multiple imputed datasets will be generated, and  
6  
7  $k$ -means clustering undertaken on each to assess stability. Standard indices will be used to  
8  
9 identify the optimal number of phenotypes (e.g., Silhouette index, Gap index, Dunn index),  
10  
11 and one set of phenotypes from the multiple imputed datasets used for the remaining analyses.  
12  
13 Graphical methods will be used to describe and visualize the composition of the phenotypes.  
14  
15 Latent class analysis will then be used to assess the reproducibility of the phenotypes within  
16  
17 the entire dataset.  
18  
19  
20  
21  
22  
23  
24

### 25 *Structural Equation Modelling*

26  
27 Structural equation modelling (SEM) will be used to examine the associations between the  
28  
29 neurodevelopmental screening outcomes from 2 to 5 years of age and neurodevelopmental  
30  
31 outcomes for children with CHD once they reach school age. Specifically, longitudinal panel  
32  
33 models will be developed to assess the continuity of the neurodevelopmental outcomes from 2  
34  
35 to 5 years, as well as their association with the neurodevelopmental outcomes assessed at aged  
36  
37 five. Missing data patterns will be explored and full information maximum likelihood  
38  
39 estimation methods will be used to produce unbiased parameter estimates in the presence of  
40  
41 missing data.  
42  
43  
44  
45  
46  
47

### 48 *Prediction Models*

49  
50 Mixed-effects models will be developed to investigate which individual, parent, surgical, PICU  
51  
52 treatment and sociodemographic factors known at the time of surgery are associated with both  
53  
54 neurodevelopmental and socioemotional outcomes, and derived phenotypes. The models will  
55  
56 account for risk factors for cognitive delays (identified through existing literature and clinical  
57  
58  
59  
60

1  
2  
3 judgement), the original NITRIC trial intervention and stratification variables (as fixed effects),  
4  
5 and study site (random effect).  
6  
7  
8

9  
10 In addition to the exploration of the impact of clinical and sociodemographic factors on  
11  
12 neurodevelopmental outcome, prediction models will be developed incorporating biomarkers  
13  
14 of host response to CPB. Transcriptomics data will be generated on the full cohort with  
15  
16 matched pre- and post-surgery samples and metabolomics data and proteomics data will be  
17  
18 generated on subset of cohort. We will use forward selection algorithms to identify variables  
19  
20 from each data set to discover novel biomarkers to predict patient outcomes after CPB. We will  
21  
22 also combine these datasets to derive a combination biomarker (including gene expression,  
23  
24 metabolites and proteins) to predict short-term and long-term patient outcomes.  
25  
26  
27  
28  
29

### 30 **Feasibility and Engagement**

31  
32 To maximize follow-up rates, we have developed detailed standardized training on a follow-  
33  
34 up delivery package for the study informed by published reports (42-45) including the  
35  
36 collection of detailed contact information, using systematic methods for patient contact,  
37  
38 visit/appointment scheduling and cohort retention monitoring (templates for telephone scripts  
39  
40 and written material); log of each contact attempt made to participants; providing reminders  
41  
42 about visits/appointments; providing benefits to children and families that are directly related  
43  
44 to the nature of the study (e.g. reports which can be shared with educators or healthcare  
45  
46 professionals); providing reimbursement for direct research-related expenses such as travel and  
47  
48 accommodation to facilitate participation; providing tokens of appreciation (developed in  
49  
50 consultation with family group); and procedures for escalating efforts to reach participants  
51  
52 (46), including varying contact modes and reminders.  
53  
54  
55  
56  
57  
58  
59  
60

#### *Assessment feedback for participants*

1  
2  
3 All parents will receive written results of their child's development from both the annual and  
4  
5 face-to-face assessments in a formal report. The annual report results will be articulated in  
6  
7 terms of performance ranges (i.e. within/below the range as same-aged peers) for each  
8  
9 assessment and emailed to parents at the completion of the online assessment. The report  
10  
11 includes a summary of the areas of development assessed and a guide for interpreting the  
12  
13 results. The face-to-face report will include an explanation of the areas assessed and will report  
14  
15 on each domain area, which will be summarized as below average, average or above average  
16  
17 for cognitive profiles and average or elevated for socioemotional profiles. If the assessment  
18  
19 results raise areas of concern not previously identified/diagnosed, parents are encouraged to  
20  
21 contact their primary healthcare providers to discuss the findings and options for referral to  
22  
23 appropriate services for further clinical neuropsychological testing as indicated. Reports have  
24  
25 been developed in consultation with the CHD family group.  
26  
27  
28  
29  
30  
31

### 32 **Patient and Public Involvement**

34  
35 The development of the research questions and outcome measures are based on the findings of  
36  
37 our previous research into long-term outcomes in critically ill cohorts (30, 47, 48). The  
38  
39 importance of long-term outcomes has been investigated by members of the research team  
40  
41 through national and international research (49, 50). Prior to study commencement, there has  
42  
43 been direct involvement of CHD families with lived experience in the development of study  
44  
45 materials, including the formal annual reports and further interviews and focus groups  
46  
47 exploring engagement in research, which will be published separately. CHD families have  
48  
49 assessed the burden of the follow-up questionnaires, the suitability of domains measured and  
50  
51 the acceptability of the annual report. Families will also advise on the dissemination strategy,  
52  
53 particularly in relation to participating families and community groups.  
54  
55  
56  
57  
58  
59  
60

### **Limitations**



1  
2  
3 This study has potential limitations. Firstly, cohort studies are sensitive to loss to follow-up of  
4 the participants. To address this, we have formulated a comprehensive follow-up quality  
5 control plan prior to study commencement and will explore patterns of lost to follow-up  
6 through sensitivity analyses. Provision of reports may also encourage parents to seek additional  
7 early support and intervention for their child, thus potentially changing the trajectory of  
8 outcomes (albeit positively); hence the collection of healthcare utilization data is an important  
9 inclusion in this study. Follow-up timing may range amongst participants; therefore we will  
10 include age at completion of assessments in statistical modelling.  
11  
12  
13  
14  
15  
16  
17  
18  
19  
20  
21  
22

### 23 **Contribution**

24  
25 This study also offers several strengths. First, the cohort is based on a large high-quality  
26 pragmatic trial with broad inclusion criteria offering approximation for population-based  
27 coverage, which is representative of the contemporary CHD population. Second, follow-up  
28 data will be combined with the prospective well characterized datasets on clinical,  
29 socioeconomic, and biological variables, including multi-omics obtained pre- and post-CPB.  
30 Furthermore, this cohort allows for exploring which sociodemographic variables predict  
31 neurodevelopment in a large binational cohort. This will enable us to control for their potential  
32 confounding effects on the association between risk factors and neurodevelopmental outcomes.  
33  
34 By integrating neurodevelopmental, socioemotional, functional and quality of life measures,  
35 we will undertake the largest population-based follow-up cohort of infants undergoing CPB  
36 for CHD and collect extensive patient- and family-centered outcomes between 2 and 5 years  
37 of age. Through the combination with biochemical data obtained pre- and post-CPB, the  
38 program will seek to unravel links between early host response to CPB and late outcomes. As  
39 a result, this study will assist us in identify the most informative time points and predictors to  
40 detect problems and the functions that are most at risk of impairment for these children.  
41  
42  
43  
44  
45  
46  
47  
48  
49  
50  
51  
52  
53  
54  
55  
56  
57  
58  
59  
60

## Data Management

A purpose-built REDCap™ database has been developed (hosted by The University of Queensland) to store participant information, administer annual assessments in survey form, and record outcomes of the face-to-face neuropsychological assessment. In-built dashboards have been developed to enable centralized, and site monitoring of recruitment and survey completion rates. Following principles of the International Council of Harmonisation, Good Clinical Practice (ICH-GCP) guidelines, a risk-based assessment has been undertaken to guide the development of the study monitoring plan.

## Study Oversight

A Steering Group has been established with clinical, long-term follow-up, data, consumer and research coordination representatives, and has oversight of the progress of the study, supported by a Research and Operations Manager. Whole program meetings will be convened during the study to update all program members on the progress of the study.

## Ethical Considerations

The study protocol has been approved by the Children's Health Queensland Human Research Ethics Committee (HREC/20/QCHQ/70626; original submission approved 21<sup>st</sup> December 2020) and New Zealand Health and Disability Ethics Committee (21/NTA/83; original submission approved 6<sup>th</sup> September 2021). Recruitment commenced on May 10<sup>th</sup>, 2022.

## Dissemination of Results

Participants will be given the option to receive a summary of results at the completion of the study, in addition to the ongoing feedback provided from the outcomes of the annual screening questionnaires and face-to-face assessments. Additionally, publication in high impact peer-reviewed journals will be sought and presentation at national and international conferences is

1  
2 anticipated. Novel and modern information dissemination strategies will also be used including  
3 social media, podcast presentations and Free Open Access Medical education (FOAM)  
4 resources to generate discussion and disseminate the outcomes of the study.  
5  
6  
7  
8  
9

### 10 11 **Author Statement:**

12 DAL, VA, WB, KG and LJS conceived the study, developed the protocol, co-wrote the first  
13 draft of the manuscript, and approved the final draft. All other authors (LHC, NTS, KRC,  
14 ADM, SB, CFP, KM, NP, PJA, NB, BR, HB, KM, JCF, CS, SR, JB, SE, MSF, BWA, PV, DY,  
15 DA, MMHC, CPB, TLG, AI, IAN, JA) assisted with development of the interventions and  
16 methods, outcomes, and materials, reviewed the manuscript, and approved the final version.  
17  
18  
19  
20  
21  
22  
23  
24  
25  
26  
27

### 28 **Acknowledgements:**

29 We would like to thank the families who have generously participated in the development of  
30 the methods and family materials, and who will participate in the study.  
31  
32  
33  
34  
35  
36

### 37 **Patient and public involvement:**

38 Patients and/or the public were involved in the design, conduct, reporting, and dissemination  
39 plans of this research. Refer to the Methods section for further details.  
40  
41  
42  
43  
44  
45  
46  
47  
48  
49  
50  
51  
52  
53  
54  
55  
56  
57  
58  
59  
60

**REFERENCES**

1. Bronicki RA, Chang AC. Management of the postoperative pediatric cardiac surgical patient. *Crit Care Med.* 2011;39(8):1974-84.
2. Jacobs JP, Mayer JE, Jr., Mavroudis C, O'Brien SM, Austin EH, 3rd, Pasquali SK, et al. The Society of Thoracic Surgeons Congenital Heart Surgery Database: 2016 Update on Outcomes and Quality. *Ann Thorac Surg.* 2016;101(3):850-62.
3. Lynn MM, Salemi JL, Kostelyna SP, Morris SA, Tejtel S, Lopez KN. Lesion-Specific Congenital Heart Disease Mortality Trends in Children: 1999 to 2017. *Pediatrics.* 2022;150(4).
4. Ntiloudi D, Giannakoulas G, Parcharidou D, Panagiotidis T, Gatzoulis MA, Karvounis H. Adult congenital heart disease: A paradigm of epidemiological change. *Int J Cardiol.* 2016;218:269-74.
5. Walker K, Badawi N, Halliday R, Stewart J, Sholler GF, Winlaw DS, et al. Early developmental outcomes following major noncardiac and cardiac surgery in term infants: a population-based study. *J Pediatr.* 2012;161(4):748-52.e1.
6. Loblein HJ, Vukmirovich PW, Donofrio MT, Sanz JH. Prevalence of neurodevelopmental disorders in a clinically referred sample of children with CHD. *Cardiology in the Young.* 2022:1-8.
7. Liamlahi R, Latal B. Neurodevelopmental outcome of children with congenital heart disease. *Handbook of Clinical Neurology.* 2019;162:329-45.
8. Limperopoulos C, Majnemer A, Shevell MI, Rosenblatt B, Rohlicek C, Tchervenkov C. Neurodevelopmental status of newborns and infants with congenital heart defects before and after open heart surgery. *The Journal of pediatrics.* 2000;137(5):638-45.
9. Yi S-H, Kim S-J, Huh J, Jun T-G, Cheon HJ, Kwon J-Y. Dysphagia in infants after open heart procedures. *American journal of physical medicine & rehabilitation.* 2013;92(6):496-503.

10. Fourdain S, St-Denis A, Harvey J, Birca A, Carmant L, Gallagher A, et al. Language development in children with congenital heart disease aged 12–24 months. *European Journal of Paediatric Neurology*. 2019;23(3):491-9.
11. Gaudet I, Paquette N, Bernard C, Doussau A, Harvey J, Beaulieu-Genest L, et al. Neurodevelopmental Outcome of Children with Congenital Heart Disease: A Cohort Study from Infancy to Preschool Age. *The Journal of Pediatrics*. 2021;239:126-35. e5.
12. Lawley CM, Winlaw DS, Sholler GF, Martin A, Badawi N, Walker K, et al. School-Age Developmental and Educational Outcomes Following Cardiac Procedures in the First Year of Life: A Population-Based Record Linkage Study. *Pediatr Cardiol*. 2019;40(3):570-9.
13. Petrou S, Johnson S, Wolke D, Marlow N. The association between neurodevelopmental disability and economic outcomes during mid-childhood. *Child: care, health and development*. 2013;39(3):345-57.
14. Wood NS, Marlow N, Costeloe K, Gibson AT, Wilkinson AR. Neurologic and developmental disability after extremely preterm birth. *New England Journal of Medicine*. 2000;343(6):378-84.
15. Adams-Chapman I, DeMauro SB. Neurodevelopmental outcomes of the preterm infant. *Clinics in perinatology*. 2018;45(3):xvii-xviii.
16. Feldmann M, Bataillard C, Ehrler M, Ullrich C, Knirsch W, Gosteli-Peter MA, et al. Cognitive and executive function in congenital heart disease: a meta-analysis. *Pediatrics*. 2021;148(4).
17. Jackson WM, Davis N, Calderon J, Lee JJ, Feirsen N, Bellinger DC, et al. Executive functions in children with heart disease: a systematic review and meta-analysis. *Cardiology in the Young*. 2021;31(12):1914-22.
18. Marino BS, Lipkin PH, Newburger JW, Peacock G, Gerdes M, Gaynor JW, et al. Neurodevelopmental outcomes in children with congenital heart disease: evaluation and

1  
2 management: a scientific statement from the American Heart Association. *Circulation*.  
3  
4 2012;126(9):1143-72.  
5

6  
7 19. Majnemer A, Limperopoulos C, Shevell MI, Rohlicek C, Rosenblatt B, Tchervenkov  
8  
9 C. A new look at outcomes of infants with congenital heart disease. *Pediatric neurology*.  
10  
11 2009;40(3):197-204.  
12

13  
14 20. Sarrechia I, Miatton M, De Wolf D, François K, Gewillig M, Meyns B, et al.  
15  
16 Neurocognitive development and behaviour in school-aged children after surgery for  
17  
18 univentricular or biventricular congenital heart disease. *European Journal of Cardio-Thoracic*  
19  
20 *Surgery*. 2016;49(1):167-74.  
21

22  
23 21. Sarrechia I, Miatton M, François K, Gewillig M, Meyns B, Vingerhoets G, et al.  
24  
25 Neurodevelopmental outcome after surgery for acyanotic congenital heart disease. *Research*  
26  
27 *in developmental disabilities*. 2015;45:58-68.  
28

29  
30 22. Hövels-Gürich HH, Seghaye M-C, Schnitker R, Wiesner M, Huber W, Minkenberg  
31  
32 R, et al. Long-term neurodevelopmental outcomes in school-aged children after neonatal  
33  
34 arterial switch operation. *The Journal of Thoracic and Cardiovascular Surgery*.  
35  
36 2002;124(3):448-58.  
37

38  
39 23. Simons JS, Glidden R, Sheslow D, Pizarro C. Intermediate neurodevelopmental  
40  
41 outcome after repair of ventricular septal defect. *The Annals of thoracic surgery*.  
42  
43 2010;90(5):1586-91.  
44

45  
46 24. Hövels-Gürich HH, Konrad K, Skorzewski D, Nacken C, Minkenberg R, Messmer BJ,  
47  
48 et al. Long-term neurodevelopmental outcome and exercise capacity after corrective surgery  
49  
50 for tetralogy of Fallot or ventricular septal defect in infancy. *The Annals of thoracic surgery*.  
51  
52 2006;81(3):958-66.  
53

54  
55 25. Bellinger DC, Wypij D, Rappaport LA, Jonas RA, Wernovsky G, Newburger JW.  
56  
57 Neurodevelopmental status at eight years in children with dextro-transposition of the great  
58  
59  
60

- 1  
2  
3 arteries: the Boston Circulatory Arrest Trial. *The Journal of thoracic and cardiovascular*  
4  
5 *surgery*. 2003;126(5):1385-96.  
6  
7 26. Billotte M, Deken V, Joriot S, Vaksmann G, Richard A, Bouzguenda I, et al.  
8  
9 Screening for neurodevelopmental disorders in children with congenital heart disease.  
10  
11 *European Journal of Pediatrics*. 2021;180(4):1157-67.  
12  
13  
14 27. Ryan KR, Jones MB, Allen KY, Marino BS, Casey F, Wernovsky G, et al.  
15  
16 Neurodevelopmental outcomes among children with congenital heart disease: at-risk  
17  
18 populations and modifiable risk factors. *World Journal for Pediatric and Congenital Heart*  
19  
20 *Surgery*. 2019;10(6):750-8.  
21  
22  
23 28. Bowe AK, Hourihane J, Staines A, Murray DM. The predictive value of the ages and  
24  
25 stages questionnaire in late infancy for low average cognitive ability at age 5. *Acta*  
26  
27 *Paediatrica*. 2022;111(6):1194-200.  
28  
29  
30 29. Sanz JH, Anixt J, Bear L, Basken A, Beca J, Marino BS, et al. Characterisation of  
31  
32 neurodevelopmental and psychological outcomes in CHD: a research agenda and  
33  
34 recommendations from the cardiac neurodevelopmental outcome collaborative. *Cardiology in*  
35  
36 *the Young*. 2021;31(6):876-87.  
37  
38  
39 30. Schlapbach LJ, Horton SB, Long DA, Beca J, Erickson S, Festa M, et al. Study  
40  
41 protocol: NITric oxide during cardiopulmonary bypass to improve Recovery in Infants with  
42  
43 Congenital heart defects (NITRIC trial): a randomised controlled trial. *BMJ Open*.  
44  
45 2019;9(8):e026664.  
46  
47  
48 31. Gibbons KS, Schlapbach LJ, Horton SB, Long DA, Beca J, Erickson S, et al.  
49  
50 Statistical analysis plan for the NITric oxide during cardiopulmonary bypass to improve  
51  
52 Recovery in Infants with Congenital heart defects (NITRIC) trial. *Critical Care and*  
53  
54 *Resuscitation*. 2021;23(1):47-58.  
55  
56  
57 32. Schlapbach LJ, Gibbons KS, Horton SB, Johnson K, Long DA, Buckley DH, et al.  
58  
59 Effect of Nitric Oxide via Cardiopulmonary Bypass on Ventilator-Free Days in Young  
60

1  
2 Children Undergoing Congenital Heart Disease Surgery: The NITRIC Randomized Clinical  
3 Trial. JAMA. 2022;328(1):38-47.  
4

5  
6  
7 33. Von Elm E, Altman DG, Egger M, Pocock SJ, Gøtzsche PC, Vandenbroucke JP, et al.  
8 The Strengthening the Reporting of Observational Studies in Epidemiology (STROBE)  
9 Statement: guidelines for reporting observational studies. International journal of surgery.  
10  
11  
12  
13  
14 2014;12(12):1495-9.  
15

16  
17 34. Australian Bureau of Statistics. Socio-Economic Indexes for Areas 2022 [updated 6  
18 May 2022. Available from: <https://www.abs.gov.au/websitedbs/censushome.nsf/home/seifa>.  
19

20  
21 35. Atkinson J, Salmond C, Crampton P. NZDep2013 index of deprivation. Wellington:  
22 Department of Public Health, University of Otago. 2014.  
23

24  
25 36. Australian Bureau of Statistics. Remoteness Structure 2016 [Available from:  
26  
27 <https://www.abs.gov.au/statistics/statistical-geography/remoteness-structure>.  
28

29  
30 37. Statistics New Zealand. New Zealand: an urban/rural profile. Wellington Statistics  
31 New Zealand. 2004.  
32

33  
34 38. Ware J, Butcher JL, Latal B, Sadhwani A, Rollins CK, Soto CLB, et al.  
35 Neurodevelopmental evaluation strategies for children with congenital heart disease aged  
36 birth through 5 years: recommendations from the cardiac neurodevelopmental outcome  
37 collaborative. Cardiology in the Young. 2020;30(11):1609-22.  
38  
39

40  
41 39. Spector LG, Menk JS, Knight JH, McCracken C, Thomas AS, Vinocur JM, et al.  
42 Trends in long-term mortality after congenital heart surgery. Journal of the American College  
43 of Cardiology. 2018;71(21):2434-46.  
44

45  
46 40. Als LC, Tennant A, Nadel S, Cooper M, Pierce CM, Garralda ME. Persistence of  
47 neuropsychological deficits following pediatric critical illness. Critical Care Medicine.  
48  
49 2015;43(8):e312-e5.  
50

51  
52 41. Verstraete S, Verbruggen SC, Hordijk JA, Vanhorebeek I, Dulfer K, Güiza F, et al.  
53 Long-term developmental effects of withholding parenteral nutrition for 1 week in the  
54  
55  
56  
57  
58  
59  
60



- 1  
2  
3  
4  
5  
6  
7  
8  
9  
10  
11  
12  
13  
14  
15  
16  
17  
18  
19  
20  
21  
22  
23  
24  
25  
26  
27  
28  
29  
30  
31  
32  
33  
34  
35  
36  
37  
38  
39  
40  
41  
42  
43  
44  
45  
46  
47  
48  
49  
50  
51  
52  
53  
54  
55  
56  
57  
58  
59  
60
- paediatric intensive care unit: a 2-year follow-up of the PEPaNIC international, randomised, controlled trial. *The Lancet Respiratory Medicine*. 2019;7(2):141-53.
42. Abshire M, Dinglas VD, Cajita MIA, Eakin MN, Needham DM, Himmelfarb CD. Participant retention practices in longitudinal clinical research studies with high retention rates. *BMC medical research methodology*. 2017;17(1):1-10.
43. Robinson KA, Dennison CR, Wayman DM, Pronovost PJ, Needham DM. Systematic review identifies number of strategies important for retaining study participants. *Journal of clinical epidemiology*. 2007;60(8):757. e1-. e19.
44. Robinson KA, Dinglas VD, Sukrithan V, Yalamanchilli R, Mendez-Tellez PA, Dennison-Himmelfarb C, et al. Updated systematic review identifies substantial number of retention strategies: using more strategies retains more study participants. *Journal of clinical epidemiology*. 2015;68(12):1481-7.
45. Tansey CM, Matté AL, Needham D, Herridge MS. Review of retention strategies in longitudinal studies and application to follow-up of ICU survivors. *Intensive care medicine*. 2007;33(12):2051-7.
46. Needham D. Improving Long-Term Outcomes Research for Acute Respiratory Failure 2023 [Available from: <https://www.improvelto.com/>].
47. Long D, Gibbons K, Dow B, Best J, Webb K-L, Liley HG, et al. Effectiveness–implementation hybrid-2 randomised trial of a collaborative Shared Care Model for Detecting Neurodevelopmental Impairments after Critical Illness in Young Children (DAISY): pilot study protocol. *BMJ open*. 2022;12(7):e060714.
48. Schlapbach LJ, Gibbons K, Ridolfi R, Harley A, Cree M, Long D, et al. Resuscitation in Paediatric Sepsis Using Metabolic Resuscitation–A Randomized Controlled Pilot Study in the Paediatric Intensive Care Unit (RESPOND PICU): Study Protocol and Analysis Plan. *Frontiers in pediatrics*. 2021;9:663435.

- 1  
2  
3 49. Raman S, Brown G, Long D, Gelbart B, Delzoppo C, Millar J, et al. Priorities for  
4  
5 paediatric critical care research: a modified Delphi study by the Australian and New Zealand  
6  
7 Intensive Care Society Paediatric Study Group. *Critical Care and Resuscitation*.  
8  
9 2021;23(2):194-201.  
10  
11 50. Fink EL, Maddux AB, Pinto N, Sorenson S, Notterman D, Dean JM, et al. A core  
12  
13 outcome set for pediatric critical care. *Critical care medicine*. 2020;48(12):1819-28.  
14  
15  
16  
17  
18  
19  
20  
21  
22  
23  
24  
25  
26  
27  
28  
29  
30  
31  
32  
33  
34  
35  
36  
37  
38  
39  
40  
41  
42  
43  
44  
45  
46  
47  
48  
49  
50  
51  
52  
53  
54  
55  
56  
57  
58  
59  
60

**Supplemental materials for:****A Longitudinal Cohort Study Investigating Neurodevelopmental and Socio-emotional Outcomes in School-Entry aged Children after Open Heart Surgery in Australia and New Zealand: The NITRIC Follow-up Study Protocol**

Debbie Long<sup>1,2</sup>, Vicki A Anderson<sup>3,4</sup>, Louise H Crossley<sup>3</sup>, Nikita Tuli Sood<sup>3</sup>, Karina R Charles<sup>1,2</sup>, Anna D MacDonald<sup>5</sup>, Samudragupta Bora<sup>6,7</sup>, Carmela F Pestell<sup>8</sup>, Kathryn Murrell<sup>9</sup>, Natalie Pride<sup>10</sup>, Peter J Anderson<sup>11</sup>, Nadia Badawi<sup>12</sup>, Brian Rose<sup>13,14</sup>, Heidi Baillie<sup>15</sup>, Kate Masterson<sup>3,16</sup>, Jenipher Chumbes Flores<sup>17</sup>, Claire Sherring<sup>18</sup>, Sainath Raman<sup>2,5</sup>, John Beca<sup>18</sup>, Simon Erickson<sup>17</sup>, Marino S Festa<sup>15</sup>, Benjamin W Anderson<sup>19,20</sup>, Prem Venugopal<sup>20,21</sup>, Deane Yim<sup>22</sup>, David Andrew<sup>23</sup>, Michael M H Cheung<sup>24,25</sup>, Christian P Brizard<sup>25,26</sup>, Thomas L Gentles<sup>27,28</sup>, Ajay Iyengar<sup>28,29</sup>, Ian A Nicholson<sup>30</sup>, Julian Ayer<sup>30</sup>, Warwick Butt<sup>3,16</sup>, Luregn J Schlapbach<sup>5,31</sup>, Kristen S Gibbons<sup>5</sup>, and The NITRIC Follow-up Study Group, and The Australian and New Zealand Intensive Care Society (ANZICS) Paediatric Study Group (PSG)

<sup>1</sup> School of Nursing, Centre for Healthcare Transformation, Queensland University of Technology, Kelvin Grove, QLD, Australia

<sup>2</sup> Paediatric Intensive Care Unit, Queensland Children's Hospital, South Brisbane, QLD Australia

<sup>3</sup> Clinical Sciences, Murdoch Children's Research Institute, Parkville, VIC, Australia

<sup>4</sup> Psychology Service, Royal Children's Hospital Melbourne, Parkville, VIC, Australia

<sup>5</sup> Child Health Research Centre, The University of Queensland, Brisbane, QLD, Australia

<sup>6</sup> Department of Pediatrics, University Hospitals Rainbow Babies & Children's Hospital, Case Western Reserve University School of Medicine, Cleveland, OH, United States

<sup>7</sup> Mater Research Institute, Faculty of Medicine, The University of Queensland, Brisbane, QLD, Australia

<sup>8</sup> School of Psychological Science, University of Western Australia, Crawley, WA, Australia

<sup>9</sup> Starship Children's Hospital, Auckland, New Zealand

<sup>10</sup> Kids Neuroscience Centre, The Children's Hospital at Westmead, Westmead, NSW, Australia

<sup>11</sup> Turner Institute for Brain and Mental Health, School of Psychological Sciences, Monash University, Clayton, VIC, Australia

<sup>12</sup> Grace Centre for Newborn Care, The Children's Hospital at Westmead, Westmead, NSW, Australia

<sup>13</sup> Consumer Representative, Child Health Research Centre, The University of Queensland, South Brisbane, QLD, Australia

<sup>14</sup> Australian and New Zealand Fontan Advocacy Committee, HeartKids Ltd, Sydney, NSW, Australia

<sup>15</sup> Paediatric Intensive Care Unit, The Children's Hospital at Westmead, Westmead, NSW, Australia

<sup>16</sup> Paediatric Intensive Care Unit, Royal Children's Hospital, Parkville, VIC, Australia

<sup>17</sup> Paediatric Intensive Care Unit, Perth Children's Hospital, Nedlands, WA, Australia

<sup>18</sup> Paediatric Intensive Care Unit, Starship Children's Hospital, Auckland, New Zealand

<sup>19</sup> Queensland Paediatric Cardiac Service, Children's Health Queensland Hospital and Health Service, South Brisbane, QLD, Australia

<sup>20</sup> School of Medicine, The University of Queensland, South Brisbane, QLD, Australia

<sup>21</sup> Department for Cardiac Surgery, Queensland Children's Hospital, Brisbane, QLD, Australia

<sup>22</sup> Department of Paediatric Cardiology, Perth Children's Hospital, Nedlands, WA, Australia

<sup>23</sup> Department of Cardiothoracic Surgery, Perth Children's Hospital, Nedlands, WA, Australia

- 1  
2  
3 <sup>24</sup> Department of Cardiology, Royal Children's Hospital, Parkville, VIC, Australia  
4 <sup>25</sup> Murdoch Children's Research Institute, Parkville, VIC, Australia  
5 <sup>26</sup> Department of Cardiac Surgery, Royal Children's Hospital, Parkville, VIC, Australia  
6 <sup>27</sup> Paediatric and Congenital Cardiac Service, Starship Children's Hospital, Auckland, New Zealand  
7 <sup>28</sup> Paediatrics, Child and Youth Health, University of Auckland, Auckland, New Zealand  
8 <sup>29</sup> Department of Surgery, University of Auckland, Auckland, New Zealand  
9 <sup>30</sup> Heart Centre for Children, The Children's Hospital at Westmead, Westmead, NSW, Australia  
10 <sup>31</sup> Department of Intensive Care and Neonatology, Children's Research Centre, University Children's Hospital Zurich, Zurich, Switzerland  
11  
12

### **The NITRIC Follow-up Study Group**

13  
14 Kristen S Gibbons, Luregn J Schlapbach, Samudragupta Bora, Devika Ganesamoorthy, Anna D MacDonald, Antje Blumenthal, Trang M T Pham, Endrias  
15 Ergetu, The University of Queensland, Brisbane, Australia; Debbie Long, Queensland University of Technology, Brisbane, Australia; Sainath Raman, Karina  
16 R Charles, Prem Venugopal, Benjamin W Anderson, Queensland Children's Hospital, Brisbane, Australia; Warwick Butt, Vicki A Anderson, Kate Masterson,  
17 Jenni Braeutigam, Michael M H Cheung, Christian P Brizard, Royal Children's Hospital, Melbourne, Australia; Peter J Anderson, Monash University,  
18 Melbourne, Australia; Lachlan Coin, University of Melbourne, Melbourne, Australia; Simon Erickson, Carmela F Pestell, Jenipher Chumbes Flores, Deane  
19 Yim, David Andrews, Perth Children's Hospital, Perth, Australia; Marino S Festa, Nadia Badawi, Natalie Pride, Heidi Baillie, Jennifer Darvas, Ian A  
20 Nicholson, Julian Ayer, The Children's Hospital at Westmead, Sydney, Australia; John Beca, Kathryn Murrell, Laura Brown, Claire Sherring, Shelley Coetzer,  
21 Thomas L Gentles, Ajay Iyengar, Starship Children's Hospital, Auckland, New Zealand; and Brian Rose, Holly Williams, Consumer Representatives.  
22

### **The ANZICS PSG**

23  
24 Breanna Pellegrini, Australian and New Zealand Paediatric Intensive Care Registry; Shane George, Gold Coast University Hospital, Gold Coast, Australia;  
25 Corrine Balit, John Hunter Hospital, Newcastle, Australia; Felix Oberender, Monash Children's Hospital, Melbourne, Australia; Simon Erickson, Jenipher  
26 Chumbes Flores, Perth Children's Hospital, Perth, Australia; Karina Charles, Sainath Raman, Michaela Waak, Queensland Children's Hospital, Brisbane,  
27 Australia; Debbie Long, Queensland University of Technology, Brisbane, Australia; Warwick Butt (Chair), Carmel Delzoppo, Ben Gelbart, Kate Masterson,  
28 Johnny Millar, Royal Children's Hospital, Melbourne, Australia; Anusha Ganeshalingam, Claire Sherring, Starship Children's Hospital, Auckland, New  
29 Zealand; Puneet Singh, Vicky Smith, Sydney Children's Hospital, Randwick, Australia; Kristen Gibbons, Luregn Schlapbach (Past Chair), Jessica Schults,  
30 The University of Queensland, Brisbane, Australia; and Jennifer Darvas, Marino Festa, The Children's Hospital at Westmead, Sydney, Australia.  
31  
32

### **Corresponding Author:**

33 A/Prof Kristen Gibbons, PhD  
34 Child Health Research Centre, The University of Queensland  
35 62 Graham St, South Brisbane, Queensland, 4101, Australia  
36 Email: [k.gibbons@uq.edu.au](mailto:k.gibbons@uq.edu.au); Phone: +61 407 966 708  
37  
38  
39  
40  
41  
42  
43  
44  
45  
46

**Table of Contents:**

Table S1. Parent-completed online screening assessments conducted at 2- to 5-years of age

Table S2. Face-to-face neurodevelopmental assessment at 5-years of age

References.

For peer review only

Table S1. Parent-completed online screening assessments conducted at 2- to 5-years of age

| Construct                                 | Instrument <sup>#^</sup>                                           | Number of Items    | Scoring and Interpretation                                                                                                                                                                                                                                                                                                                                                | Comments                                                                                                                                                                                             |
|-------------------------------------------|--------------------------------------------------------------------|--------------------|---------------------------------------------------------------------------------------------------------------------------------------------------------------------------------------------------------------------------------------------------------------------------------------------------------------------------------------------------------------------------|------------------------------------------------------------------------------------------------------------------------------------------------------------------------------------------------------|
| <b>Child-focused Measures<sup>§</sup></b> |                                                                    |                    |                                                                                                                                                                                                                                                                                                                                                                           |                                                                                                                                                                                                      |
| Neurodevelopment                          | Ages and Stages Questionnaire, 3 <sup>rd</sup> Edition (ASQ-3) (1) | 30                 | Each item scored: Yes, Sometimes, or Not yet. Above, close to, and below cut-off scores provided based on aged norms for each domain. Domain scores added to create total score. Higher scores indicate better neurodevelopment. <i>Main outcome definition: Total ASQ-3 Score (continuous)</i>                                                                           | 5-10 mins to complete. 21 age-appropriate questionnaires for 1-66 months. Domains: communication, gross motor, fine motor, problem-solving and personal-social.                                      |
| Socioemotional Behavior                   | Strengths and Difficulties Questionnaire (SDQ) (2)                 | 25                 | Each item scored on a 3-point Likert scale: Not true, somewhat true, certainly true. Scale scores derived for Emotional problems, Conduct problems, Hyperactivity, Peer problems, Prosocial, and Total Difficulties, compared to aged norms. Higher scores indicate better socioemotional behavior. <i>Main outcome definition: Total Difficulties Score (continuous)</i> | 5-10 mins to complete. Two age-appropriate questionnaires for 2-17 years. Domains: emotional symptoms, conduct problems, hyperactivity/inattention, peer relationship problems, prosocial behaviors. |
| Health Related Quality of Life (HRQoL)    | Pediatric Quality of Life Inventory (PedsQL) (3, 4)                | 23-38 <sup>a</sup> | Each item scored on a 5-point Likert scale: 0 = Never a problem to 4 = Almost always a problem. Psychosocial Health Summary Score, Physical Health Summary Score, and Total Score, compared to aged norms. Higher scores indicate better HRQoL. <i>Main outcome definition: Total PedsQL Score (continuous)</i>                                                           | 5 mins to complete. Five age-appropriate questionnaires for 1 month – 18 years. Domains: physical, emotional, social, and school functioning.                                                        |

| Construct                      | Instrument <sup>#^</sup>                                                            | Number of Items | Scoring and Interpretation                                                                                                                                                                                                                                                                                                                                     | Comments                                                                                                                                                                        |
|--------------------------------|-------------------------------------------------------------------------------------|-----------------|----------------------------------------------------------------------------------------------------------------------------------------------------------------------------------------------------------------------------------------------------------------------------------------------------------------------------------------------------------------|---------------------------------------------------------------------------------------------------------------------------------------------------------------------------------|
| Executive Functioning          | Behavior Rating Inventory for Executive Function for Pre-schoolers (BRIEF-P) (5)    | 63              | Each item scored. Inhibitory Self-Control Index, Flexibility Index, Emergent Metacognition and Global Executive Composite score, compared to aged norms. The recommended cut-off for clinical significance is $\geq 65$ . Lower scores indicate better executive functioning.<br><i>Main outcome definition: Global Executive Composite Score (continuous)</i> | 10-15 mins to complete. One questionnaire 2 - 5 years 11 months. Domains: inhibit, shift, emotional control, working memory, plan/organize.                                     |
| Fatigue                        | The Pediatric Quality of Life Inventory (PedsQL) Multidimensional Fatigue Scale (6) | 6               | Each item scored on 5-point Likert scale: 0 = Never a problem to 4 = Almost always a problem. Total score compared to aged norms. Higher scores indicate lower problems.<br><i>Main outcome definition: Total General Fatigue Score (continuous)</i>                                                                                                           | General Fatigue subscale only 2 minutes to complete. Four age-appropriate questionnaires for 2 – 18 years. Domains: General fatigue, Sleep/rest fatigue, and Cognitive fatigue. |
| Healthcare Utilisation         | Developed by research team.                                                         | 12              | <i>Main outcome definition: Total parent-reported utilisation of in- and out-patient visits and costs (continuous)</i>                                                                                                                                                                                                                                         | 2 minutes to complete. Domains: Visits to healthcare professionals and facilities, and finances relating to appointments and care                                               |
| <b>Parent-focused Measures</b> |                                                                                     |                 |                                                                                                                                                                                                                                                                                                                                                                |                                                                                                                                                                                 |
| Emotional Wellbeing            | The Kessler-6 (K6) (7)                                                              | 6               | Items are scored on a 5-point Likert scale (1= 'none of the time' to 5 = 'all of the time'). Total score ranged from 0-24, with higher scores representing higher levels of psychological distress such as anxiety and depression.<br><i>Main outcome definition: Total K6 Score (continuous)</i>                                                              | 1 minute to complete                                                                                                                                                            |

| Construct        | Instrument <sup>#^</sup>                              | Number of Items | Scoring and Interpretation                                                                                                                                                                                                                                                                                              | Comments                                                                                                           |
|------------------|-------------------------------------------------------|-----------------|-------------------------------------------------------------------------------------------------------------------------------------------------------------------------------------------------------------------------------------------------------------------------------------------------------------------------|--------------------------------------------------------------------------------------------------------------------|
| Parenting Stress | The Parenting Stress Index-4 Short Form (PSI-4-SF)(8) | 36              | Items are scored on a 4-point Likert scale: 1 = Strongly agree to 5 = strongly disagree. A percentile score on Total stress $\geq$ 91% indicates clinically significant levels of stress. Higher scores indicate more parenting stress.<br><i>Main outcome definition: Total PIS-4-SF Percentile Score (continuous)</i> | 10 minutes to complete.<br>Domains: Parental distress, Parent-child dysfunctional interaction, and Difficult child |

<sup>#</sup>All measures used in accordance with associated user manuals; <sup>^</sup>Order of administration of questionnaires standardized; <sup>§</sup> All child-focused measures validated for use as parent-reported; <sup>a</sup> Depending on age.

For peer review only

1  
2  
3  
4  
5  
6  
7  
8  
9  
10  
11  
12  
13  
14  
15  
16  
17  
18  
19  
20  
21  
22  
23  
24  
25  
26  
27  
28  
29  
30  
31  
32  
33  
34  
35  
36  
37  
38  
39  
40  
41  
42  
43  
44  
45  
46



**Table S2. Face-to-face neurodevelopmental assessment at 5-years of age**

| Construct                    | Instrument <sup>#^</sup>                                                                                                                        | Number of Items | Scoring and Interpretation                                                                                                                                                                                                                                                 | Comments                                                                                                                                                            |
|------------------------------|-------------------------------------------------------------------------------------------------------------------------------------------------|-----------------|----------------------------------------------------------------------------------------------------------------------------------------------------------------------------------------------------------------------------------------------------------------------------|---------------------------------------------------------------------------------------------------------------------------------------------------------------------|
| <b>Face-to-Face Measures</b> |                                                                                                                                                 |                 |                                                                                                                                                                                                                                                                            |                                                                                                                                                                     |
| Cognition                    | Wechsler Preschool & Primary Scale of Intelligence – 4 <sup>th</sup> Edition Australia and New Zealand Standardised Edition (WPPSI-IV A&NZ) (9) | 15 subtests     | Three levels of interpretation: Full Scale, Primary Index scales, and Ancillary Index scales. The Full Scale and all indexes have a mean score of 100 and SD of 15. Higher scores indicate higher cognition.<br><i>Main outcome definition: Full Scale IQ (continuous)</i> | Block design, Information, Matrix reasoning, Bug search, Picture memory, Similarities, Cancellation and Zoo location subtests only. Administration time: 45-60 mins |
| Motor function               | Movement Assessment Battery for Children, 2 <sup>nd</sup> Edition (MABC-2) (10)                                                                 | 8 tasks         | 8 Task standard scores and a Total test score. Manual dexterity component score: sum of standard scores of MD1, MD2 and MD3. Higher scores indicate better motor function.<br><i>Main outcome definition: Manual Dexterity Component Score (continuous)</i>                | Posting coins, Threading beads and Drawing trail 1 subtests only. Administration time: 10 mins                                                                      |
| Executive Function           | Day/Night Task (11)                                                                                                                             | 16 cards        | Total correct, Total Self Corrections, Total Time, Efficiency Score (Total Correct/Total Time to Complete). Higher scores indicate better executive function.<br><i>Main outcome definition: Efficiency Score (continuous)</i>                                             | Administration time: 5 mins                                                                                                                                         |

| Construct          | Instrument <sup>#^</sup>                                                                                                                           | Number of Items  | Scoring and Interpretation                                                                                                                                                                                                                                                         | Comments                                                                                                                     |
|--------------------|----------------------------------------------------------------------------------------------------------------------------------------------------|------------------|------------------------------------------------------------------------------------------------------------------------------------------------------------------------------------------------------------------------------------------------------------------------------------|------------------------------------------------------------------------------------------------------------------------------|
| Attention - Visual | Test of Everyday Attention for Children, 2 <sup>nd</sup> Edition (TEA-Ch2) (12)                                                                    | 5 trials         | Scaled scores have a mean of 10 and SD of 3 (Range 1-19). Percentile ranked score. Higher scores indicate better attention.<br><i>Main outcome definition: Attention Score (continuous)</i>                                                                                        | Balloon Hunt and Balloons 5 subtests only.<br>Administration time: 7 mins                                                    |
| Language           | Clinical Evaluation of Language Fundamentals – Australian and New Zealand 5 <sup>th</sup> Edition Screening Test (CELF-5 A&NZ Screening Test) (13) | 13               | Total Score: sum of the child's score points. Total score compared to a research-based criterion score appropriate for the child's age. Age 5:0-8:11 have one criterion score. Higher scores indicate better language.<br><i>Main outcome definition: Total Score (continuous)</i> | Word structure, Word Classes, Following directions and Recalling sentences subtests only.<br>Administration time: 10-15 mins |
| Attention          | Conners Kiddie Continuous Performance Test, 2 <sup>nd</sup> Edition (K-CPT 2) (14)                                                                 | Up to 200 trials | Higher scores indicate poorer attention.<br><i>Main outcome definition: Composite Attention Score</i>                                                                                                                                                                              | 4 domains of attention: Impulsivity, Inattentiveness, Sustained attention, and Vigilance.<br>Administration time: 7 mins     |

| Construct                               | Instrument <sup>#^</sup>                                                            | Number of Items           | Scoring and Interpretation                                                                                                                                                                                                                                                                                                                                                             | Comments                                                   |
|-----------------------------------------|-------------------------------------------------------------------------------------|---------------------------|----------------------------------------------------------------------------------------------------------------------------------------------------------------------------------------------------------------------------------------------------------------------------------------------------------------------------------------------------------------------------------------|------------------------------------------------------------|
| Memory                                  | Wide Range Assessment of Memory and Learning, 3 <sup>rd</sup> Edition (WRAML3) (15) | 4 stories<br>85 questions | Scaled score, M=10, SD=3. Subtest scaled scores derived from the total raw scores on a given subtest- and describe the overall performance on that subtest.<br>Story Memory – story memory total raw score.<br>Story Recognition – story memory recognition total raw score. Higher scores indicate better memory.<br><i>Main outcome definition: Verbal Memory Score (continuous)</i> | Story Memory subtest only.<br>Administration time: 20 mins |
| Memory                                  | Working Memory Test Battery for Children (WMTB-C) (16)                              | 9                         | Trials Correct Score: Total number of correct trials achieved before testing is discontinued. Higher scores indicate better memory.<br><i>Main outcome definition: Total Trials Correct (continuous)</i>                                                                                                                                                                               | Digit Recall subtest only.<br>Administration time: 5 mins  |
| <b>Parent-completed Online Measures</b> |                                                                                     |                           |                                                                                                                                                                                                                                                                                                                                                                                        |                                                            |
| Social behavior/Autism                  | Social Responsiveness Scale, 2 <sup>nd</sup> Edition (SRS-2) (17)                   | 65                        | Each item scored on a 4-point Likert scale: 1 = Not true to 4 = Almost always true.<br>Scores: Total, Treatment subscales, DSM-5 compatible subscales. Higher scores indicate clinically significant deficiencies in social behavior<br><i>Main outcome definition: Total Score (continuous)</i>                                                                                       | Administration time: 15-20 mins                            |

| Construct          | Instrument <sup>#^</sup>                                                   | Number of Items | Scoring and Interpretation                                                                                                                                                                                                                                                                                                                                                                                                                                                                                                                  | Comments                                                                                                                          |
|--------------------|----------------------------------------------------------------------------|-----------------|---------------------------------------------------------------------------------------------------------------------------------------------------------------------------------------------------------------------------------------------------------------------------------------------------------------------------------------------------------------------------------------------------------------------------------------------------------------------------------------------------------------------------------------------|-----------------------------------------------------------------------------------------------------------------------------------|
| ADHD               | ADHD Rating Scale, 5 <sup>th</sup> Edition (ADHD-RS-5) (18)                | 18              | <p>Each item scored on a 4-point Likert scale.</p> <p>Scores: Total, Inattention and Hyperactivity-Impulsivity.</p> <p>Total raw score: Sum of inattention and hyperactivity subscale raw scores. Converted to total percentile score. Higher scores indicate more impairment in attention.</p> <p><i>Main outcome definition: Total Percentile Score (continuous)</i></p>                                                                                                                                                                  | Administration time: 5 mins                                                                                                       |
| Social functioning | Adaptive Behavior Assessment System, 3 <sup>rd</sup> Edition (ABAS-3) (19) | 46              | <p>Each item is scored on a 4-point Likert scale: 0 = Is not able to do this behavior to 3 = Always (or almost always)</p> <p>Standard Score for Social Adaptive domain compared to norms. Mean of 100 and SD of 15. Lower scores indicate lower adaptive behaviors. General Adaptive Composite Score: Composed on all measured skill areas, providing an overall estimate of adaptive behavior. Higher scores indicate better social functioning.</p> <p><i>Main outcome definition: General Adaptive Composite Score (continuous)</i></p> | <p>Leisure and Social subscales only</p> <p>Administration time: 10 mins</p> <p>One age-appropriate questionnaire 5-21 years.</p> |

| Construct               | Instrument <sup>#^</sup>                                                                     | Number of Items | Scoring and Interpretation                                                                                                                                                                                                                                                                                                                           | Comments                                                                                                                                                 |
|-------------------------|----------------------------------------------------------------------------------------------|-----------------|------------------------------------------------------------------------------------------------------------------------------------------------------------------------------------------------------------------------------------------------------------------------------------------------------------------------------------------------------|----------------------------------------------------------------------------------------------------------------------------------------------------------|
| Fatigue                 | Pediatric Quality of Life Inventory (PedsQL) Multidimensional Fatigue Scale – Full scale (6) | 18              | Each item scored on 5-point Likert scale: 0 = Never a problem to 4 = Almost always a problem.<br>Total score: Sum of general, sleep/rest and cognitive fatigue. Higher scores indicate lower problems.<br><i>Main outcome definition: Total Fatigue Score (continuous)</i>                                                                           | Administration time: 5 mins<br>Four age-appropriate questionnaires 2 – 18 years.<br>Domains: General fatigue, Sleep/rest fatigue, and Cognitive fatigue. |
| Parent-Child Attachment | Attachment Relationship Inventory-Caregiver Perspective (ARI-CP 2-5) (20)                    | 48              | Each item scored on a 6-point Likert scale: 1 = Not at all applicable to 5 = Fully applicable.<br>Four subscales (secure, avoidant, ambivalent, disorganized).<br>Scale scores represent the sum scores of all items of the scale. Higher scores indicate better attachment.<br><i>Main outcome definition: Global Attachment Score (continuous)</i> | Administration time: 5 mins                                                                                                                              |

<sup>#</sup>All measures used in accordance with associated user manuals; <sup>^</sup>Order of administration of questionnaires standardized; <sup>a</sup> Depending on age.

## References

1. Squires J, Potter L, Bricker D. The ASQ user's guide for the Ages & Stages Questionnaires: A parent-completed, child-monitoring system. Baltimore, MD, US: Paul H Brookes Publishing; 1995. xvi, 156-xvi, p.
2. Goodman R. The Strengths and Difficulties Questionnaire: a research note. *J Child Psychol Psychiatry*. 1997;38(5):581-6.
3. Varni JW, Burwinkle TM, Seid M, Skarr D. The PedsQL 4.0 as a pediatric population health measure: feasibility, reliability, and validity. *Ambul Pediatr*. 2003;3(6):329-41.
4. Varni JW, Seid M, Kurtin PS. PedsQL 4.0: reliability and validity of the Pediatric Quality of Life Inventory version 4.0 generic core scales in healthy and patient populations. *Med Care*. 2001;39(8):800-12.
5. Gioia G, K. E, Isquith P. Behavior Rating Inventory of Executive Function Preschool Version (BRIEF-P). Odessa, Florida: Psychological Assessment Resources; 2002.
6. Varni JW, Burwinkle TM, Katz ER, Meeske K, Dickinson P. The PedsQL in pediatric cancer: reliability and validity of the Pediatric Quality of Life Inventory Generic Core Scales, Multidimensional Fatigue Scale, and Cancer Module. *Cancer*. 2002;94(7):2090-106.
7. Kessler RC, Andrews G, Colpe LJ, Hiripi E, Mroczek DK, Normand SL, et al. Short screening scales to monitor population prevalences and trends in non-specific psychological distress. *Psychol Med*. 2002;32(6):959-76.
8. Haskett ME, Ahern LS, Ward CS, Allaire JC. Factor structure and validity of the parenting stress index-short form. *J Clin Child Adolesc Psychol*. 2006;35(2):302-12.
9. Wechsler D. Wechsler Preschool and Primary Scale of Intelligence – Fourth Edition. San Antonio, Texas: The Psychological Corporation; 2012.
10. Henderson S, Sugden D, Barnett A. Movement Assessment Battery for Children-2. London: Pearson Assessment; 2007.
11. Gerstadt CL, Hong YJ, Diamond A. The relationship between cognition and action: performance of children 3 1/2-7 years old on a Stroop-like day-night test. *Cognition*. 1994;53(2):129-53.
12. Manly T, Anderson V, Crawford J, George M, Underbjerg M, Robertson IH. Test of Everyday Attention for Children, Second Edition (TEA–Ch2). London: Harcourt Assessment; 2016.
13. Wiig EH, Secord WA, Semel E. Clinical evaluation of language fundamentals: CELF-5. *Journal of Psychoeducational Assessment*. 2013a;33(5):495-500.
14. Conners KC. Conners K-CPT 2. Toronto, Canada: Multi-Health Systems; 2015.
15. Sheslow D, Adams W. Wide Range Assessment of Memory and Learning, 2nd Edition (WRAML2). Pearson; 2003.
16. Gathercole S, Pickering S. Working Memory Test Battery for Children (WMTB-C). United Kingdom: Pearson Clinical; 2001.
17. Constantino J, Gruber C. Social Responsiveness Scale - Second Edition (SRS-2). Torrance, California: Western Psychological Services; 2012.
18. DuPaul GJ. Parent and teacher ratings of ADHD symptoms: Psychometric properties in a community-based sample. *Journal of Clinical Child Psychology*. 1991;20:245-53.
19. Harrison P, Oakland T. Adaptive Behavior Assessment System - Third Edition (ABAS-3). Sydney: PsychCorp; 2015.
20. Spruit A, Colonesi C, Wissink I, Uittenbogaard R, Willems L, Stams GJ, et al. Development and validation of the Attachment Relationship Inventory—Caregiver Perception 2–5 years (ARI-CP 2–5): Psychometric structure, external validity, and norms. *Infant mental health journal*. 2021;42(2):188-205.

## Standard Protocol Items for Observational Studies (SPIROS)

**Table 1:** Checklist of preliminary items

| Section and topic                   | Description / sub-categories                                                 | Addressed on page number    |
|-------------------------------------|------------------------------------------------------------------------------|-----------------------------|
| <b>i) General Information</b>       |                                                                              |                             |
| Title                               | Descriptive title identifying study design                                   | Page 1                      |
| Protocol version                    | Version or amendment number and date and summary of changes                  | NA                          |
| Protocol summary                    | Brief summary of protocol research                                           | Pages 6-8                   |
| Sponsor and partner institute name  | Name of sponsor and participating institutes (if applicable)                 | Page 12                     |
| Investigators name                  | Name of principal and co investigators.                                      | Pages 1-4                   |
| Affiliation of investigators        | Affiliated institutions of investigators                                     | Pages 1-4                   |
| Principal researcher contact detail | Name, email address, affiliation of Principal researcher for correspondence. | Corresponding author page 4 |
| Table of content                    | Table of content                                                             | NA                          |
| Page number                         | Page number on each page of protocol                                         | Pages 1-49                  |
| List of Abbreviations               | A detailed List of all abbreviations used in protocol with full form.        | NA                          |
| <b>ii) Introduction</b>             |                                                                              |                             |
| Background of study                 | Scientific background of study                                               | Pages 9-11                  |
| Review of prior research            | Summary of all previous relevant research                                    | Pages 9-11                  |

|                         |                                                                                                                                                                                                                                                                               |                                 |
|-------------------------|-------------------------------------------------------------------------------------------------------------------------------------------------------------------------------------------------------------------------------------------------------------------------------|---------------------------------|
| Rationale of study      | Justification for conducting the study                                                                                                                                                                                                                                        | Page 11                         |
| Aim                     | Broader aims and specific objectives of the study                                                                                                                                                                                                                             | Pages 12                        |
| Objective of study      | Primary and secondary objectives of study                                                                                                                                                                                                                                     | Page 12                         |
| Prespecified hypothesis | Prespecified null or alternative hypothesis                                                                                                                                                                                                                                   | NA                              |
| <b>iii) Methods</b>     |                                                                                                                                                                                                                                                                               |                                 |
| Study design            | Description of type/design of study                                                                                                                                                                                                                                           | Page 12                         |
| Study setting           | Description of setting, locations, relevant dates, including periods of recruitment/survey, exposure, follow-up, and data collection.                                                                                                                                         | Pages 13                        |
|                         | Schedule of study procedure – Figure or table                                                                                                                                                                                                                                 | Tables 1-2                      |
| Sample size             | Estimated number, calculation and assumptions                                                                                                                                                                                                                                 | Page 35                         |
|                         | Power calculation                                                                                                                                                                                                                                                             | NA                              |
| Sampling procedure      | Description of sampling strategy to ensure representativeness and control of potential bias                                                                                                                                                                                   | Page 13                         |
| Participants            | <b>Cohort study</b> —eligibility criteria, and the sources and methods of selection of participants. Describe methods of follow-up.<br>For matched studies, give matching criteria and number of exposed and unexposed                                                        | Pages 13-15<br>Tables 1-2<br>NA |
|                         | <b>Case-control study</b> —Give the eligibility criteria, and the sources and methods of case ascertainment and control selection. Give the rationale for the choice of cases and controls<br>For matched studies, give matching criteria and the number of controls per case |                                 |



|                              |                                                                                                                                                                                                                                                                                                                           |                                                |
|------------------------------|---------------------------------------------------------------------------------------------------------------------------------------------------------------------------------------------------------------------------------------------------------------------------------------------------------------------------|------------------------------------------------|
|                              | <b>Cross-sectional study</b> —Give the eligibility criteria, and the sources and methods of selection of participants                                                                                                                                                                                                     |                                                |
| Variables                    | <ul style="list-style-type: none"> <li>• All outcomes</li> <li>• Exposures- definition of exposure of interest,</li> <li>• Predictors</li> <li>• Potential confounders</li> <li>• Effect modifiers</li> </ul>                                                                                                             | Page 15<br>Tables 1-2                          |
| Data Sources/<br>Measurement | <ul style="list-style-type: none"> <li>• For each variable of interest, give sources of data and details of methods of assessment (measurement).</li> <li>• Describe comparability of assessment methods if there is more than one group</li> <li>• Data collection points table</li> <li>• Blinding procedure</li> </ul> | Page 16-19, 21<br>Tables 1-2<br>NA<br>NA<br>NA |
| Bias                         | Describe any efforts to address potential sources of bias<br><br>More specifically- <ul style="list-style-type: none"> <li>• Information bias</li> <li>• Selection Bias</li> <li>• Control for confounding</li> </ul>                                                                                                     | Pages 16-19, 21                                |
| Statistical analysis<br>plan | <ul style="list-style-type: none"> <li>• Method of primary / secondary outcomes and additional analysis</li> <li>• Handling of missing data</li> <li>• Post-hoc analysis</li> </ul>                                                                                                                                       | Pages 16-19<br><br>Pages 16-19<br>NA           |

|                                               |                                                                                                                                                                                                                                                                                                                                      |                                  |
|-----------------------------------------------|--------------------------------------------------------------------------------------------------------------------------------------------------------------------------------------------------------------------------------------------------------------------------------------------------------------------------------------|----------------------------------|
| Handling of withdrawals and lost to follow up | Describe the procedures to be followed when a participant ceases participation in the study prematurely or is lost to follow up                                                                                                                                                                                                      | Pages 14-15, 16-19               |
| Replacements                                  | Provide information on whether or not participants who discontinue the study will be replaced via additional recruitment to maintain the required sample size.                                                                                                                                                                       | NA                               |
| Outcome                                       | Define and describe all primary and secondary outcome or lost to follow up                                                                                                                                                                                                                                                           | Pages -16-19<br>Tables 1-2       |
| Database management                           | <ul style="list-style-type: none"> <li>• Detail plan of database management including:</li> <li>• Data collection (electronic or paper based),</li> <li>• Source data</li> <li>• Data entry</li> <li>• Data editing</li> <li>• Coding</li> <li>• Data storage</li> <li>• Record retention</li> <li>• Data confidentiality</li> </ul> | Page 22                          |
| Validation of instrument                      | Reliability / validity of instrument or plan to establish validation                                                                                                                                                                                                                                                                 | Page 14-15<br>Tables 1-2         |
| Follow up                                     | Plan of follow up and addressing lost to follow up                                                                                                                                                                                                                                                                                   | Page 15; Tables 1-2              |
| Quality control                               | <ul style="list-style-type: none"> <li>• Method of quality control</li> <li>• Monitoring (internal and external)</li> <li>• Training of surveyors</li> </ul>                                                                                                                                                                         | Pages 22<br>Pages 22<br>Pages 22 |
| Quality assurance                             | Plan of quality assurance                                                                                                                                                                                                                                                                                                            | Pages 22                         |

|                                                  |                                                                                              |                 |
|--------------------------------------------------|----------------------------------------------------------------------------------------------|-----------------|
| Expected outcome /results                        | A brief description of expected outcome or results                                           | Pages 21        |
| <b>iv) Ethical consideration</b>                 |                                                                                              |                 |
| Ethical approval                                 | Whether it has been obtained and name of ethical committees. If approval not sought , Reason | Page 22         |
| Agreement and consent                            | Method of taking consent. Reason if consent not sought                                       | Pages 14-15, 22 |
| Risk / Harm to participants                      | Any potential risk or harm to study participants                                             | NA              |
| Adverse event and Severe adverse event reporting | Outline how Adverse Event and Severe adverse event information will be collected.            | NA              |
| <b>v) Reporting and dissemination</b>            |                                                                                              |                 |
| Protocol amendments                              | Methods of communicating to investigators/IRBs and documenting                               | Pages 22        |
| Dissemination                                    | How results will be disseminated to participants, practitioners, public                      | Page 22         |
| Publication Plan                                 | Who has right to publish; restrictions; authorship guidelines<br>Open Access                 | NA              |
| Reporting of early stopping                      | Dissemination of results if trial is stopped early (for any reason)                          | NA              |
| <b>vi) Others</b>                                |                                                                                              |                 |
| Limitations                                      | Limitations of proposed study, including risk of bias                                        | Page 21         |
| Strength of study                                | Highlight strengths of proposed study                                                        | Page 21         |
| References                                       | List of references cited in protocol                                                         | Pages 24-30     |

|                                          |                                                                                                                                                |                              |
|------------------------------------------|------------------------------------------------------------------------------------------------------------------------------------------------|------------------------------|
| Data collection forms                    | Summary table of all forms used for data collection at each point of study                                                                     | Tables 1 and 2               |
| Informed consent forms                   | Sample of informed consent form, translated into local language                                                                                | NA                           |
| Funding                                  | Source of funding and the role of the funders for the present study                                                                            | Page 5                       |
| Acknowledgement for protocol development | Acknowledgement of persons involved in protocol preparation                                                                                    | Page 23                      |
| Data sharing policy                      | To describe how data will be made available in public domain.                                                                                  | NA                           |
| Contributions of authors to protocol     | Listed authors should have participated sufficiently in preparation of protocol with details of their contribution.                            | Page 23                      |
| Trial registry                           | For observational studies also registered as trial                                                                                             | Page 7                       |
| Annexures                                | Data collection form /instruments<br>Informed consent form<br>Standard operating procedures (SOPs)<br>Detailed Statistical analysis plan (SAP) | NA<br>NA<br>Tables 1-2<br>NA |

1  
2  
3  
4  
5  
6  
7  
8  
9  
10  
11  
12  
13  
14  
15  
16  
17  
18  
19  
20  
21  
22  
23  
24  
25  
26  
27  
28  
29  
30  
31  
32  
33  
34  
35  
36  
37  
38  
39  
40  
41  
42  
43  
44  
45  
46

# BMJ Open

## A Longitudinal Cohort Study Investigating Neurodevelopmental and Socio-emotional Outcomes in School-Entry aged Children after Open Heart Surgery in Australia and New Zealand: The NITRIC Follow-up Study Protocol

|                               |                                                                                                                                                                                                                                                                                                                                                                                                                                                                                                                                                                                                                                                                                                                                                                                                                                                                                                                                                                                                                                                                                                                                                                                                                                                                                                                                                                                                                                                                                                                                                                                                                                                                                                                                                                                                                                                                                                                                                                                                                                                                                                                                                                                                                                                                                                                                                                            |
|-------------------------------|----------------------------------------------------------------------------------------------------------------------------------------------------------------------------------------------------------------------------------------------------------------------------------------------------------------------------------------------------------------------------------------------------------------------------------------------------------------------------------------------------------------------------------------------------------------------------------------------------------------------------------------------------------------------------------------------------------------------------------------------------------------------------------------------------------------------------------------------------------------------------------------------------------------------------------------------------------------------------------------------------------------------------------------------------------------------------------------------------------------------------------------------------------------------------------------------------------------------------------------------------------------------------------------------------------------------------------------------------------------------------------------------------------------------------------------------------------------------------------------------------------------------------------------------------------------------------------------------------------------------------------------------------------------------------------------------------------------------------------------------------------------------------------------------------------------------------------------------------------------------------------------------------------------------------------------------------------------------------------------------------------------------------------------------------------------------------------------------------------------------------------------------------------------------------------------------------------------------------------------------------------------------------------------------------------------------------------------------------------------------------|
| Journal:                      | <i>BMJ Open</i>                                                                                                                                                                                                                                                                                                                                                                                                                                                                                                                                                                                                                                                                                                                                                                                                                                                                                                                                                                                                                                                                                                                                                                                                                                                                                                                                                                                                                                                                                                                                                                                                                                                                                                                                                                                                                                                                                                                                                                                                                                                                                                                                                                                                                                                                                                                                                            |
| Manuscript ID                 | bmjopen-2023-075429.R2                                                                                                                                                                                                                                                                                                                                                                                                                                                                                                                                                                                                                                                                                                                                                                                                                                                                                                                                                                                                                                                                                                                                                                                                                                                                                                                                                                                                                                                                                                                                                                                                                                                                                                                                                                                                                                                                                                                                                                                                                                                                                                                                                                                                                                                                                                                                                     |
| Article Type:                 | Protocol                                                                                                                                                                                                                                                                                                                                                                                                                                                                                                                                                                                                                                                                                                                                                                                                                                                                                                                                                                                                                                                                                                                                                                                                                                                                                                                                                                                                                                                                                                                                                                                                                                                                                                                                                                                                                                                                                                                                                                                                                                                                                                                                                                                                                                                                                                                                                                   |
| Date Submitted by the Author: | 08-Aug-2023                                                                                                                                                                                                                                                                                                                                                                                                                                                                                                                                                                                                                                                                                                                                                                                                                                                                                                                                                                                                                                                                                                                                                                                                                                                                                                                                                                                                                                                                                                                                                                                                                                                                                                                                                                                                                                                                                                                                                                                                                                                                                                                                                                                                                                                                                                                                                                |
| Complete List of Authors:     | <p>Long, Debbie; Queensland University of Technology, School of Nursing; Queensland Children's Hospital, Paediatric Intensive Care Unit<br/>           Anderson, Vicki; Murdoch Children's Research Institute, Clinical Sciences; Royal Children's Hospital, Psychology Service<br/>           Crossley, Louise; Murdoch Children's Research Institute, Clinical Sciences<br/>           Sood, Nikita; Murdoch Children's Research Institute, Clinical Sciences<br/>           Charles, Karina; Queensland Children's Hospital, Paediatric Intensive Care Unit; Queensland University of Technology, School of Nursing<br/>           MacDonald, Anna; The University of Queensland, Child Health Research Centre<br/>           Bora, Samudragupta; University Hospitals Rainbow Babies &amp; Children's Hospital, Case Western Reserve University School of Medicine; The University of Queensland, Mater Research Institute<br/>           Pestell, Carmela; University of Western Australia, School of Psychological Science<br/>           Murrell, Kathryn; Starship Children's Hospital<br/>           Pride, Natalie; The Children's Hospital at Westmead, Kids Neuroscience Centre<br/>           Anderson, Peter; Monash University, Turner Institute for Brain and Mental Health<br/>           Badawi, Nadia; The Children's Hospital at Westmead, Grace Centre for Newborn Care<br/>           Rose, Brian; The University of Queensland, Child Health Research Centre; HeartKids Australia Inc, Australian and New Zealand Fontan Advocacy Committee<br/>           Baillie, Heidi; The Children's Hospital at Westmead, Paediatric Intensive Care Unit<br/>           Masterson, Kate; Royal Children's Hospital, Paediatric Intensive Care Unit; Murdoch Children's Research Institute, Clinical Sciences<br/>           Chumbes Flores, Jenipher; Perth Children's Hospital, Paediatric Intensive Care Unit<br/>           Sherring, Claire; Starship Children's Hospital, Paediatric Intensive Care Unit<br/>           Raman, Sainath; Queensland Children's Hospital, Paediatric Intensive Care Unit; The University of Queensland, Child Health Research Centre<br/>           Beca, John; Starship Children's Hospital, Paediatric Intensive Care Unit<br/>           Erickson, Simon; Perth Children's Hospital, Paediatric Intensive Care Unit</p> |

|                                 |                                                                                                                                                                                                                                                                                                                                                                                                                                                                                                                                                                                                                                                                                                                                                                                                                                                                                                                                                                                                                                                                                                                                                                                                                                                                                                                                                                                                                                                                                                                                                                                                                                                                                                                                                       |
|---------------------------------|-------------------------------------------------------------------------------------------------------------------------------------------------------------------------------------------------------------------------------------------------------------------------------------------------------------------------------------------------------------------------------------------------------------------------------------------------------------------------------------------------------------------------------------------------------------------------------------------------------------------------------------------------------------------------------------------------------------------------------------------------------------------------------------------------------------------------------------------------------------------------------------------------------------------------------------------------------------------------------------------------------------------------------------------------------------------------------------------------------------------------------------------------------------------------------------------------------------------------------------------------------------------------------------------------------------------------------------------------------------------------------------------------------------------------------------------------------------------------------------------------------------------------------------------------------------------------------------------------------------------------------------------------------------------------------------------------------------------------------------------------------|
|                                 | <p>Festa, Marino; The Children's Hospital at Westmead, Paediatric Intensive Care Unit</p> <p>Anderson, Benjamin; Queensland Children's Hospital, Queensland Paediatric Cardiac Service; The University of Queensland, School of Medicine</p> <p>Venugopal, Prem; Queensland Children's Hospital, Department for Cardiac Surgery; The University of Queensland, School of Medicine</p> <p>Yim, Deane; Perth Children's Hospital, Department of Paediatric Cardiology</p> <p>Andrews, David; Perth Children's Hospital, Department of Cardiothoracic Surgery</p> <p>Cheung, Michael; Royal Children's Hospital, Department of Cardiology; Murdoch Children's Research Institute, Clinical Sciences</p> <p>Brizard, Christian; Royal Children's Hospital, Department of Cardiac Surgery; Murdoch Children's Research Institute, Clinical Sciences</p> <p>Gentles, Thomas; Starship Children's Health, Paediatric and Congenital Cardiac Service; The University of Auckland, Paediatrics, Child and Youth Health</p> <p>Iyengar, Ajay; Starship Children's Hospital, Paediatric and Congenital Cardiac Service; The University of Auckland, Department of Surgery</p> <p>Nicholson, Ian; The Children's Hospital at Westmead, Heart Centre for Children</p> <p>Ayer, Julian; The Children's Hospital at Westmead, Heart Centre for Children</p> <p>Butt, Warwick; Royal Children's Hospital, Paediatric Intensive Care Unit; Murdoch Children's Research Institute, Clinical Sciences</p> <p>Schlapbach, Luregn; The University of Queensland, Child Health Research Centre; University Children's Hospital Zürich, Department of Intensive Care and Neonatology</p> <p>Gibbons, Kristen; The University of Queensland, Child Health Research Centre</p> |
| <b>Primary Subject Heading</b>: | Paediatrics                                                                                                                                                                                                                                                                                                                                                                                                                                                                                                                                                                                                                                                                                                                                                                                                                                                                                                                                                                                                                                                                                                                                                                                                                                                                                                                                                                                                                                                                                                                                                                                                                                                                                                                                           |
| Secondary Subject Heading:      | Cardiovascular medicine, Intensive care                                                                                                                                                                                                                                                                                                                                                                                                                                                                                                                                                                                                                                                                                                                                                                                                                                                                                                                                                                                                                                                                                                                                                                                                                                                                                                                                                                                                                                                                                                                                                                                                                                                                                                               |
| Keywords:                       | Congenital heart disease < CARDIOLOGY, Paediatric intensive & critical care < ANAESTHETICS, Developmental neurology & neurodisability < PAEDIATRICS, Paediatric cardiology < CARDIOLOGY, Paediatric cardiac surgery < PAEDIATRIC SURGERY                                                                                                                                                                                                                                                                                                                                                                                                                                                                                                                                                                                                                                                                                                                                                                                                                                                                                                                                                                                                                                                                                                                                                                                                                                                                                                                                                                                                                                                                                                              |
|                                 |                                                                                                                                                                                                                                                                                                                                                                                                                                                                                                                                                                                                                                                                                                                                                                                                                                                                                                                                                                                                                                                                                                                                                                                                                                                                                                                                                                                                                                                                                                                                                                                                                                                                                                                                                       |

SCHOLARONE™  
Manuscripts

**Title Page:****A Longitudinal Cohort Study Investigating Neurodevelopmental and Socio-emotional Outcomes in School-Entry aged Children after Open Heart Surgery in Australia and New Zealand: The NITRIC Follow-up Study Protocol**

Debbie Long<sup>1,2</sup>, Vicki A Anderson<sup>3,4</sup>, Louise H Crossley<sup>3</sup>, Nikita Tuli Sood<sup>3</sup>, Karina R Charles<sup>1,2</sup>, Anna D MacDonald<sup>5</sup>, Samudragupta Bora<sup>6,7</sup>, Carmela F Pestell<sup>8</sup>, Kathryn Murrell<sup>9</sup>, Natalie Pride<sup>10</sup>, Peter J Anderson<sup>11</sup>, Nadia Badawi<sup>12</sup>, Brian Rose<sup>13,14</sup>, Heidi Baillie<sup>15</sup>, Kate Masterson<sup>3,16</sup>, Jenipher Chumbes Flores<sup>17</sup>, Claire Sherring<sup>18</sup>, Sainath Raman<sup>2,5</sup>, John Beca<sup>18</sup>, Simon Erickson<sup>17</sup>, Marino S Festa<sup>15</sup>, Benjamin W Anderson<sup>19,20</sup>, Prem Venugopal<sup>20,21</sup>, Deane Yim<sup>22</sup>, David Andrew<sup>23</sup>, Michael M H Cheung<sup>24,25</sup>, Christian P Brizard<sup>25,26</sup>, Thomas L Gentles<sup>27,28</sup>, Ajay Iyengar<sup>28,29</sup>, Ian A Nicholson<sup>30</sup>, Julian Ayer<sup>30</sup>, Warwick Butt<sup>3,16</sup>, Luregn J Schlapbach<sup>5,31</sup>, Kristen S Gibbons<sup>5</sup>, and The NITRIC Follow-up Study Group, and The Australian and New Zealand Intensive Care Society (ANZICS) Paediatric Study Group (PSG)

<sup>1</sup> School of Nursing, Centre for Healthcare Transformation, Queensland University of Technology, Kelvin Grove, QLD, Australia

<sup>2</sup> Paediatric Intensive Care Unit, Queensland Children's Hospital, South Brisbane, QLD Australia

<sup>3</sup> Clinical Sciences, Murdoch Children's Research Institute, Parkville, VIC, Australia

<sup>4</sup> Psychology Service, Royal Children's Hospital Melbourne, Parkville, VIC, Australia

<sup>5</sup> Child Health Research Centre, The University of Queensland, Brisbane, QLD, Australia

<sup>6</sup> Department of Pediatrics, University Hospitals Rainbow Babies & Children's Hospital, Case Western Reserve University School of Medicine, Cleveland, OH, United States

1  
2  
3 <sup>7</sup> Mater Research Institute, Faculty of Medicine, The University of Queensland, Brisbane,  
4  
5 QLD, Australia

6  
7 <sup>8</sup> School of Psychological Science, University of Western Australia, Crawley, WA, Australia

8  
9 <sup>9</sup> Starship Children's Hospital, Auckland, New Zealand

10  
11 <sup>10</sup> Kids Neuroscience Centre, The Children's Hospital at Westmead, Westmead, NSW,  
12  
13 Australia

14  
15  
16 <sup>11</sup> Turner Institute for Brain and Mental Health, School of Psychological Sciences, Monash  
17  
18 University, Clayton, VIC, Australia

19  
20  
21 <sup>12</sup> Grace Centre for Newborn Care, The Children's Hospital at Westmead, Westmead, NSW,  
22  
23 Australia

24  
25  
26 <sup>13</sup> Consumer Representative, Child Health Research Centre, The University of Queensland,  
27  
28 South Brisbane, QLD, Australia

29  
30  
31 <sup>14</sup> Australian and New Zealand Fontan Advocacy Committee, HeartKids Ltd, Sydney, NSW,  
32  
33 Australia

34  
35  
36 <sup>15</sup> Paediatric Intensive Care Unit, The Children's Hospital at Westmead, Westmead, NSW,  
37  
38 Australia

39  
40 <sup>16</sup> Paediatric Intensive Care Unit, Royal Children's Hospital, Parkville, VIC, Australia

41  
42 <sup>17</sup> Paediatric Intensive Care Unit, Perth Children's Hospital, Nedlands, WA, Australia

43  
44 <sup>18</sup> Paediatric Intensive Care Unit, Starship Children's Hospital, Auckland, New Zealand

45  
46  
47 <sup>19</sup> Queensland Paediatric Cardiac Service, Children's Health Queensland Hospital and Health  
48  
49 Service, South Brisbane, QLD, Australia

50  
51 <sup>20</sup> School of Medicine, The University of Queensland, South Brisbane, QLD, Australia

52  
53  
54 <sup>21</sup> Department for Cardiac Surgery, Queensland Children's Hospital, Brisbane, QLD,  
55  
56 Australia

57  
58 <sup>22</sup> Department of Paediatric Cardiology, Perth Children's Hospital, Nedlands, WA, Australia

59  
60 <sup>23</sup> Department of Cardiothoracic Surgery, Perth Children's Hospital, Nedlands, WA, Australia



1  
2  
3 <sup>24</sup> Department of Cardiology, Royal Children's Hospital, Parkville, VIC, Australia

4  
5 <sup>25</sup> Murdoch Children's Research Institute, Parkville, VIC, Australia

6  
7 <sup>26</sup> Department of Cardiac Surgery, Royal Children's Hospital, Parkville, VIC, Australia

8  
9  
10 <sup>27</sup> Paediatric and Congenital Cardiac Service, Starship Children's Hospital, Auckland, New  
11 Zealand

12  
13  
14 <sup>28</sup> Paediatrics, Child and Youth Health, University of Auckland, Auckland, New Zealand

15  
16  
17 <sup>29</sup> Department of Surgery, University of Auckland, Auckland, New Zealand

18  
19  
20 <sup>30</sup> Heart Centre for Children, The Children's Hospital at Westmead, Westmead, NSW,  
21 Australia

22  
23  
24 <sup>31</sup> Department of Intensive Care and Neonatology, Children's Research Centre, University  
25 Children's Hospital Zurich, Zurich, Switzerland

### 26 27 28 29 30 **The NITRIC Follow-up Study Group**

31  
32 Kristen S Gibbons, Luregn J Schlapbach, Samudragupta Bora, Devika Ganesamoorthy, Anna  
33 D MacDonald, Antje Blumenthal, Trang M T Pham, Endrias Ergetu, The University of  
34 Queensland, Brisbane, Australia; Debbie Long, Queensland University of Technology,  
35 Brisbane, Australia; Sainath Raman, Karina R Charles, Prem Venugopal, Benjamin W  
36 Anderson, Queensland Children's Hospital, Brisbane, Australia; Warwick Butt, Vicki A  
37 Anderson, Kate Masterson, Jenni Braeutigam, Michael M H Cheung, Christian P Brizard,  
38 Royal Children's Hospital, Melbourne, Australia; Peter J Anderson, Monash University,  
39 Melbourne, Australia; Lachlan Coin, University of Melbourne, Melbourne, Australia; Simon  
40 Erickson, Carmela F Pestell, Jenipher Chumbes Flores, Deane Yim, David Andrews, Perth  
41 Children's Hospital, Perth, Australia; Marino S Festa, Nadia Badawi, Natalie Pride, Heidi  
42 Baillie, Jennifer Darvas, Ian A Nicholson, Julian Ayer, The Children's Hospital at Westmead,  
43 Sydney, Australia; John Beca, Kathryn Murrell, Laura Brown, Claire Sherring, Shelley  
44  
45  
46  
47  
48  
49  
50  
51  
52  
53  
54  
55  
56  
57  
58  
59  
60

1  
2  
3 Coetzer, Thomas L Gentles, Ajay Iyengar, Starship Children's Hospital, Auckland, New  
4  
5 Zealand; and Brian Rose, Holly Williams, Consumer Representatives.  
6  
7  
8

9  
10 **The ANZICS PSG**

11 Breanna Pellegrini, Australian and New Zealand Paediatric Intensive Care Registry; Shane  
12  
13 George, Gold Coast University Hospital, Gold Coast, Australia; Corrine Balit, John Hunter  
14  
15 Hospital, Newcastle, Australia; Felix Oberender, Monash Children's Hospital, Melbourne,  
16  
17 Australia; Simon Erickson, Jenipher Chumbes Flores, Perth Children's Hospital, Perth,  
18  
19 Australia; Karina Charles, Sainath Raman, Michaela Waak, Queensland Children's Hospital,  
20  
21 Brisbane, Australia; Debbie Long, Queensland University of Technology, Brisbane,  
22  
23 Australia; Warwick Butt (Chair), Carmel Delzoppo, Ben Gelbart, Kate Masterson, Johnny  
24  
25 Millar, Royal Children's Hospital, Melbourne, Australia; Anusha Ganeshalingam, Claire  
26  
27 Sherring, Starship Children's Hospital, Auckland, New Zealand; Puneet Singh, Vicky Smith,  
28  
29 Sydney Children's Hospital, Randwick, Australia; Kristen Gibbons, Luregn Schlapbach (Past  
30  
31 Chair), Jessica Schults, The University of Queensland, Brisbane, Australia; and Jennifer  
32  
33 Darvas, Marino Festa, The Children's Hospital at Westmead, Sydney, Australia.  
34  
35  
36  
37  
38  
39  
40  
41

42 **Corresponding Author:**

43 A/Prof Kristen Gibbons, PhD

44 Child Health Research Centre, The University of Queensland

45  
46 62 Graham St, South Brisbane, Queensland, 4101, Australia

47  
48  
49 Email: [k.gibbons@uq.edu.au](mailto:k.gibbons@uq.edu.au); Phone: +61 407 966 708  
50  
51  
52  
53  
54

55 **Competing Interests Statement:**

56  
57 None declared.  
58  
59  
60

1  
2  
3 **Key words:** child; congenital heart disease; cognition; behavior; neurodevelopment;  
4 trajectories; phenotype; preschool; school readiness; screening; latent effects  
5  
6  
7

8  
9 **Funding:** This work is supported by grants from the Medical Research Future Fund  
10 (ARGCHDG000036), Australia; the Children's Hospital Foundation, Australia; the Starship  
11 Foundation (SF4226), New Zealand; and the Green Lane Research and Educational Fund  
12 Foundation (SF4226), New Zealand; and the Green Lane Research and Educational Fund  
13 Foundation (SF4226), New Zealand; and the Green Lane Research and Educational Fund  
14 Foundation (SF4226), New Zealand. VA is supported by a National Health and Medical Research  
15 Foundation (21/22/4158), New Zealand. VA is supported by a National Health and Medical Research  
16 Council (Australia) Investigator Grant. The funding sources were not involved in study design,  
17 analyses, nor interpretation of the results.  
18  
19  
20  
21  
22  
23  
24

25 **Word Count:** 3571  
26  
27  
28  
29  
30  
31  
32  
33  
34  
35  
36  
37  
38  
39  
40  
41  
42  
43  
44  
45  
46  
47  
48  
49  
50  
51  
52  
53  
54  
55  
56  
57  
58  
59  
60

## Abstract

**Introduction:** Despite growing awareness of neurodevelopmental impairments in children with congenital heart disease (CHD), there is a lack of large, longitudinal, population-based cohorts. Little is known about the contemporary neurodevelopmental profile and the emergence of specific impairments in children with CHD entering school. The performance of standardized screening tools to predict neurodevelopmental outcomes at school age in this high-risk population remains poorly understood. The NITric oxide during cardiopulmonary bypass to improve Recovery in Infants with Congenital heart defects (NITRIC) trial randomized 1371 children <2 years of age, investigating the effect of gaseous nitric oxide applied into the cardiopulmonary bypass oxygenator during heart surgery. The NITRIC Follow-Up Study will follow this cohort annually until 5 years of age to assess outcomes related to cognition and socioemotional behavior at school entry, identify risk factors for adverse outcomes, and evaluate the performance of screening tools.

**Methods and analysis:** Approximately 1150 children from the NITRIC trial across 5 sites in Australia and New Zealand will be eligible. Follow-up assessments will occur in two stages: i) annual online screening of global neurodevelopment, socioemotional and executive functioning, health-related quality of life and parenting stress at ages 2-5 years; and ii) face-to-face assessment at age 5 years assessing intellectual ability, attention, memory, and processing speed; fine motor skills; language and communication; and socioemotional outcomes. Cognitive and socioemotional outcomes and trajectories of neurodevelopment will be described and demographic, clinical, genetic and environmental predictors of these outcomes will be explored.

**Ethics and dissemination:** Ethical approval has been obtained from the Children's Health Queensland (HREC/20/QCHQ/70626) and New Zealand Health and Disability (21/NTA/83)

1  
2  
3 Research Ethics Committees. The findings will inform the development of clinical decision  
4  
5 tools and improve preventative and intervention strategies in children with CHD.  
6  
7 Dissemination of the outcomes of the study is expected via publications in peer-reviewed  
8  
9 journals, presentation at conferences, via social media, podcast presentations and medical  
10  
11 education resources, and through CHD family partners.  
12  
13  
14  
15

16 **Registration details:** The trial was prospectively registered with the Australian New Zealand  
17  
18 Clinical Trials Registry as “Gene Expression to Predict Long-Term Neurodevelopmental  
19  
20 Outcome in Infants from the NITric oxide during cardiopulmonary bypass to improve  
21  
22 Recovery in Infants with Congenital heart defects (NITRIC) Study – A Multicentre Prospective  
23  
24 Trial.” Trial Registration: ACTRN12621000904875  
25  
26  
27  
28  
29  
30  
31  
32  
33  
34  
35  
36  
37  
38  
39  
40  
41  
42  
43  
44  
45  
46  
47  
48  
49  
50  
51  
52  
53  
54  
55  
56  
57  
58  
59  
60

## ARTICLE SUMMARY

### Strengths and Limitations of this Study

- The use of a longitudinal cohort design based on a large high-quality pragmatic trial with broad inclusion criteria to map neurodevelopmental outcomes will help to improve prediction and early identification of children at risk for poor outcomes following cardiopulmonary bypass surgery for congenital heart disease.
- The NITRIC Follow-Up Study data will be combined with prospective well characterized datasets on clinical, socioeconomic, and biological variables, including multi-omics obtained pre and post CPB.
- CHD families, clinicians and other stakeholders have co-designed the NITRIC Follow-Up sStudy methods, ensuring the project is meaningful to CHD families and has the potential to optimise neurodevelopment in children following open heart surgery
- Limitations of this study are the sensitivity to loss to follow-up of participants and potential variations in follow-up timings.

## INTRODUCTION

One out of every 200 children is born with congenital heart disease (CHD) requiring surgery during childhood. Over the past two decades considerable improvements have been achieved in relation to survival following pediatric cardiac surgery, resulting in decreasing mortality rates for most lesions (1-3). Correspondingly, the number of children surviving with CHD has been rapidly increasing with a rising proportion of complex CHD. The burden and cost of physical and neurological morbidities in CHD survivors are forecast to represent a major challenge for healthcare systems in the coming decades (4).

Neurodevelopmental disabilities remain amongst the most common, and the most serious, sequelae in children undergoing surgery for CHD (5). These can manifest as cognitive impairment, speech and language difficulties, visuo-spatial and visuo-motor challenges, attention deficits, motor delays, socioemotional problems, secondary learning disabilities and reduced quality of life (QoL) (6, 7). Early post-operative assessment after infant surgery often reveals abnormalities in muscle tone, poor suck and swallow, and feeding difficulties (8, 9). However, developmental milestones show wide variation, with distinction between children with delayed development who will 'catch-up' to their peers and those who will experience persistent impairments remaining a major challenge (10, 11). The full extent of neurodevelopmental sequelae may only manifest once children reach school age (11, 12). If not detected and managed early, these sequelae may translate into secondary academic problems and reduced quality of life, with long-lasting consequences for the patient, family, future offspring, and society. Furthermore, these represent a major contributor to excessive longer-term health costs, which are usually unaccounted for in health economic models (13). To optimise outcomes for all children with CHD, early identification and appropriate supportive and/or rehabilitative management of children at risk for neurodevelopmental difficulties are essential. Historically, neurodevelopmental studies in other at-risk populations,

1  
2 such as preterm infants, have focused on the detection of moderate to severe impairment (e.g.,  
3 cerebral palsy, blindness, deafness) (14). An evolving landscape now acknowledges the  
4 importance of more subtle outcomes, including milder degrees of impairment which will have  
5 a significant influence on everyday functioning and quality of life (15). In particular, two recent  
6 systematic reviews have demonstrated consistent evidence for executive function impairment  
7 in school-aged children with CHD, underscoring the lifelong impact of CHD and the need for  
8 follow-up (16, 17). Despite the median age at follow-up in these papers being closer to high  
9 school age, the American Heart Association guidelines recommend starting screening for  
10 executive function at 6 years of age (18). Moreover, problems may present prior to formal  
11 schooling, therefore earlier screening may be beneficial. Executive functions begin to emerge  
12 during infancy and are core skills critical for the life-course, including success in school and in  
13 life (19).

14  
15  
16  
17  
18  
19  
20  
21  
22  
23  
24  
25  
26  
27  
28  
29  
30  
31  
32 Over the last decade, research has identified a range of neurodevelopmental impairments in  
33 children with CHD and, at the same time, highlighted some distinct CHD outcome patterns.  
34 Whilst the prevalence of severe cognitive impairment in children with CHD has declined,  
35 deficits in multiple cognitive and psychosocial domains are increasingly observed (20-22).  
36 Several studies have shown that even children whose intelligence quotient falls within the  
37 normal range may exhibit pervasive but subtle neuropsychological weaknesses, which are often  
38 underestimated or go undetected (23-26). Emerging data show that, while severity of CHD is  
39 associated with outcome, patients with both univentricular and biventricular surgeries  
40 demonstrate variable neurodevelopmental outcomes (21, 27). These impairments in children  
41 with CHD are important indicators of school readiness, with increasing awareness of the need  
42 to obtain an adequate developmental assessment before school entry so that education, family  
43 and child supports can be put into place to optimise outcomes (28). In addition to events  
44 surrounding cardiac surgery, research increasingly demonstrates that prenatal, patient-specific



1  
2 and environmental factors, including socioeconomic status, play a large role in determining the  
3  
4 outcomes of children with CHD (22, 29) and may contribute to identifying those at risk for  
5  
6 poor neurodevelopmental outcomes.  
7  
8  
9

10  
11 In order to design and evaluate strategies which can mitigate the impact of CHD on  
12  
13 neurocognitive outcomes, a better understanding of the risk factors and contemporary  
14  
15 trajectories in these patients is urgently needed. At present, it remains unclear which tools, at  
16  
17 which specific time points, have the best performance to predict child outcomes at school entry  
18  
19 (30). The Cardiac Neurodevelopmental Outcome Collaborative (CNOC), an international  
20  
21 multidisciplinary group committed to optimizing neurodevelopmental outcomes for children  
22  
23 with CHD, has recently recommended for future research to prioritize longitudinal trajectories  
24  
25 of CHD, designed to identify socioemotional phenotypes and evaluate the effects of early risk  
26  
27 factors on later outcomes including clinical, genetic, socioeconomic, sex and ethnic factors  
28  
29 (31). Such a nuanced characterisation of CHD will require adequately powered, large,  
30  
31 contemporary, longitudinal cohorts representative of the CHD population with a high  
32  
33 granularity of clinical and follow-up data.  
34  
35  
36  
37  
38  
39  
40

41  
42 Between 2017 and 2021, the NITric oxide during cardiopulmonary bypass to improve  
43  
44 Recovery in Infants with Congenital heart defects (NITRIC) trial recruited 1371 infants less  
45  
46 than 2 years of age undergoing CPB surgery and represents the largest randomized controlled  
47  
48 trial (RCT) in the field of CHD to date. This RCT evaluated if the addition of nitric oxide into  
49  
50 the CPB oxygenator would result in more ventilator-free days compared to standard CPB. The  
51  
52 protocol (32), analysis plan (33) and 28-day outcomes (34) of this study have been reported  
53  
54 previously. The NITRIC trial represents a unique population-based and well characterized  
55  
56 large contemporary cohort of CHD children undergoing CPB. The NITRIC Follow-Up Study  
57  
58 has been designed to follow-up the NITRIC trial cohort to address significant gaps in  
59  
60

1  
2  
3 knowledge of neurodevelopmental outcomes associated with CHD as children approach school  
4  
5 age, and to explore associations of outcome with the host response to CPB assessed by  
6  
7 transcriptomics and other biochemical markers. Below we describe the protocol to follow up  
8  
9 the NITRIC trial cohort from 2 to 5 years of age.  
10  
11  
12  
13

## 14 **Aims**

15  
16 The primary objective of the NITRIC Follow-Up Study is to improve the prediction and early  
17  
18 identification of children at risk for poor developmental outcomes following CPB surgery for  
19  
20 CHD, using a comprehensive protocol of age-appropriate standardized assessments. The study  
21  
22 has four aims:  
23  
24

- 25 1. Map the neurodevelopmental, executive function and socioemotional trajectories  
26 following CPB surgery for CHD from 2 to 5 years of age.  
27
- 28 2. Explore CHD neurodevelopmental and socioemotional phenotypes at 5 years.  
29
- 30 3. Determine whether neurodevelopmental screening from 2 to 5 years of age predicts  
31 outcomes for children with CHD once they reach school age.  
32
- 33 4. Identify sociodemographic, parent, child, disease, biochemical, and treatment factors  
34 that differentiate neurodevelopmental and socioemotional outcomes following CPB  
35 surgery.  
36  
37  
38  
39  
40  
41  
42  
43  
44  
45

## 46 **METHODS AND ANALYSIS**

### 47 **Study Design**

48  
49 This is a prospective multicenter, international, longitudinal follow-up study of the NITRIC  
50  
51 trial cohort. The results of this study will be reported according to the Strengthening the  
52  
53 Reporting of Observational Studies in Epidemiology (STROBE) checklist (35) or respective  
54  
55 reporting guidelines for specific nested studies.  
56  
57  
58  
59  
60

## Participants

Children who underwent CPB surgery for CHD prior to 2 years of age and participated in the NITRIC trial (34). Children were recruited prior to surgery from six tertiary pediatric hospitals in Australia, New Zealand and the Netherlands between 2017 and 2021. In the NITRIC Follow-Up Study, we anticipate that 1150 surviving children from Australian and New Zealand sites will be eligible to participate. Children from the Netherlands may be included in future iterations of this protocol.

## Recruitment Procedure

Parents of eligible children will be invited to participate in annual online assessments from 2 (2 years 0 months) to 5 years (5 years 11 months) of age. Due to the variation in age at recruitment (0 to 2 years) and the four-year conduct of the original NITRIC trial, some children may participate in as few as one, and others in as many as four, annual assessments. Following annual assessment at age 5, families will be asked to have their child participate in a face-to-face comprehensive neurodevelopmental assessment, and parents will complete a battery of questionnaires. Acknowledging a small number of children may have already turned 5 at study commencement, to ensure inclusiveness we will allow the 5 year online and face-to-face assessments to occur in children up to 6 years 11 months.

Prior to the initial contact, site research coordinators will review patient records to ensure the child is not deceased, and then provide eligible families with information about the NITRIC Follow-Up Study and a link to an informational video (<https://www.nitricfollowup.com/>). Coordinators will contact parents who indicate willingness to participate to further explain the study. Consent for completion of each annual questionnaire will be implied on return of the questionnaire. Parents will be contacted to verbally reconfirm their willingness to participate

1  
2 at each annual timepoint. Parents will be asked to provide written consent for the face-to-face  
3  
4 neurodevelopmental assessment.  
5  
6  
7  
8

## 9 **Measures**

### 10 *Demographic and clinical information*

11  
12 At their first annual online screening, parents will complete a study-specific demographic  
13  
14 survey which includes sex, age, ethnicity, highest education, living arrangements, relationship  
15  
16 status, number of children in their care and languages spoken. Each subsequent annual  
17  
18 questionnaire will ask parents to document any changes in demographic status. Socio-  
19  
20 economic status will be determined using the Socio-Economic Indexes for Areas – Index of  
21  
22 Relative Socio-economic Disadvantage (SEIFA IRSD) deciles and The New Zealand Index of  
23  
24 Deprivation (NZDep) derived from the postcode recorded at PICU admission (36, 37).  
25  
26 Postcode will also be used to determine regionality, using the Australian Bureau of Statistics'  
27  
28 5 classes of remoteness (Accessibility and Remoteness Index of Australia [ARIA]) and the  
29  
30 Statistics New Zealand Urban Rural 2018 Classification (38, 39). Clinical information  
31  
32 pertaining to the child's surgery and PICU admission has been recorded prospectively as part  
33  
34 of the NITRIC study and includes diagnosis, CPB and surgical characteristics, severity, and  
35  
36 treatments in PICU, and PICU and hospital length of stay.  
37  
38  
39  
40  
41  
42  
43  
44  
45

### 46 *Follow-up Assessments*

47  
48 The annual screening questionnaire and the face-to-face follow-up were designed in  
49  
50 consultation with the multidisciplinary study team, considering measure's reliability and  
51  
52 validity, relevance to the CHD literature (40) and subsequent discussion with CHD family  
53  
54 representatives.  
55  
56  
57  
58  
59  
60

1  
2  
3 *Annual online screening:* Parents will be contacted annually until the child's fifth birthday to  
4 complete the online screening questionnaire (telephone, tablet, laptop, computer) using a  
5 secure link to their electronic questionnaire and contact details of their recruiting site. The  
6 questionnaire will be individualized based on each child's chronological age and development  
7 as per the respective tool. One questionnaire will be completed per child by a primary caregiver.  
8  
9 The questionnaire takes approximately 45-60 minutes to complete and can be completed over  
10 several periods by returning to the saved questionnaire. In the case of parent comorbidity or  
11 circumstances limiting completion of the annual online screen, questionnaires will be  
12 administered via telephone interview by the research coordinator. Unless parents notify of their  
13 withdrawal from the study, attempts will be made to contact parents each year, even if the  
14 previous year's assessment was lost to follow-up. Supplemental Table S1 details the  
15 questionnaires included in annual screening assessments to be completed by parents. These  
16 measures assess child neurodevelopment, socioemotional status, quality of life, parent  
17 emotional well-being and parenting stress. We will also collect health service utilisation data,  
18 and any other major illnesses or surgery in the previous 12 months, via a study-specific survey.  
19  
20  
21  
22  
23  
24  
25  
26  
27  
28  
29  
30  
31  
32  
33  
34  
35  
36  
37  
38

39 *Face-to-face neuropsychological assessment:* Following the child's fifth birthday, a face-to-  
40 face child assessment will also be conducted. Parents will be asked to provide written consent  
41 to participate in this component of the study and an assessment appointment will be scheduled.  
42 Assessments will be conducted in outpatient clinics at recruiting sites or alternative sites to suit  
43 families. The face-to-face assessment will take 2-3 hours and will be divided into several  
44 sessions, with breaks according to the individual child's needs based on best  
45 neuropsychological practice. Order of assessment will be set, with the intellectual ability  
46 (Wechsler Preschool & Primary Scale of Intelligence) tool administered first. Missing data  
47 (due to child or parent disability or lack of cooperation) will be recorded and categorized.  
48 Supplemental Table S2 details the face-to-face test battery which focuses on direct assessment  
49  
50  
51  
52  
53  
54  
55  
56  
57  
58  
59  
60

1  
2 of children's overall intellectual ability (IQ) and targets cognitive domains vulnerable to early  
3 childhood brain insult including attention, language, memory, motor skills, and executive  
4 function. Parents will also rate their child's adaptive ability, socioemotional function, fatigue  
5 and parent-child attachment.  
6  
7  
8  
9  
10

## 11 12 13 14 **Sample Size**

15  
16 The sample size is determined by the existing cohort. Of the 1371 recruited participants for the  
17 NITRIC trial, seven did not ultimately undergo CPB surgery, 82 were recruited in The  
18 Netherlands, and 44 children are known to be deceased by day 28 post-surgery. Based on  
19 available literature on long-term mortality in infants with CHD (41), we estimate that 1150  
20 children will be eligible for inclusion in the NITRIC Follow-Up Study. Based on our previous  
21 experience and published reports of other follow-up cohorts (42, 43), we aim for an overall  
22 follow-up rate of 70% (n= 805) at the 5-year face-to-face assessment.  
23  
24  
25  
26  
27  
28  
29  
30  
31  
32  
33  
34

## 35 **Data Analysis**

### 36 *Cohort Description*

37  
38 Characteristics of the cohort will be presented descriptively, including comparison between  
39 responders and non-responders to assess potential bias.  
40  
41  
42  
43  
44  
45

### 46 *Outcomes*

47  
48 The outcomes for each of the assessments (Supplemental Tables S1 and S2) will be presented  
49 at each timepoint with the point estimate and measure of variation. In addition to continuous  
50 outcome measures, secondary analyses will use cut-offs to categorize outcomes. Comparison  
51 of outcomes against appropriate normative values will be undertaken.  
52  
53  
54  
55  
56  
57  
58  
59

### 60 *Developmental Trajectories*

1  
2  
3 Growth mixture models will be developed to investigate different post-surgery developmental  
4 profiles using data from the annual screening (Ages and Stages Questionnaire [ASQ] Total  
5 Score, Strengths and Difficulties Questionnaire [SDQ] Total Difficulties Score, and Behavior  
6 Rating Inventory for Executive Function for Pre-schoolers [BRIEF-P] Global Executive  
7 Composite Score) at 2, 3, 4, and 5 years of age. Child, parent, surgical, PICU treatment and  
8 sociodemographic factors known at the time of surgery, and collected during the NITRIC RCT,  
9 will be added to the model as covariates. Previous experience has demonstrated that variables  
10 from the NITRIC RCT have minimal missing data, however when missing data is evident,  
11 multiple imputation methods will be used for covariate data. The data will be explored  
12 graphically to determine the functional form, and a series of models will be developed and  
13 compared using the chi-squared difference tests (nested models) or another criterion (such as  
14 the Bayesian information criterion for non-nested models) to identify the number of  
15 trajectories.

#### 34 *Derivation of Neurodevelopmental and Socioemotional Phenotypes*

35  
36 To derive neurodevelopmental and socioemotional phenotypes at 5 years of age, the cohort  
37 will firstly be split into derivation and validation subsets (65:35 using a temporal split). We  
38 will ensure the subsets are balanced for the original intervention in the NITRIC trial to avoid  
39 bias by intervention, as well as the original NITRIC trial stratification variables (age group and  
40 cardiac pathophysiology). Outcomes from the assessments undertaken at 5 years of age (listed  
41 in Supplemental Table S2) will be used to derive neurodevelopmental and socioemotional  
42 phenotypes. These will include the language, attention, executive functioning, and memory,  
43 and social behavior and functioning domains. As such, the cohort will be restricted to children  
44 who have completed at least one assessment at the 5 years face-to-face visit. Where children  
45 have not completed the full assessment, multiple imputation will be used to impute missing  
46 outcome data. Descriptive analysis will firstly be performed to assess missingness, correlation  
47  
48  
49  
50  
51  
52  
53  
54  
55  
56  
57  
58  
59  
60

1  
2 and distribution, and to identify highly correlated outcomes. If two outcomes are highly  
3 correlated ( $r > 0.8$ ), only one will be retained in the clustering analysis to avoid redundancy.  
4  
5 Due to the potential for missing outcome data, multiple imputed datasets will be generated, and  
6  
7  $k$ -means clustering undertaken on each to assess stability. Standard indices will be used to  
8  
9 identify the optimal number of phenotypes (e.g., Silhouette index, Gap index, Dunn index),  
10  
11 and one set of phenotypes from the multiple imputed datasets used for the remaining analyses.  
12  
13 Graphical methods will be used to describe and visualize the composition of the phenotypes.  
14  
15 Latent class analysis will then be used to assess the reproducibility of the phenotypes within  
16  
17 the entire dataset.  
18  
19  
20  
21  
22  
23  
24

### 25 *Structural Equation Modelling*

26  
27 Structural equation modelling (SEM) will be used to examine the associations between the  
28  
29 neurodevelopmental screening outcomes from 2 to 5 years of age and neurodevelopmental  
30  
31 outcomes for children with CHD once they reach school age. Specifically, longitudinal panel  
32  
33 models will be developed to assess the continuity of the neurodevelopmental outcomes from 2  
34  
35 to 5 years, as well as their association with the neurodevelopmental outcomes assessed at aged  
36  
37 five. Missing data patterns will be explored and full information maximum likelihood  
38  
39 estimation methods will be used to produce unbiased parameter estimates in the presence of  
40  
41 missing data.  
42  
43  
44  
45  
46  
47

### 48 *Prediction Models*

49  
50 Mixed-effects models will be developed to investigate which individual, parent, surgical, PICU  
51  
52 treatment and sociodemographic factors known at the time of surgery are associated with both  
53  
54 neurodevelopmental and socioemotional outcomes, and derived phenotypes. The models will  
55  
56 account for risk factors for cognitive delays (identified through existing literature and clinical  
57  
58  
59  
60



1  
2  
3 judgement), the original NITRIC trial intervention and stratification variables (as fixed effects),  
4  
5 and study site (random effect).  
6  
7  
8

9  
10 In addition to the exploration of the impact of clinical and sociodemographic factors on  
11  
12 neurodevelopmental outcome, prediction models will be developed incorporating biomarkers  
13  
14 of host response to CPB. Transcriptomics data will be generated on the full cohort with  
15  
16 matched pre- and post-surgery samples and metabolomics data and proteomics data will be  
17  
18 generated on subset of cohort. We will use forward selection algorithms to identify variables  
19  
20 from each data set to discover novel biomarkers to predict patient outcomes after CPB. We will  
21  
22 also combine these datasets to derive a combination biomarker (including gene expression,  
23  
24 metabolites and proteins) to predict short-term and long-term patient outcomes.  
25  
26  
27  
28  
29

### 30 **Feasibility and Engagement**

31  
32 To maximize follow-up rates, we have developed detailed standardized training on a follow-  
33  
34 up delivery package for the study informed by published reports (44-47) including the  
35  
36 collection of detailed contact information, using systematic methods for patient contact,  
37  
38 visit/appointment scheduling and cohort retention monitoring (templates for telephone scripts  
39  
40 and written material); log of each contact attempt made to participants; providing reminders  
41  
42 about visits/appointments; providing benefits to children and families that are directly related  
43  
44 to the nature of the study (e.g. reports which can be shared with educators or healthcare  
45  
46 professionals); providing reimbursement for direct research-related expenses such as travel and  
47  
48 accommodation to facilitate participation; providing tokens of appreciation (developed in  
49  
50 consultation with family group); and procedures for escalating efforts to reach participants  
51  
52 (48), including varying contact modes and reminders.  
53  
54  
55  
56  
57  
58  
59  
60

#### *Assessment feedback for participants*

1  
2  
3 All parents will receive written results of their child's development from both the annual and  
4  
5 face-to-face assessments in a formal report. The annual report results will be articulated in  
6  
7 terms of performance ranges (i.e. within/below the range as same-aged peers) for each  
8  
9 assessment and emailed to parents at the completion of the online assessment. The report  
10  
11 includes a summary of the areas of development assessed and a guide for interpreting the  
12  
13 results. The face-to-face report will include an explanation of the areas assessed and will report  
14  
15 on each domain area, which will be summarized as below average, average or above average  
16  
17 for cognitive profiles and average or elevated for socioemotional profiles. If the assessment  
18  
19 results raise areas of concern not previously identified/diagnosed, parents are encouraged to  
20  
21 contact their primary healthcare providers to discuss the findings and options for referral to  
22  
23 appropriate services for further clinical neuropsychological testing as indicated. Reports have  
24  
25 been developed in consultation with the CHD family group.  
26  
27  
28  
29  
30  
31

### 32 **Patient and Public Involvement**

34  
35 The development of the research questions and outcome measures are based on the findings of  
36  
37 our previous research into long-term outcomes in critically ill cohorts (32, 49, 50). The  
38  
39 importance of long-term outcomes has been investigated by members of the research team  
40  
41 through national and international research (51, 52). Prior to study commencement, there has  
42  
43 been direct involvement of CHD families with lived experience in the development of study  
44  
45 materials, including the formal annual reports and further interviews and focus groups  
46  
47 exploring engagement in research, which will be published separately. CHD families have  
48  
49 assessed the burden of the follow-up questionnaires, the suitability of domains measured and  
50  
51 the acceptability of the annual report. Families will also advise on the dissemination strategy,  
52  
53 particularly in relation to participating families and community groups.  
54  
55  
56  
57  
58  
59

### 60 **Limitations**

1  
2  
3 This study has potential limitations. Firstly, cohort studies are sensitive to loss to follow-up of  
4 the participants. To address this, we have formulated a comprehensive follow-up quality  
5 control plan prior to study commencement and will explore patterns of lost to follow-up  
6 through sensitivity analyses. Provision of reports may also encourage parents to seek additional  
7 early support and intervention for their child, thus potentially changing the trajectory of  
8 outcomes (albeit positively); hence the collection of healthcare utilization data is an important  
9 inclusion in this study. Follow-up timing may range amongst participants; therefore we will  
10 include age at completion of assessments in statistical modelling.  
11  
12  
13  
14  
15  
16  
17  
18  
19  
20  
21  
22

### 23 **Contribution**

24  
25 This study also offers several strengths. First, the cohort is based on a large high-quality  
26 pragmatic trial with broad inclusion criteria offering approximation for population-based  
27 coverage, which is representative of the contemporary CHD population. Second, follow-up  
28 data will be combined with the prospective well characterized datasets on clinical,  
29 socioeconomic, and biological variables, including multi-omics obtained pre- and post-CPB.  
30 Furthermore, this cohort allows for exploring which sociodemographic variables predict  
31 neurodevelopment in a large binational cohort. This will enable us to control for their potential  
32 confounding effects on the association between risk factors and neurodevelopmental outcomes.  
33  
34 By integrating neurodevelopmental, socioemotional, functional and quality of life measures,  
35 we will undertake the largest population-based follow-up cohort of infants undergoing CPB  
36 for CHD and collect extensive patient- and family-centered outcomes between 2 and 5 years  
37 of age. Through the combination with biochemical data obtained pre- and post-CPB, the  
38 program will seek to unravel links between early host response to CPB and late outcomes. As  
39 a result, this study will assist us in identify the most informative time points and predictors to  
40 detect problems and the functions that are most at risk of impairment for these children.  
41  
42  
43  
44  
45  
46  
47  
48  
49  
50  
51  
52  
53  
54  
55  
56  
57  
58  
59  
60

## Data Management

A purpose-built REDCap™ database has been developed (hosted by The University of Queensland) to store participant information, administer annual assessments in survey form, and record outcomes of the face-to-face neuropsychological assessment. In-built dashboards have been developed to enable centralized, and site monitoring of recruitment and survey completion rates. Following principles of the International Council of Harmonisation, Good Clinical Practice (ICH-GCP) guidelines, a risk-based assessment has been undertaken to guide the development of the study monitoring plan.

## Study Oversight

A Steering Group has been established with clinical, long-term follow-up, data, consumer and research coordination representatives, and has oversight of the progress of the study, supported by a Research and Operations Manager. Whole program meetings will be convened during the study to update all program members on the progress of the study.

## Ethical Considerations

The study protocol has been approved by the Children's Health Queensland Human Research Ethics Committee (HREC/20/QCHQ/70626; original submission approved 21<sup>st</sup> December 2020) and New Zealand Health and Disability Ethics Committee (21/NTA/83; original submission approved 6<sup>th</sup> September 2021). Recruitment commenced on May 10<sup>th</sup>, 2022.

## Dissemination of Results

Participants will be given the option to receive a summary of results at the completion of the study, in addition to the ongoing feedback provided from the outcomes of the annual screening questionnaires and face-to-face assessments. Additionally, publication in high impact peer-reviewed journals will be sought and presentation at national and international conferences is

1  
2 anticipated. Novel and modern information dissemination strategies will also be used including  
3 social media, podcast presentations and Free Open Access Medical education (FOAM)  
4 resources to generate discussion and disseminate the outcomes of the study.  
5  
6  
7  
8  
9

### 10 11 **Author Statement:**

12 DAL, VA, WB, KG and LJS conceived the study, developed the protocol, co-wrote the first  
13 draft of the manuscript, and approved the final draft. All other authors (LHC, NTS, KRC,  
14 ADM, SB, CFP, KM, NP, PJA, NB, BR, HB, KM, JCF, CS, SR, JB, SE, MSF, BWA, PV, DY,  
15 DA, MMHC, CPB, TLG, AI, IAN, JA) assisted with development of the interventions and  
16 methods, outcomes, and materials, reviewed the manuscript, and approved the final version.  
17  
18  
19  
20  
21  
22  
23  
24  
25  
26  
27

### 28 **Acknowledgements:**

29 We would like to thank the families who have generously participated in the development of  
30 the methods and family materials, and who will participate in the study.  
31  
32  
33  
34  
35  
36

### 37 **Patient and public involvement:**

38 Patients and/or the public were involved in the design, conduct, reporting, and dissemination  
39 plans of this research. Refer to the Methods section for further details.  
40  
41  
42  
43  
44  
45  
46  
47  
48  
49  
50  
51  
52  
53  
54  
55  
56  
57  
58  
59  
60

**REFERENCES**

1. Bronicki RA, Chang AC. Management of the postoperative pediatric cardiac surgical patient. *Crit Care Med.* 2011;39(8):1974-84.
2. Jacobs JP, Mayer JE, Jr., Mavroudis C, O'Brien SM, Austin EH, 3rd, Pasquali SK, et al. The Society of Thoracic Surgeons Congenital Heart Surgery Database: 2016 Update on Outcomes and Quality. *Ann Thorac Surg.* 2016;101(3):850-62.
3. Lynn MM, Salemi JL, Kostelyna SP, Morris SA, Tejtel S, Lopez KN. Lesion-Specific Congenital Heart Disease Mortality Trends in Children: 1999 to 2017. *Pediatrics.* 2022;150(4).
4. Ntiloudi D, Giannakoulas G, Parcharidou D, Panagiotidis T, Gatzoulis MA, Karvounis H. Adult congenital heart disease: A paradigm of epidemiological change. *Int J Cardiol.* 2016;218:269-74.
5. Walker K, Badawi N, Halliday R, Stewart J, Sholler GF, Winlaw DS, et al. Early developmental outcomes following major noncardiac and cardiac surgery in term infants: a population-based study. *J Pediatr.* 2012;161(4):748-52.e1.
6. Loblein HJ, Vukmirovich PW, Donofrio MT, Sanz JH. Prevalence of neurodevelopmental disorders in a clinically referred sample of children with CHD. *Cardiology in the Young.* 2022:1-8.
7. Liamlahi R, Latal B. Neurodevelopmental outcome of children with congenital heart disease. *Handbook of Clinical Neurology.* 2019;162:329-45.
8. Limperopoulos C, Majnemer A, Shevell MI, Rosenblatt B, Rohlicek C, Tchervenkov C. Neurodevelopmental status of newborns and infants with congenital heart defects before and after open heart surgery. *The Journal of pediatrics.* 2000;137(5):638-45.
9. Yi S-H, Kim S-J, Huh J, Jun T-G, Cheon HJ, Kwon J-Y. Dysphagia in infants after open heart procedures. *American journal of physical medicine & rehabilitation.* 2013;92(6):496-503.

10. Fourdain S, St-Denis A, Harvey J, Birca A, Carmant L, Gallagher A, et al. Language development in children with congenital heart disease aged 12–24 months. *European Journal of Paediatric Neurology*. 2019;23(3):491-9.
11. Gaudet I, Paquette N, Bernard C, Doussau A, Harvey J, Beaulieu-Genest L, et al. Neurodevelopmental Outcome of Children with Congenital Heart Disease: A Cohort Study from Infancy to Preschool Age. *The Journal of Pediatrics*. 2021;239:126-35. e5.
12. Lawley CM, Winlaw DS, Sholler GF, Martin A, Badawi N, Walker K, et al. School-Age Developmental and Educational Outcomes Following Cardiac Procedures in the First Year of Life: A Population-Based Record Linkage Study. *Pediatr Cardiol*. 2019;40(3):570-9.
13. Petrou S, Johnson S, Wolke D, Marlow N. The association between neurodevelopmental disability and economic outcomes during mid-childhood. *Child: care, health and development*. 2013;39(3):345-57.
14. Wood NS, Marlow N, Costeloe K, Gibson AT, Wilkinson AR. Neurologic and developmental disability after extremely preterm birth. *New England Journal of Medicine*. 2000;343(6):378-84.
15. Adams-Chapman I, DeMauro SB. Neurodevelopmental outcomes of the preterm infant. *Clinics in perinatology*. 2018;45(3):xvii-xviii.
16. Feldmann M, Bataillard C, Ehrler M, Ullrich C, Knirsch W, Gosteli-Peter MA, et al. Cognitive and executive function in congenital heart disease: a meta-analysis. *Pediatrics*. 2021;148(4).
17. Jackson WM, Davis N, Calderon J, Lee JJ, Feirsen N, Bellinger DC, et al. Executive functions in children with heart disease: a systematic review and meta-analysis. *Cardiology in the Young*. 2021;31(12):1914-22.
18. Marino BS, Lipkin PH, Newburger JW, Peacock G, Gerdes M, Gaynor JW, et al. Neurodevelopmental outcomes in children with congenital heart disease: evaluation and

1  
2 management: a scientific statement from the American Heart Association. *Circulation*.  
3  
4 2012;126(9):1143-72.  
5

6  
7 19. Diamond A. Why improving and assessing executive functions early in life is critical.  
8  
9 In: Griffin J, McCardle P, Freund L, editors. *Executive function in preschool-age children:*  
10  
11 *Integrating measurement, neurodevelopment, and translational research: American*  
12  
13 *Psychological Association; 2016. p. 11-43.*  
14

15  
16 20. Majnemer A, Limperopoulos C, Shevell MI, Rohlicek C, Rosenblatt B, Tchervenkov  
17  
18 C. A new look at outcomes of infants with congenital heart disease. *Pediatric neurology*.  
19  
20 2009;40(3):197-204.  
21

22  
23 21. Sarrechia I, Miatton M, De Wolf D, François K, Gewillig M, Meyns B, et al.  
24  
25 *Neurocognitive development and behaviour in school-aged children after surgery for*  
26  
27 *univentricular or biventricular congenital heart disease. European Journal of Cardio-Thoracic*  
28  
29 *Surgery. 2016;49(1):167-74.*  
30

31  
32 22. Sarrechia I, Miatton M, François K, Gewillig M, Meyns B, Vingerhoets G, et al.  
33  
34 *Neurodevelopmental outcome after surgery for acyanotic congenital heart disease. Research*  
35  
36 *in developmental disabilities. 2015;45:58-68.*  
37

38  
39 23. Hövels-Gürich HH, Seghaye M-C, Schnitker R, Wiesner M, Huber W, Minkenberg  
40  
41 R, et al. Long-term neurodevelopmental outcomes in school-aged children after neonatal  
42  
43 arterial switch operation. *The Journal of Thoracic and Cardiovascular Surgery*.  
44  
45 2002;124(3):448-58.  
46

47  
48 24. Simons JS, Glidden R, Sheslow D, Pizarro C. Intermediate neurodevelopmental  
49  
50 outcome after repair of ventricular septal defect. *The Annals of thoracic surgery*.  
51  
52 2010;90(5):1586-91.  
53

54  
55 25. Hövels-Gürich HH, Konrad K, Skorzinski D, Nacken C, Minkenberg R, Messmer BJ,  
56  
57 et al. Long-term neurodevelopmental outcome and exercise capacity after corrective surgery  
58  
59



1  
2 for tetralogy of Fallot or ventricular septal defect in infancy. *The Annals of thoracic surgery*.  
3  
4 2006;81(3):958-66.

5  
6  
7 26. Bellinger DC, Wypij D, Rappaport LA, Jonas RA, Wernovsky G, Newburger JW.  
8  
9 Neurodevelopmental status at eight years in children with dextro-transposition of the great  
10  
11 arteries: the Boston Circulatory Arrest Trial. *The Journal of thoracic and cardiovascular*  
12  
13 *surgery*. 2003;126(5):1385-96.

14  
15  
16 27. Billotte M, Deken V, Joriot S, Vaksmann G, Richard A, Bouzguenda I, et al.  
17  
18 Screening for neurodevelopmental disorders in children with congenital heart disease.  
19  
20 *European Journal of Pediatrics*. 2021;180(4):1157-67.

21  
22  
23 28. Ilardi D, Sanz JH, Cassidy AR, Sananes R, Rollins CK, Shade CU, et al.  
24  
25 Neurodevelopmental evaluation for school-age children with congenital heart disease:  
26  
27 recommendations from the cardiac neurodevelopmental outcome collaborative. *Cardiology in*  
28  
29 *the Young*. 2020;30(11):1623-36.

30  
31  
32 29. Ryan KR, Jones MB, Allen KY, Marino BS, Casey F, Wernovsky G, et al.  
33  
34 Neurodevelopmental outcomes among children with congenital heart disease: at-risk  
35  
36 populations and modifiable risk factors. *World Journal for Pediatric and Congenital Heart*  
37  
38 *Surgery*. 2019;10(6):750-8.

39  
40  
41 30. Bowe AK, Hourihane J, Staines A, Murray DM. The predictive value of the ages and  
42  
43 stages questionnaire in late infancy for low average cognitive ability at age 5. *Acta*  
44  
45 *Paediatrica*. 2022;111(6):1194-200.

46  
47  
48 31. Sanz JH, Anixt J, Bear L, Basken A, Beca J, Marino BS, et al. Characterisation of  
49  
50 neurodevelopmental and psychological outcomes in CHD: a research agenda and  
51  
52 recommendations from the cardiac neurodevelopmental outcome collaborative. *Cardiology in*  
53  
54 *the Young*. 2021;31(6):876-87.

55  
56  
57 32. Schlapbach LJ, Horton SB, Long DA, Beca J, Erickson S, Festa M, et al. Study  
58  
59 protocol: NITric oxide during cardiopulmonary bypass to improve Recovery in Infants with  
60

1  
2  
3 Congenital heart defects (NITRIC trial): a randomised controlled trial. *BMJ Open*.

4  
5 2019;9(8):e026664.

6  
7 33. Gibbons KS, Schlapbach LJ, Horton SB, Long DA, Beca J, Erickson S, et al.

8  
9 Statistical analysis plan for the NITric oxide during cardiopulmonary bypass to improve  
10  
11 Recovery in Infants with Congenital heart defects (NITRIC) trial. *Critical Care and*  
12  
13 *Resuscitation*. 2021;23(1):47-58.

14  
15  
16 34. Schlapbach LJ, Gibbons KS, Horton SB, Johnson K, Long DA, Buckley DH, et al.

17  
18 Effect of Nitric Oxide via Cardiopulmonary Bypass on Ventilator-Free Days in Young  
19  
20 Children Undergoing Congenital Heart Disease Surgery: The NITRIC Randomized Clinical  
21  
22 Trial. *JAMA*. 2022;328(1):38-47.

23  
24  
25 35. Von Elm E, Altman DG, Egger M, Pocock SJ, Gøtzsche PC, Vandenbroucke JP, et al.

26  
27 The Strengthening the Reporting of Observational Studies in Epidemiology (STROBE)  
28  
29 Statement: guidelines for reporting observational studies. *International journal of surgery*.  
30  
31 2014;12(12):1495-9.

32  
33  
34 36. Australian Bureau of Statistics. Socio-Economic Indexes for Areas 2022 [updated 6

35  
36  
37 May 2022. Available from: <https://www.abs.gov.au/websitedbs/censushome.nsf/home/seifa>.

38  
39  
40 37. Atkinson J, Salmond C, Crampton P. NZDep2013 index of deprivation. Wellington:

41  
42 Department of Public Health, University of Otago. 2014.

43  
44  
45 38. Australian Bureau of Statistics. Remoteness Structure 2016 [Available from:

46  
47 <https://www.abs.gov.au/statistics/statistical-geography/remoteness-structure>.

48  
49  
50 39. Statistics NewZealand. New Zealand: an urban/rural profile. Wellington Statistics

51  
52 New Zealand. 2004.

53  
54  
55 40. Ware J, Butcher JL, Latal B, Sadhwani A, Rollins CK, Soto CLB, et al.

56  
57 Neurodevelopmental evaluation strategies for children with congenital heart disease aged  
58  
59 birth through 5 years: recommendations from the cardiac neurodevelopmental outcome  
60  
collaborative. *Cardiology in the Young*. 2020;30(11):1609-22.

- 1  
2  
3 41. Spector LG, Menk JS, Knight JH, McCracken C, Thomas AS, Vinocur JM, et al.  
4  
5 Trends in long-term mortality after congenital heart surgery. *Journal of the American College*  
6  
7 *of Cardiology*. 2018;71(21):2434-46.  
8  
9 42. Als LC, Tennant A, Nadel S, Cooper M, Pierce CM, Garralda ME. Persistence of  
10  
11 neuropsychological deficits following pediatric critical illness. *Critical Care Medicine*.  
12  
13 2015;43(8):e312-e5.  
14  
15 43. Verstraete S, Verbruggen SC, Hordijk JA, Vanhorebeek I, Dulfer K, Güiza F, et al.  
16  
17 Long-term developmental effects of withholding parenteral nutrition for 1 week in the  
18  
19 paediatric intensive care unit: a 2-year follow-up of the PEPaNIC international, randomised,  
20  
21 controlled trial. *The Lancet Respiratory Medicine*. 2019;7(2):141-53.  
22  
23 44. Abshire M, Dinglas VD, Cajita MIA, Eakin MN, Needham DM, Himmelfarb CD.  
24  
25 Participant retention practices in longitudinal clinical research studies with high retention  
26  
27 rates. *BMC medical research methodology*. 2017;17(1):1-10.  
28  
29 45. Robinson KA, Dennison CR, Wayman DM, Pronovost PJ, Needham DM. Systematic  
30  
31 review identifies number of strategies important for retaining study participants. *Journal of*  
32  
33 *clinical epidemiology*. 2007;60(8):757. e1-. e19.  
34  
35 46. Robinson KA, Dinglas VD, Sukrithan V, Yalamanchilli R, Mendez-Tellez PA,  
36  
37 Dennison-Himmelfarb C, et al. Updated systematic review identifies substantial number of  
38  
39 retention strategies: using more strategies retains more study participants. *Journal of clinical*  
40  
41 *epidemiology*. 2015;68(12):1481-7.  
42  
43 47. Tansey CM, Matté AL, Needham D, Herridge MS. Review of retention strategies in  
44  
45 longitudinal studies and application to follow-up of ICU survivors. *Intensive care medicine*.  
46  
47 2007;33(12):2051-7.  
48  
49 48. Needham D. Improving Long-Term Outcomes Research for Acute Respiratory  
50  
51 Failure 2023 [Available from: <https://www.improvelto.com/>.  
52  
53  
54  
55  
56  
57  
58  
59  
60

- 1  
2  
3 49. Long D, Gibbons K, Dow B, Best J, Webb K-L, Liley HG, et al. Effectiveness–  
4 implementation hybrid-2 randomised trial of a collaborative Shared Care Model for Detecting  
5 Neurodevelopmental Impairments after Critical Illness in Young Children (DAISY): pilot  
6 study protocol. *BMJ open*. 2022;12(7):e060714.  
7  
8  
9  
10  
11 50. Schlapbach LJ, Gibbons K, Ridolfi R, Harley A, Cree M, Long D, et al. Resuscitation  
12 in Paediatric Sepsis Using Metabolic Resuscitation–A Randomized Controlled Pilot Study in  
13 the Paediatric Intensive Care Unit (RESPOND PICU): Study Protocol and Analysis Plan.  
14 *Frontiers in pediatrics*. 2021;9:663435.  
15  
16  
17  
18  
19  
20  
21 51. Raman S, Brown G, Long D, Gelbart B, Delzoppo C, Millar J, et al. Priorities for  
22 paediatric critical care research: a modified Delphi study by the Australian and New Zealand  
23 Intensive Care Society Paediatric Study Group. *Critical Care and Resuscitation*.  
24 2021;23(2):194-201.  
25  
26  
27  
28  
29  
30 52. Fink EL, Maddux AB, Pinto N, Sorenson S, Notterman D, Dean JM, et al. A core  
31 outcome set for pediatric critical care. *Critical care medicine*. 2020;48(12):1819-28.  
32  
33  
34  
35  
36  
37  
38  
39  
40  
41  
42  
43  
44  
45  
46  
47  
48  
49  
50  
51  
52  
53  
54  
55  
56  
57  
58  
59  
60

**Supplemental materials for:****A Longitudinal Cohort Study Investigating Neurodevelopmental and Socio-emotional Outcomes in School-Entry aged Children after Open Heart Surgery in Australia and New Zealand: The NITRIC Follow-up Study Protocol**

Debbie Long<sup>1,2</sup>, Vicki A Anderson<sup>3,4</sup>, Louise H Crossley<sup>3</sup>, Nikita Tuli Sood<sup>3</sup>, Karina R Charles<sup>1,2</sup>, Anna D MacDonald<sup>5</sup>, Samudragupta Bora<sup>6,7</sup>, Carmela F Pestell<sup>8</sup>, Kathryn Murrell<sup>9</sup>, Natalie Pride<sup>10</sup>, Peter J Anderson<sup>11</sup>, Nadia Badawi<sup>12</sup>, Brian Rose<sup>13,14</sup>, Heidi Baillie<sup>15</sup>, Kate Masterson<sup>3,16</sup>, Jenipher Chumbes Flores<sup>17</sup>, Claire Sherring<sup>18</sup>, Sainath Raman<sup>2,5</sup>, John Beca<sup>18</sup>, Simon Erickson<sup>17</sup>, Marino S Festa<sup>15</sup>, Benjamin W Anderson<sup>19,20</sup>, Prem Venugopal<sup>20,21</sup>, Deane Yim<sup>22</sup>, David Andrew<sup>23</sup>, Michael M H Cheung<sup>24,25</sup>, Christian P Brizard<sup>25,26</sup>, Thomas L Gentles<sup>27,28</sup>, Ajay Iyengar<sup>28,29</sup>, Ian A Nicholson<sup>30</sup>, Julian Ayer<sup>30</sup>, Warwick Butt<sup>3,16</sup>, Luregn J Schlapbach<sup>5,31</sup>, Kristen S Gibbons<sup>5</sup>, and The NITRIC Follow-up Study Group, and The Australian and New Zealand Intensive Care Society (ANZICS) Paediatric Study Group (PSG)

<sup>1</sup> School of Nursing, Centre for Healthcare Transformation, Queensland University of Technology, Kelvin Grove, QLD, Australia

<sup>2</sup> Paediatric Intensive Care Unit, Queensland Children's Hospital, South Brisbane, QLD Australia

<sup>3</sup> Clinical Sciences, Murdoch Children's Research Institute, Parkville, VIC, Australia

<sup>4</sup> Psychology Service, Royal Children's Hospital Melbourne, Parkville, VIC, Australia

<sup>5</sup> Child Health Research Centre, The University of Queensland, Brisbane, QLD, Australia

<sup>6</sup> Department of Pediatrics, University Hospitals Rainbow Babies & Children's Hospital, Case Western Reserve University School of Medicine, Cleveland, OH, United States

<sup>7</sup> Mater Research Institute, Faculty of Medicine, The University of Queensland, Brisbane, QLD, Australia

<sup>8</sup> School of Psychological Science, University of Western Australia, Crawley, WA, Australia

<sup>9</sup> Starship Children's Hospital, Auckland, New Zealand

<sup>10</sup> Kids Neuroscience Centre, The Children's Hospital at Westmead, Westmead, NSW, Australia

<sup>11</sup> Turner Institute for Brain and Mental Health, School of Psychological Sciences, Monash University, Clayton, VIC, Australia

<sup>12</sup> Grace Centre for Newborn Care, The Children's Hospital at Westmead, Westmead, NSW, Australia

<sup>13</sup> Consumer Representative, Child Health Research Centre, The University of Queensland, South Brisbane, QLD, Australia

<sup>14</sup> Australian and New Zealand Fontan Advocacy Committee, HeartKids Ltd, Sydney, NSW, Australia

<sup>15</sup> Paediatric Intensive Care Unit, The Children's Hospital at Westmead, Westmead, NSW, Australia

<sup>16</sup> Paediatric Intensive Care Unit, Royal Children's Hospital, Parkville, VIC, Australia

<sup>17</sup> Paediatric Intensive Care Unit, Perth Children's Hospital, Nedlands, WA, Australia

<sup>18</sup> Paediatric Intensive Care Unit, Starship Children's Hospital, Auckland, New Zealand

<sup>19</sup> Queensland Paediatric Cardiac Service, Children's Health Queensland Hospital and Health Service, South Brisbane, QLD, Australia

<sup>20</sup> School of Medicine, The University of Queensland, South Brisbane, QLD, Australia

<sup>21</sup> Department for Cardiac Surgery, Queensland Children's Hospital, Brisbane, QLD, Australia

<sup>22</sup> Department of Paediatric Cardiology, Perth Children's Hospital, Nedlands, WA, Australia

<sup>23</sup> Department of Cardiothoracic Surgery, Perth Children's Hospital, Nedlands, WA, Australia

- 1  
2  
3 <sup>24</sup> Department of Cardiology, Royal Children's Hospital, Parkville, VIC, Australia  
4 <sup>25</sup> Murdoch Children's Research Institute, Parkville, VIC, Australia  
5 <sup>26</sup> Department of Cardiac Surgery, Royal Children's Hospital, Parkville, VIC, Australia  
6 <sup>27</sup> Paediatric and Congenital Cardiac Service, Starship Children's Hospital, Auckland, New Zealand  
7 <sup>28</sup> Paediatrics, Child and Youth Health, University of Auckland, Auckland, New Zealand  
8 <sup>29</sup> Department of Surgery, University of Auckland, Auckland, New Zealand  
9 <sup>30</sup> Heart Centre for Children, The Children's Hospital at Westmead, Westmead, NSW, Australia  
10 <sup>31</sup> Department of Intensive Care and Neonatology, Children's Research Centre, University Children's Hospital Zurich, Zurich, Switzerland  
11  
12

### **The NITRIC Follow-up Study Group**

13  
14 Kristen S Gibbons, Luregn J Schlapbach, Samudragupta Bora, Devika Ganesamoorthy, Anna D MacDonald, Antje Blumenthal, Trang M T Pham, Endrias  
15 Ergetu, The University of Queensland, Brisbane, Australia; Debbie Long, Queensland University of Technology, Brisbane, Australia; Sainath Raman, Karina  
16 R Charles, Prem Venugopal, Benjamin W Anderson, Queensland Children's Hospital, Brisbane, Australia; Warwick Butt, Vicki A Anderson, Kate Masterson,  
17 Jenni Braeutigam, Michael M H Cheung, Christian P Brizard, Royal Children's Hospital, Melbourne, Australia; Peter J Anderson, Monash University,  
18 Melbourne, Australia; Lachlan Coin, University of Melbourne, Melbourne, Australia; Simon Erickson, Carmela F Pestell, Jenipher Chumbes Flores, Deane  
19 Yim, David Andrews, Perth Children's Hospital, Perth, Australia; Marino S Festa, Nadia Badawi, Natalie Pride, Heidi Baillie, Jennifer Darvas, Ian A  
20 Nicholson, Julian Ayer, The Children's Hospital at Westmead, Sydney, Australia; John Beca, Kathryn Murrell, Laura Brown, Claire Sherring, Shelley Coetzer,  
21 Thomas L Gentles, Ajay Iyengar, Starship Children's Hospital, Auckland, New Zealand; and Brian Rose, Holly Williams, Consumer Representatives.  
22

### **The ANZICS PSG**

23  
24 Breanna Pellegrini, Australian and New Zealand Paediatric Intensive Care Registry; Shane George, Gold Coast University Hospital, Gold Coast, Australia;  
25 Corrine Balit, John Hunter Hospital, Newcastle, Australia; Felix Oberender, Monash Children's Hospital, Melbourne, Australia; Simon Erickson, Jenipher  
26 Chumbes Flores, Perth Children's Hospital, Perth, Australia; Karina Charles, Sainath Raman, Michaela Waak, Queensland Children's Hospital, Brisbane,  
27 Australia; Debbie Long, Queensland University of Technology, Brisbane, Australia; Warwick Butt (Chair), Carmel Delzoppo, Ben Gelbart, Kate Masterson,  
28 Johnny Millar, Royal Children's Hospital, Melbourne, Australia; Anusha Ganeshalingam, Claire Sherring, Starship Children's Hospital, Auckland, New  
29 Zealand; Puneet Singh, Vicky Smith, Sydney Children's Hospital, Randwick, Australia; Kristen Gibbons, Luregn Schlapbach (Past Chair), Jessica Schults,  
30 The University of Queensland, Brisbane, Australia; and Jennifer Darvas, Marino Festa, The Children's Hospital at Westmead, Sydney, Australia.  
31  
32

### **Corresponding Author:**

33 A/Prof Kristen Gibbons, PhD  
34 Child Health Research Centre, The University of Queensland  
35 62 Graham St, South Brisbane, Queensland, 4101, Australia  
36 Email: [k.gibbons@uq.edu.au](mailto:k.gibbons@uq.edu.au); Phone: +61 407 966 708  
37  
38  
39  
40  
41  
42  
43  
44  
45  
46

**Table of Contents:**

Table S1. Parent-completed online screening assessments conducted at 2- to 5-years of age

Table S2. Face-to-face neurodevelopmental assessment at 5-years of age

References.

For peer review only

Table S1. Parent-completed online screening assessments conducted at 2- to 5-years of age

| Construct                                 | Instrument <sup>#^</sup>                                           | Number of Items    | Scoring and Interpretation                                                                                                                                                                                                                                                                                                                                                | Comments                                                                                                                                                                                             |
|-------------------------------------------|--------------------------------------------------------------------|--------------------|---------------------------------------------------------------------------------------------------------------------------------------------------------------------------------------------------------------------------------------------------------------------------------------------------------------------------------------------------------------------------|------------------------------------------------------------------------------------------------------------------------------------------------------------------------------------------------------|
| <b>Child-focused Measures<sup>§</sup></b> |                                                                    |                    |                                                                                                                                                                                                                                                                                                                                                                           |                                                                                                                                                                                                      |
| Neurodevelopment                          | Ages and Stages Questionnaire, 3 <sup>rd</sup> Edition (ASQ-3) (1) | 30                 | Each item scored: Yes, Sometimes, or Not yet. Above, close to, and below cut-off scores provided based on aged norms for each domain. Domain scores added to create total score. Higher scores indicate better neurodevelopment. <i>Main outcome definition: Total ASQ-3 Score (continuous)</i>                                                                           | 5-10 mins to complete. 21 age-appropriate questionnaires for 1-66 months. Domains: communication, gross motor, fine motor, problem-solving and personal-social.                                      |
| Socioemotional Behavior                   | Strengths and Difficulties Questionnaire (SDQ) (2)                 | 25                 | Each item scored on a 3-point Likert scale: Not true, somewhat true, certainly true. Scale scores derived for Emotional problems, Conduct problems, Hyperactivity, Peer problems, Prosocial, and Total Difficulties, compared to aged norms. Higher scores indicate better socioemotional behavior. <i>Main outcome definition: Total Difficulties Score (continuous)</i> | 5-10 mins to complete. Two age-appropriate questionnaires for 2-17 years. Domains: emotional symptoms, conduct problems, hyperactivity/inattention, peer relationship problems, prosocial behaviors. |
| Health Related Quality of Life (HRQoL)    | Pediatric Quality of Life Inventory (PedsQL) (3, 4)                | 23-38 <sup>a</sup> | Each item scored on a 5-point Likert scale: 0 = Never a problem to 4 = Almost always a problem. Psychosocial Health Summary Score, Physical Health Summary Score, and Total Score, compared to aged norms. Higher scores indicate better HRQoL. <i>Main outcome definition: Total PedsQL Score (continuous)</i>                                                           | 5 mins to complete. Five age-appropriate questionnaires for 1 month – 18 years. Domains: physical, emotional, social, and school functioning.                                                        |



| Construct                      | Instrument <sup>#^</sup>                                                            | Number of Items | Scoring and Interpretation                                                                                                                                                                                                                                                                                                                                     | Comments                                                                                                                                                                        |
|--------------------------------|-------------------------------------------------------------------------------------|-----------------|----------------------------------------------------------------------------------------------------------------------------------------------------------------------------------------------------------------------------------------------------------------------------------------------------------------------------------------------------------------|---------------------------------------------------------------------------------------------------------------------------------------------------------------------------------|
| Executive Functioning          | Behavior Rating Inventory for Executive Function for Pre-schoolers (BRIEF-P) (5)    | 63              | Each item scored. Inhibitory Self-Control Index, Flexibility Index, Emergent Metacognition and Global Executive Composite score, compared to aged norms. The recommended cut-off for clinical significance is $\geq 65$ . Lower scores indicate better executive functioning.<br><i>Main outcome definition: Global Executive Composite Score (continuous)</i> | 10-15 mins to complete. One questionnaire 2 - 5 years 11 months. Domains: inhibit, shift, emotional control, working memory, plan/organize.                                     |
| Fatigue                        | The Pediatric Quality of Life Inventory (PedsQL) Multidimensional Fatigue Scale (6) | 6               | Each item scored on 5-point Likert scale: 0 = Never a problem to 4 = Almost always a problem. Total score compared to aged norms. Higher scores indicate lower problems.<br><i>Main outcome definition: Total General Fatigue Score (continuous)</i>                                                                                                           | General Fatigue subscale only 2 minutes to complete. Four age-appropriate questionnaires for 2 – 18 years. Domains: General fatigue, Sleep/rest fatigue, and Cognitive fatigue. |
| Healthcare Utilisation         | Developed by research team.                                                         | 12              | <i>Main outcome definition: Total parent-reported utilisation of in- and out-patient visits and costs (continuous)</i>                                                                                                                                                                                                                                         | 2 minutes to complete. Domains: Visits to healthcare professionals and facilities, and finances relating to appointments and care                                               |
| <b>Parent-focused Measures</b> |                                                                                     |                 |                                                                                                                                                                                                                                                                                                                                                                |                                                                                                                                                                                 |
| Emotional Wellbeing            | The Kessler-6 (K6) (7)                                                              | 6               | Items are scored on a 5-point Likert scale (1= 'none of the time' to 5 = 'all of the time'). Total score ranged from 0-24, with higher scores representing higher levels of psychological distress such as anxiety and depression.<br><i>Main outcome definition: Total K6 Score (continuous)</i>                                                              | 1 minute to complete                                                                                                                                                            |

| Construct        | Instrument <sup>#^</sup>                              | Number of Items | Scoring and Interpretation                                                                                                                                                                                                                                                                                              | Comments                                                                                                           |
|------------------|-------------------------------------------------------|-----------------|-------------------------------------------------------------------------------------------------------------------------------------------------------------------------------------------------------------------------------------------------------------------------------------------------------------------------|--------------------------------------------------------------------------------------------------------------------|
| Parenting Stress | The Parenting Stress Index-4 Short Form (PSI-4-SF)(8) | 36              | Items are scored on a 4-point Likert scale: 1 = Strongly agree to 5 = strongly disagree. A percentile score on Total stress $\geq$ 91% indicates clinically significant levels of stress. Higher scores indicate more parenting stress.<br><i>Main outcome definition: Total PIS-4-SF Percentile Score (continuous)</i> | 10 minutes to complete.<br>Domains: Parental distress, Parent-child dysfunctional interaction, and Difficult child |

<sup>#</sup>All measures used in accordance with associated user manuals; <sup>^</sup>Order of administration of questionnaires standardized; <sup>§</sup> All child-focused measures validated for use as parent-reported; <sup>a</sup> Depending on age.

For peer review only

**Table S2. Face-to-face neurodevelopmental assessment at 5-years of age**

| Construct                    | Instrument <sup>#^</sup>                                                                                                                        | Number of Items | Scoring and Interpretation                                                                                                                                                                                                                                                 | Comments                                                                                                                                                            |
|------------------------------|-------------------------------------------------------------------------------------------------------------------------------------------------|-----------------|----------------------------------------------------------------------------------------------------------------------------------------------------------------------------------------------------------------------------------------------------------------------------|---------------------------------------------------------------------------------------------------------------------------------------------------------------------|
| <b>Face-to-Face Measures</b> |                                                                                                                                                 |                 |                                                                                                                                                                                                                                                                            |                                                                                                                                                                     |
| Cognition                    | Wechsler Preschool & Primary Scale of Intelligence – 4 <sup>th</sup> Edition Australia and New Zealand Standardised Edition (WPPSI-IV A&NZ) (9) | 15 subtests     | Three levels of interpretation: Full Scale, Primary Index scales, and Ancillary Index scales. The Full Scale and all indexes have a mean score of 100 and SD of 15. Higher scores indicate higher cognition.<br><i>Main outcome definition: Full Scale IQ (continuous)</i> | Block design, Information, Matrix reasoning, Bug search, Picture memory, Similarities, Cancellation and Zoo location subtests only. Administration time: 45-60 mins |
| Motor function               | Movement Assessment Battery for Children, 2 <sup>nd</sup> Edition (MABC-2) (10)                                                                 | 8 tasks         | 8 Task standard scores and a Total test score. Manual dexterity component score: sum of standard scores of MD1, MD2 and MD3. Higher scores indicate better motor function.<br><i>Main outcome definition: Manual Dexterity Component Score (continuous)</i>                | Posting coins, Threading beads and Drawing trail 1 subtests only. Administration time: 10 mins                                                                      |
| Executive Function           | Day/Night Task (11)                                                                                                                             | 16 cards        | Total correct, Total Self Corrections, Total Time, Efficiency Score (Total Correct/Total Time to Complete). Higher scores indicate better executive function.<br><i>Main outcome definition: Efficiency Score (continuous)</i>                                             | Administration time: 5 mins                                                                                                                                         |

| Construct          | Instrument <sup>#^</sup>                                                                                                                           | Number of Items  | Scoring and Interpretation                                                                                                                                                                                                                                                         | Comments                                                                                                                     |
|--------------------|----------------------------------------------------------------------------------------------------------------------------------------------------|------------------|------------------------------------------------------------------------------------------------------------------------------------------------------------------------------------------------------------------------------------------------------------------------------------|------------------------------------------------------------------------------------------------------------------------------|
| Attention - Visual | Test of Everyday Attention for Children, 2 <sup>nd</sup> Edition (TEA-Ch2) (12)                                                                    | 5 trials         | Scaled scores have a mean of 10 and SD of 3 (Range 1-19). Percentile ranked score. Higher scores indicate better attention.<br><i>Main outcome definition: Attention Score (continuous)</i>                                                                                        | Balloon Hunt and Balloons 5 subtests only.<br>Administration time: 7 mins                                                    |
| Language           | Clinical Evaluation of Language Fundamentals – Australian and New Zealand 5 <sup>th</sup> Edition Screening Test (CELF-5 A&NZ Screening Test) (13) | 13               | Total Score: sum of the child's score points. Total score compared to a research-based criterion score appropriate for the child's age. Age 5:0-8:11 have one criterion score. Higher scores indicate better language.<br><i>Main outcome definition: Total Score (continuous)</i> | Word structure, Word Classes, Following directions and Recalling sentences subtests only.<br>Administration time: 10-15 mins |
| Attention          | Conners Kiddie Continuous Performance Test, 2 <sup>nd</sup> Edition (K-CPT 2) (14)                                                                 | Up to 200 trials | Higher scores indicate poorer attention.<br><i>Main outcome definition: Composite Attention Score</i>                                                                                                                                                                              | 4 domains of attention: Impulsivity, Inattentiveness, Sustained attention, and Vigilance.<br>Administration time: 7 mins     |

| Construct                               | Instrument <sup>#^</sup>                                                            | Number of Items           | Scoring and Interpretation                                                                                                                                                                                                                                                                                                                                                             | Comments                                                   |
|-----------------------------------------|-------------------------------------------------------------------------------------|---------------------------|----------------------------------------------------------------------------------------------------------------------------------------------------------------------------------------------------------------------------------------------------------------------------------------------------------------------------------------------------------------------------------------|------------------------------------------------------------|
| Memory                                  | Wide Range Assessment of Memory and Learning, 3 <sup>rd</sup> Edition (WRAML3) (15) | 4 stories<br>85 questions | Scaled score, M=10, SD=3. Subtest scaled scores derived from the total raw scores on a given subtest- and describe the overall performance on that subtest.<br>Story Memory – story memory total raw score.<br>Story Recognition – story memory recognition total raw score. Higher scores indicate better memory.<br><i>Main outcome definition: Verbal Memory Score (continuous)</i> | Story Memory subtest only.<br>Administration time: 20 mins |
| Memory                                  | Working Memory Test Battery for Children (WMTB-C) (16)                              | 9                         | Trials Correct Score: Total number of correct trials achieved before testing is discontinued. Higher scores indicate better memory.<br><i>Main outcome definition: Total Trials Correct (continuous)</i>                                                                                                                                                                               | Digit Recall subtest only.<br>Administration time: 5 mins  |
| <b>Parent-completed Online Measures</b> |                                                                                     |                           |                                                                                                                                                                                                                                                                                                                                                                                        |                                                            |
| Social behavior/Autism                  | Social Responsiveness Scale, 2 <sup>nd</sup> Edition (SRS-2) (17)                   | 65                        | Each item scored on a 4-point Likert scale: 1 = Not true to 4 = Almost always true.<br>Scores: Total, Treatment subscales, DSM-5 compatible subscales. Higher scores indicate clinically significant deficiencies in social behavior<br><i>Main outcome definition: Total Score (continuous)</i>                                                                                       | Administration time: 15-20 mins                            |

| Construct          | Instrument <sup>#^</sup>                                                   | Number of Items | Scoring and Interpretation                                                                                                                                                                                                                                                                                                                                                                                                                                                                                                                  | Comments                                                                                                                          |
|--------------------|----------------------------------------------------------------------------|-----------------|---------------------------------------------------------------------------------------------------------------------------------------------------------------------------------------------------------------------------------------------------------------------------------------------------------------------------------------------------------------------------------------------------------------------------------------------------------------------------------------------------------------------------------------------|-----------------------------------------------------------------------------------------------------------------------------------|
| ADHD               | ADHD Rating Scale, 5 <sup>th</sup> Edition (ADHD-RS-5) (18)                | 18              | <p>Each item scored on a 4-point Likert scale.</p> <p>Scores: Total, Inattention and Hyperactivity-Impulsivity.</p> <p>Total raw score: Sum of inattention and hyperactivity subscale raw scores. Converted to total percentile score. Higher scores indicate more impairment in attention.</p> <p><i>Main outcome definition: Total Percentile Score (continuous)</i></p>                                                                                                                                                                  | Administration time: 5 mins                                                                                                       |
| Social functioning | Adaptive Behavior Assessment System, 3 <sup>rd</sup> Edition (ABAS-3) (19) | 46              | <p>Each item is scored on a 4-point Likert scale: 0 = Is not able to do this behavior to 3 = Always (or almost always)</p> <p>Standard Score for Social Adaptive domain compared to norms. Mean of 100 and SD of 15. Lower scores indicate lower adaptive behaviors. General Adaptive Composite Score: Composed on all measured skill areas, providing an overall estimate of adaptive behavior. Higher scores indicate better social functioning.</p> <p><i>Main outcome definition: General Adaptive Composite Score (continuous)</i></p> | <p>Leisure and Social subscales only</p> <p>Administration time: 10 mins</p> <p>One age-appropriate questionnaire 5-21 years.</p> |

| Construct               | Instrument <sup>#^</sup>                                                                     | Number of Items | Scoring and Interpretation                                                                                                                                                                                                                                                                                                                           | Comments                                                                                                                                                 |
|-------------------------|----------------------------------------------------------------------------------------------|-----------------|------------------------------------------------------------------------------------------------------------------------------------------------------------------------------------------------------------------------------------------------------------------------------------------------------------------------------------------------------|----------------------------------------------------------------------------------------------------------------------------------------------------------|
| Fatigue                 | Pediatric Quality of Life Inventory (PedsQL) Multidimensional Fatigue Scale – Full scale (6) | 18              | Each item scored on 5-point Likert scale: 0 = Never a problem to 4 = Almost always a problem.<br>Total score: Sum of general, sleep/rest and cognitive fatigue. Higher scores indicate lower problems.<br><i>Main outcome definition: Total Fatigue Score (continuous)</i>                                                                           | Administration time: 5 mins<br>Four age-appropriate questionnaires 2 – 18 years.<br>Domains: General fatigue, Sleep/rest fatigue, and Cognitive fatigue. |
| Parent-Child Attachment | Attachment Relationship Inventory-Caregiver Perspective (ARI-CP 2-5) (20)                    | 48              | Each item scored on a 6-point Likert scale: 1 = Not at all applicable to 5 = Fully applicable.<br>Four subscales (secure, avoidant, ambivalent, disorganized).<br>Scale scores represent the sum scores of all items of the scale. Higher scores indicate better attachment.<br><i>Main outcome definition: Global Attachment Score (continuous)</i> | Administration time: 5 mins                                                                                                                              |

<sup>#</sup>All measures used in accordance with associated user manuals; <sup>^</sup>Order of administration of questionnaires standardized; <sup>a</sup> Depending on age.

## References

1. Squires J, Potter L, Bricker D. The ASQ user's guide for the Ages & Stages Questionnaires: A parent-completed, child-monitoring system. Baltimore, MD, US: Paul H Brookes Publishing; 1995. xvi, 156-xvi, p.
2. Goodman R. The Strengths and Difficulties Questionnaire: a research note. *J Child Psychol Psychiatry*. 1997;38(5):581-6.
3. Varni JW, Burwinkle TM, Seid M, Skarr D. The PedsQL 4.0 as a pediatric population health measure: feasibility, reliability, and validity. *Ambul Pediatr*. 2003;3(6):329-41.
4. Varni JW, Seid M, Kurtin PS. PedsQL 4.0: reliability and validity of the Pediatric Quality of Life Inventory version 4.0 generic core scales in healthy and patient populations. *Med Care*. 2001;39(8):800-12.
5. Gioia G, K. E, Isquith P. Behavior Rating Inventory of Executive Function Preschool Version (BRIEF-P). Odessa, Florida: Psychological Assessment Resources; 2002.
6. Varni JW, Burwinkle TM, Katz ER, Meeske K, Dickinson P. The PedsQL in pediatric cancer: reliability and validity of the Pediatric Quality of Life Inventory Generic Core Scales, Multidimensional Fatigue Scale, and Cancer Module. *Cancer*. 2002;94(7):2090-106.
7. Kessler RC, Andrews G, Colpe LJ, Hiripi E, Mroczek DK, Normand SL, et al. Short screening scales to monitor population prevalences and trends in non-specific psychological distress. *Psychol Med*. 2002;32(6):959-76.
8. Haskett ME, Ahern LS, Ward CS, Allaire JC. Factor structure and validity of the parenting stress index-short form. *J Clin Child Adolesc Psychol*. 2006;35(2):302-12.
9. Wechsler D. Wechsler Preschool and Primary Scale of Intelligence – Fourth Edition. San Antonio, Texas: The Psychological Corporation; 2012.
10. Henderson S, Sugden D, Barnett A. Movement Assessment Battery for Children-2. London: Pearson Assessment; 2007.
11. Gerstadt CL, Hong YJ, Diamond A. The relationship between cognition and action: performance of children 3 1/2-7 years old on a Stroop-like day-night test. *Cognition*. 1994;53(2):129-53.
12. Manly T, Anderson V, Crawford J, George M, Underbjerg M, Robertson IH. Test of Everyday Attention for Children, Second Edition (TEA–Ch2). London: Harcourt Assessment; 2016.
13. Wiig EH, Secord WA, Semel E. Clinical evaluation of language fundamentals: CELF-5. *Journal of Psychoeducational Assessment*. 2013a;33(5):495-500.
14. Conners KC. Conners K-CPT 2. Toronto, Canada: Multi-Health Systems; 2015.
15. Sheslow D, Adams W. Wide Range Assessment of Memory and Learning, 2nd Edition (WRAML2). Pearson 2003.
16. Gathercole S, Pickering S. Working Memory Test Battery for Children (WMTB-C). United Kingdom: Pearson Clinical; 2001.
17. Constantino J, Gruber C. Social Responsiveness Scale - Second Edition (SRS-2). Torrance, California: Western Psychological Services; 2012.
18. DuPaul GJ. Parent and teacher ratings of ADHD symptoms: Psychometric properties in a community-based sample. *Journal of Clinical Child Psychology*. 1991;20:245-53.
19. Harrison P, Oakland T. Adaptive Behavior Assessment System - Third Edition (ABAS-3). Sydney: PsychCorp; 2015.
20. Spruit A, Colonnese C, Wissink I, Uittenbogaard R, Willems L, Stams GJ, et al. Development and validation of the Attachment Relationship Inventory—Caregiver Perception 2–5 years (ARI-CP 2–5): Psychometric structure, external validity, and norms. *Infant mental health journal*. 2021;42(2):188-205.



## Standard Protocol Items for Observational Studies (SPIROS)

**Table 1:** Checklist of preliminary items

| Section and topic                   | Description / sub-categories                                                 | Addressed on page number    |
|-------------------------------------|------------------------------------------------------------------------------|-----------------------------|
| <b>i) General Information</b>       |                                                                              |                             |
| Title                               | Descriptive title identifying study design                                   | Page 1                      |
| Protocol version                    | Version or amendment number and date and summary of changes                  | NA                          |
| Protocol summary                    | Brief summary of protocol research                                           | Pages 6-8                   |
| Sponsor and partner institute name  | Name of sponsor and participating institutes (if applicable)                 | Page 12                     |
| Investigators name                  | Name of principal and co investigators.                                      | Pages 1-4                   |
| Affiliation of investigators        | Affiliated institutions of investigators                                     | Pages 1-4                   |
| Principal researcher contact detail | Name, email address, affiliation of Principal researcher for correspondence. | Corresponding author page 4 |
| Table of content                    | Table of content                                                             | NA                          |
| Page number                         | Page number on each page of protocol                                         | Pages 1-49                  |
| List of Abbreviations               | A detailed List of all abbreviations used in protocol with full form.        | NA                          |
| <b>ii) Introduction</b>             |                                                                              |                             |
| Background of study                 | Scientific background of study                                               | Pages 9-11                  |
| Review of prior research            | Summary of all previous relevant research                                    | Pages 9-11                  |

|                         |                                                                                                                                                                                                                                                                               |                                 |
|-------------------------|-------------------------------------------------------------------------------------------------------------------------------------------------------------------------------------------------------------------------------------------------------------------------------|---------------------------------|
| Rationale of study      | Justification for conducting the study                                                                                                                                                                                                                                        | Page 11                         |
| Aim                     | Broader aims and specific objectives of the study                                                                                                                                                                                                                             | Pages 12                        |
| Objective of study      | Primary and secondary objectives of study                                                                                                                                                                                                                                     | Page 12                         |
| Prespecified hypothesis | Prespecified null or alternative hypothesis                                                                                                                                                                                                                                   | NA                              |
| <b>iii) Methods</b>     |                                                                                                                                                                                                                                                                               |                                 |
| Study design            | Description of type/design of study                                                                                                                                                                                                                                           | Page 12                         |
| Study setting           | Description of setting, locations, relevant dates, including periods of recruitment/survey, exposure, follow-up, and data collection.                                                                                                                                         | Pages 13                        |
|                         | Schedule of study procedure – Figure or table                                                                                                                                                                                                                                 | Tables 1-2                      |
| Sample size             | Estimated number, calculation and assumptions                                                                                                                                                                                                                                 | Page 35                         |
|                         | Power calculation                                                                                                                                                                                                                                                             | NA                              |
| Sampling procedure      | Description of sampling strategy to ensure representativeness and control of potential bias                                                                                                                                                                                   | Page 13                         |
| Participants            | <b>Cohort study</b> —eligibility criteria, and the sources and methods of selection of participants. Describe methods of follow-up.<br>For matched studies, give matching criteria and number of exposed and unexposed                                                        | Pages 13-15<br>Tables 1-2<br>NA |
|                         | <b>Case-control study</b> —Give the eligibility criteria, and the sources and methods of case ascertainment and control selection. Give the rationale for the choice of cases and controls<br>For matched studies, give matching criteria and the number of controls per case |                                 |

|                              |                                                                                                                                                                                                                                                                                                                           |                                                |
|------------------------------|---------------------------------------------------------------------------------------------------------------------------------------------------------------------------------------------------------------------------------------------------------------------------------------------------------------------------|------------------------------------------------|
|                              | <b>Cross-sectional study</b> —Give the eligibility criteria, and the sources and methods of selection of participants                                                                                                                                                                                                     |                                                |
| Variables                    | <ul style="list-style-type: none"> <li>• All outcomes</li> <li>• Exposures- definition of exposure of interest,</li> <li>• Predictors</li> <li>• Potential confounders</li> <li>• Effect modifiers</li> </ul>                                                                                                             | Page 15<br>Tables 1-2                          |
| Data Sources/<br>Measurement | <ul style="list-style-type: none"> <li>• For each variable of interest, give sources of data and details of methods of assessment (measurement).</li> <li>• Describe comparability of assessment methods if there is more than one group</li> <li>• Data collection points table</li> <li>• Blinding procedure</li> </ul> | Page 16-19, 21<br>Tables 1-2<br>NA<br>NA<br>NA |
| Bias                         | Describe any efforts to address potential sources of bias<br><br>More specifically- <ul style="list-style-type: none"> <li>• Information bias</li> <li>• Selection Bias</li> <li>• Control for confounding</li> </ul>                                                                                                     | Pages 16-19, 21                                |
| Statistical analysis<br>plan | <ul style="list-style-type: none"> <li>• Method of primary / secondary outcomes and additional analysis</li> <li>• Handling of missing data</li> <li>• Post-hoc analysis</li> </ul>                                                                                                                                       | Pages 16-19<br><br>Pages 16-19<br>NA           |

|                                               |                                                                                                                                                                                                                                                                                                                                      |                                  |
|-----------------------------------------------|--------------------------------------------------------------------------------------------------------------------------------------------------------------------------------------------------------------------------------------------------------------------------------------------------------------------------------------|----------------------------------|
| Handling of withdrawals and lost to follow up | Describe the procedures to be followed when a participant ceases participation in the study prematurely or is lost to follow up                                                                                                                                                                                                      | Pages 14-15, 16-19               |
| Replacements                                  | Provide information on whether or not participants who discontinue the study will be replaced via additional recruitment to maintain the required sample size.                                                                                                                                                                       | NA                               |
| Outcome                                       | Define and describe all primary and secondary outcome or lost to follow up                                                                                                                                                                                                                                                           | Pages -16-19<br>Tables 1-2       |
| Database management                           | <ul style="list-style-type: none"> <li>• Detail plan of database management including:</li> <li>• Data collection (electronic or paper based),</li> <li>• Source data</li> <li>• Data entry</li> <li>• Data editing</li> <li>• Coding</li> <li>• Data storage</li> <li>• Record retention</li> <li>• Data confidentiality</li> </ul> | Page 22                          |
| Validation of instrument                      | Reliability / validity of instrument or plan to establish validation                                                                                                                                                                                                                                                                 | Page 14-15<br>Tables 1-2         |
| Follow up                                     | Plan of follow up and addressing lost to follow up                                                                                                                                                                                                                                                                                   | Page 15; Tables 1-2              |
| Quality control                               | <ul style="list-style-type: none"> <li>• Method of quality control</li> <li>• Monitoring (internal and external)</li> <li>• Training of surveyors</li> </ul>                                                                                                                                                                         | Pages 22<br>Pages 22<br>Pages 22 |
| Quality assurance                             | Plan of quality assurance                                                                                                                                                                                                                                                                                                            | Pages 22                         |

|                                                  |                                                                                              |                 |
|--------------------------------------------------|----------------------------------------------------------------------------------------------|-----------------|
| Expected outcome /results                        | A brief description of expected outcome or results                                           | Pages 21        |
| <b>iv) Ethical consideration</b>                 |                                                                                              |                 |
| Ethical approval                                 | Whether it has been obtained and name of ethical committees. If approval not sought , Reason | Page 22         |
| Agreement and consent                            | Method of taking consent. Reason if consent not sought                                       | Pages 14-15, 22 |
| Risk / Harm to participants                      | Any potential risk or harm to study participants                                             | NA              |
| Adverse event and Severe adverse event reporting | Outline how Adverse Event and Severe adverse event information will be collected.            | NA              |
| <b>v) Reporting and dissemination</b>            |                                                                                              |                 |
| Protocol amendments                              | Methods of communicating to investigators/IRBs and documenting                               | Pages 22        |
| Dissemination                                    | How results will be disseminated to participants, practitioners, public                      | Page 22         |
| Publication Plan                                 | Who has right to publish; restrictions; authorship guidelines<br>Open Access                 | NA              |
| Reporting of early stopping                      | Dissemination of results if trial is stopped early (for any reason)                          | NA              |
| <b>vi) Others</b>                                |                                                                                              |                 |
| Limitations                                      | Limitations of proposed study, including risk of bias                                        | Page 21         |
| Strength of study                                | Highlight strengths of proposed study                                                        | Page 21         |
| References                                       | List of references cited in protocol                                                         | Pages 24-30     |

|                                          |                                                                                                                                                |                              |
|------------------------------------------|------------------------------------------------------------------------------------------------------------------------------------------------|------------------------------|
| Data collection forms                    | Summary table of all forms used for data collection at each point of study                                                                     | Tables 1 and 2               |
| Informed consent forms                   | Sample of informed consent form, translated into local language                                                                                | NA                           |
| Funding                                  | Source of funding and the role of the funders for the present study                                                                            | Page 5                       |
| Acknowledgement for protocol development | Acknowledgement of persons involved in protocol preparation                                                                                    | Page 23                      |
| Data sharing policy                      | To describe how data will be made available in public domain.                                                                                  | NA                           |
| Contributions of authors to protocol     | Listed authors should have participated sufficiently in preparation of protocol with details of their contribution.                            | Page 23                      |
| Trial registry                           | For observational studies also registered as trial                                                                                             | Page 7                       |
| Annexures                                | Data collection form /instruments<br>Informed consent form<br>Standard operating procedures (SOPs)<br>Detailed Statistical analysis plan (SAP) | NA<br>NA<br>Tables 1-2<br>NA |

1  
2  
3  
4  
5  
6  
7  
8  
9  
10  
11  
12  
13  
14  
15  
16  
17  
18  
19  
20  
21  
22  
23  
24  
25  
26  
27  
28  
29  
30  
31  
32  
33  
34  
35  
36  
37  
38  
39  
40  
41  
42  
43  
44  
45  
46
