# Supplementary material for: Longitudinal cohort study investigating neurodevelopmental and socioemotional outcomes in school-entry aged children after open heart surgery in Australia and New Zealand: the NITRIC follow-up study protocol
Source: PubMed Central journal article supplement — BMJ Open. 2023 Aug 30;13(8):e075429. doi: 10.1136/bmjopen-2023-075429 (PMC10471882; doi:10.1136/bmjopen-2023-075429), 2023-08-30
Supplement: bmjopen-2023-075429supp001.pdf [file bmjopen-2023-075429supp001.pdf]

**Supplemental materials for:****A Longitudinal Cohort Study Investigating Neurodevelopmental and Socio-emotional Outcomes in School-Entry aged Children after Open Heart Surgery in Australia and New Zealand: The NITRIC Follow-up Study Protocol**

Debbie Long<sup>1,2</sup>, Vicki A Anderson<sup>3,4</sup>, Louise H Crossley<sup>3</sup>, Nikita Tuli Sood<sup>3</sup>, Karina R Charles<sup>1,2</sup>, Anna D MacDonald<sup>5</sup>, Samudragupta Bora<sup>6,7</sup>, Carmela F Pestell<sup>8</sup>, Kathryn Murrell<sup>9</sup>, Natalie Pride<sup>10</sup>, Peter J Anderson<sup>11</sup>, Nadia Badawi<sup>12</sup>, Brian Rose<sup>5,13</sup>, Heidi Baillie<sup>14</sup>, Kate Masterson<sup>3,15</sup>, Jenipher Chumbes Flores<sup>16</sup>, Claire Sherring<sup>17</sup>, Sainath Raman<sup>2,5</sup>, John Beca<sup>17</sup>, Simon Erickson<sup>16</sup>, Marino S Festa<sup>14</sup>, Benjamin W Anderson<sup>18,19</sup>, Prem Venugopal<sup>19,20</sup>, Deane Yim<sup>21</sup>, David Andrews<sup>22</sup>, Michael M H Cheung<sup>3,23</sup>, Christian P Brizard<sup>3,24</sup>, Thomas L Gentles<sup>25,26</sup>, Ajay Iyengar<sup>26,27</sup>, Ian A Nicholson<sup>28</sup>, Julian Ayer<sup>28</sup>, Warwick Butt<sup>3,15</sup>, Luregn J Schlapbach<sup>5,29</sup>, Kristen S Gibbons<sup>5</sup>, and The NITRIC Follow-up Study Group, and The Australian and New Zealand Intensive Care Society (ANZICS) Paediatric Study Group (PSG)

<sup>1</sup> School of Nursing, Centre for Healthcare Transformation, Queensland University of Technology, Kelvin Grove, QLD, Australia

<sup>2</sup> Paediatric Intensive Care Unit, Queensland Children's Hospital, South Brisbane, QLD Australia

<sup>3</sup> Clinical Sciences, Murdoch Children's Research Institute, Parkville, VIC, Australia

<sup>4</sup> Psychology Service, Royal Children's Hospital Melbourne, Parkville, VIC, Australia

<sup>5</sup> Child Health Research Centre, The University of Queensland, Brisbane, QLD, Australia

<sup>6</sup> Department of Pediatrics, University Hospitals Rainbow Babies & Children's Hospital, Case Western Reserve University School of Medicine, Cleveland, OH, United States

<sup>7</sup> Mater Research Institute, Faculty of Medicine, The University of Queensland, Brisbane, QLD, Australia

<sup>8</sup> School of Psychological Science, University of Western Australia, Crawley, WA, Australia

<sup>9</sup> Consult Liaison Team, Starship Children's Hospital, Auckland, New Zealand

<sup>10</sup> Kids Neuroscience Centre, The Children's Hospital at Westmead, Westmead, NSW, Australia

<sup>11</sup> Turner Institute for Brain and Mental Health, School of Psychological Sciences, Monash University, Clayton, VIC, Australia

<sup>12</sup> Grace Centre for Newborn Care, The Children's Hospital at Westmead, Westmead, NSW, Australia

<sup>13</sup> Australian and New Zealand Fontan Advocacy Committee, HeartKids Ltd, Sydney, NSW, Australia

<sup>14</sup> Paediatric Intensive Care Unit, The Children's Hospital at Westmead, Westmead, NSW, Australia

<sup>15</sup> Paediatric Intensive Care Unit, Royal Children's Hospital, Parkville, VIC, Australia

<sup>16</sup> Paediatric Intensive Care Unit, Perth Children's Hospital, Nedlands, WA, Australia

<sup>17</sup> Paediatric Intensive Care Unit, Starship Children's Hospital, Auckland, New Zealand

<sup>18</sup> Queensland Paediatric Cardiac Service, Children's Health Queensland Hospital and Health Service, South Brisbane, QLD, Australia

<sup>19</sup> School of Medicine, The University of Queensland, South Brisbane, QLD, Australia

<sup>20</sup> Department for Cardiac Surgery, Queensland Children's Hospital, Brisbane, QLD, Australia

<sup>21</sup> Department of Paediatric Cardiology, Perth Children's Hospital, Nedlands, WA, Australia

<sup>22</sup> Department of Cardiothoracic Surgery, Perth Children's Hospital, Nedlands, WA, Australia

<sup>23</sup> Department of Cardiology, Royal Children's Hospital, Parkville, VIC, Australia

<sup>24</sup> Murdoch Children's Research Institute, Parkville, VIC, Australia

<sup>25</sup> Department of Cardiac Surgery, Royal Children's Hospital, Parkville, VIC, Australia

<sup>26</sup> Paediatric and Congenital Cardiac Service, Starship Children's Hospital, Auckland, New Zealand

<sup>27</sup> Paediatrics, Child and Youth Health, University of Auckland, Auckland, New Zealand

<sup>28</sup> Department of Surgery, University of Auckland, Auckland, New Zealand

<sup>29</sup> Heart Centre for Children, The Children's Hospital at Westmead, Westmead, NSW, Australia

<sup>30</sup> Department of Intensive Care and Neonatology, Children's Research Centre, University Children's Hospital Zurich, Zurich, Switzerland

### **The NITRIC Follow-up Study Group**

Kristen S Gibbons, Luregn J Schlapbach, Samudragupta Bora, Devika Ganesamoorthy, Anna D MacDonald, Antje Blumenthal, Trang M T Pham, Endrias Ergetu, The University of Queensland, Brisbane, Australia; Debbie Long, Queensland University of Technology, Brisbane, Australia; Sainath Raman, Karina R Charles, Prem Venugopal, Benjamin W Anderson, Queensland Children's Hospital, Brisbane, Australia; Warwick Butt, Vicki A Anderson, Kate Masterson, Jenni Braeutigam, Michael M H Cheung, Christian P Brizard, Royal Children's Hospital, Melbourne, Australia; Peter J Anderson, Monash University, Melbourne, Australia; Lachlan Coin, University of Melbourne, Melbourne, Australia; Simon Erickson, Carmela F Pestell, Jenipher Chumbes Flores, Deane Yim, David Andrews, Perth Children's Hospital, Perth, Australia; Marino S Festa, Nadia Badawi, Natalie Pride, Heidi Baillie, Jennifer Darvas, Ian A Nicholson, Julian Ayer, The Children's Hospital at Westmead, Sydney, Australia; John Beca, Kathryn Murrell, Laura Brown, Claire Sherring, Shelley Coetzer, Thomas L Gentles, Ajay Iyengar, Starship Children's Hospital, Auckland, New Zealand; and Brian Rose, Holly Williams, Consumer Representatives.

### **The ANZICS PSG**

Breanna Pellegrini, Australian and New Zealand Paediatric Intensive Care Registry; Shane George, Gold Coast University Hospital, Gold Coast, Australia; Corrine Balit, John Hunter Hospital, Newcastle, Australia; Felix Oberender, Monash Children's Hospital, Melbourne, Australia; Simon Erickson, Jenipher Chumbes Flores, Perth Children's Hospital, Perth, Australia; Karina Charles, Sainath Raman, Michaela Waak, Queensland Children's Hospital, Brisbane, Australia; Debbie Long, Queensland University of Technology, Brisbane, Australia; Warwick Butt (Chair), Carmel Delzoppo, Ben Gelbart, Kate Masterson, Johnny Millar, Royal Children's Hospital, Melbourne, Australia; Anusha Ganeshalingam, Claire Sherring, Starship Children's Hospital, Auckland, New Zealand; Puneet Singh, Vicky Smith, Sydney Children's Hospital, Randwick, Australia; Kristen Gibbons, Luregn Schlapbach (Past Chair), Jessica Schults, The University of Queensland, Brisbane, Australia; and Jennifer Darvas, Marino Festa, The Children's Hospital at Westmead, Sydney, Australia.

### **Corresponding Author:**

A/Prof Kristen Gibbons, PhD

Child Health Research Centre, The University of Queensland

62 Graham St, South Brisbane, Queensland, 4101, Australia

Email: [k.gibbons@uq.edu.au](mailto:k.gibbons@uq.edu.au); Phone: +61 407 966 708

**Table of Contents:**

Table S1. Parent-completed online screening assessments conducted at 2- to 5-years of age

Table S2. Face-to-face neurodevelopmental assessment at 5-years of age

References.

**Table S1. Parent-completed online screening assessments conducted at 2- to 5-years of age**

| Construct                                 | Instrument <sup>#^</sup>                                           | Number of Items    | Scoring and Interpretation                                                                                                                                                                                                                                                                                                                                                   | Comments                                                                                                                                                                                                   |
|-------------------------------------------|--------------------------------------------------------------------|--------------------|------------------------------------------------------------------------------------------------------------------------------------------------------------------------------------------------------------------------------------------------------------------------------------------------------------------------------------------------------------------------------|------------------------------------------------------------------------------------------------------------------------------------------------------------------------------------------------------------|
| <b>Child-focused Measures<sup>§</sup></b> |                                                                    |                    |                                                                                                                                                                                                                                                                                                                                                                              |                                                                                                                                                                                                            |
| Neurodevelopment                          | Ages and Stages Questionnaire, 3 <sup>rd</sup> Edition (ASQ-3) (1) | 30                 | Each item scored: Yes, Sometimes, or Not yet.<br>Above, close to, and below cut-off scores provided based on aged norms for each domain. Domain scores added to create total score. Higher scores indicate better neurodevelopment.<br><i>Main outcome definition: Total ASQ-3 Score (continuous)</i>                                                                        | 5-10 mins to complete.<br>21 age-appropriate questionnaires for 1-66 months.<br>Domains: communication, gross motor, fine motor, problem-solving and personal-social.                                      |
| Socioemotional Behavior                   | Strengths and Difficulties Questionnaire (SDQ) (2)                 | 25                 | Each item scored on a 3-point Likert scale: Not true, somewhat true, certainly true. Scale scores derived for Emotional problems, Conduct problems, Hyperactivity, Peer problems, Prosocial, and Total Difficulties, compared to aged norms. Higher scores indicate better socioemotional behavior.<br><i>Main outcome definition: Total Difficulties Score (continuous)</i> | 5-10 mins to complete.<br>Two age-appropriate questionnaires for 2-17 years.<br>Domains: emotional symptoms, conduct problems, hyperactivity/inattention, peer relationship problems, prosocial behaviors. |
| Health Related Quality of Life (HRQoL)    | Pediatric Quality of Life Inventory (PedsQL) (3, 4)                | 23-38 <sup>a</sup> | Each item scored on a 5-point Likert scale: 0 = Never a problem to 4 = Almost always a problem.<br>Psychosocial Health Summary Score, Physical Health Summary Score, and Total Score, compared to aged norms. Higher scores indicate better HRQoL.<br><i>Main outcome definition: Total PedsQL Score (continuous)</i>                                                        | 5 mins to complete.<br>Five age-appropriate questionnaires for 1 month – 18 years.<br>Domains: physical, emotional, social, and school functioning.                                                        |

| Construct                      | Instrument <sup>#^</sup>                                                            | Number of Items | Scoring and Interpretation                                                                                                                                                                                                                                                                                                                                        | Comments                                                                                                                                                                                 |
|--------------------------------|-------------------------------------------------------------------------------------|-----------------|-------------------------------------------------------------------------------------------------------------------------------------------------------------------------------------------------------------------------------------------------------------------------------------------------------------------------------------------------------------------|------------------------------------------------------------------------------------------------------------------------------------------------------------------------------------------|
| Executive Functioning          | Behavior Rating Inventory for Executive Function for Pre-schoolers (BRIEF-P) (5)    | 63              | Each item scored.<br>Inhibitory Self-Control Index, Flexibility Index, Emergent Metacognition and Global Executive Composite score, compared to aged norms. The recommended cut-off for clinical significance is $\geq 65$ . Lower scores indicate better executive functioning.<br><i>Main outcome definition: Global Executive Composite Score (continuous)</i> | 10-15 mins to complete.<br>One questionnaire 2 - 5 years 11 months.<br>Domains: inhibit, shift, emotional control, working memory, plan/organize.                                        |
| Fatigue                        | The Pediatric Quality of Life Inventory (PedsQL) Multidimensional Fatigue Scale (6) | 6               | Each item scored on 5-point Likert scale: 0 = Never a problem to 4 = Almost always a problem.<br>Total score compared to aged norms. Higher scores indicate lower problems.<br><i>Main outcome definition: Total General Fatigue Score (continuous)</i>                                                                                                           | General Fatigue subscale only<br>2 minutes to complete.<br>Four age-appropriate questionnaires for 2 – 18 years.<br>Domains: General fatigue, Sleep/rest fatigue, and Cognitive fatigue. |
| Healthcare Utilisation         | Developed by research team.                                                         | 12              | <i>Main outcome definition: Total parent-reported utilisation of in- and out-patient visits and costs (continuous)</i>                                                                                                                                                                                                                                            | 2 minutes to complete.<br>Domains: Visits to healthcare professionals and facilities, and finances relating to appointments and care                                                     |
| <b>Parent-focused Measures</b> |                                                                                     |                 |                                                                                                                                                                                                                                                                                                                                                                   |                                                                                                                                                                                          |
| Emotional Wellbeing            | The Kessler-6 (K6) (7)                                                              | 6               | Items are scored on a 5-point Likert scale (1= 'none of the time' to 5 = 'all of the time'). Total score ranged from 0-24, with higher scores representing higher levels of psychological distress such as anxiety and depression.<br><i>Main outcome definition: Total K6 Score (continuous)</i>                                                                 | 1 minute to complete                                                                                                                                                                     |

| Construct        | Instrument <sup>#^</sup>                              | Number of Items | Scoring and Interpretation                                                                                                                                                                                                                                                                                              | Comments                                                                                                           |
|------------------|-------------------------------------------------------|-----------------|-------------------------------------------------------------------------------------------------------------------------------------------------------------------------------------------------------------------------------------------------------------------------------------------------------------------------|--------------------------------------------------------------------------------------------------------------------|
| Parenting Stress | The Parenting Stress Index-4 Short Form (PSI-4-SF)(8) | 36              | Items are scored on a 4-point Likert scale: 1 = Strongly agree to 5 = strongly disagree. A percentile score on Total stress $\geq$ 91% indicates clinically significant levels of stress. Higher scores indicate more parenting stress.<br><i>Main outcome definition: Total PIS-4-SF Percentile Score (continuous)</i> | 10 minutes to complete.<br>Domains: Parental distress, Parent-child dysfunctional interaction, and Difficult child |

<sup>#</sup>All measures used in accordance with associated user manuals; <sup>^</sup>Order of administration of questionnaires standardized; <sup>§</sup> All child-focused measures validated for use as parent-reported; <sup>a</sup> Depending on age.

**Table S2. Face-to-face neurodevelopmental assessment at 5-years of age**

| Construct                    | Instrument <sup>#^</sup>                                                                                                                        | Number of Items | Scoring and Interpretation                                                                                                                                                                                                                                                 | Comments                                                                                                                                                            |
|------------------------------|-------------------------------------------------------------------------------------------------------------------------------------------------|-----------------|----------------------------------------------------------------------------------------------------------------------------------------------------------------------------------------------------------------------------------------------------------------------------|---------------------------------------------------------------------------------------------------------------------------------------------------------------------|
| <b>Face-to-Face Measures</b> |                                                                                                                                                 |                 |                                                                                                                                                                                                                                                                            |                                                                                                                                                                     |
| Cognition                    | Wechsler Preschool & Primary Scale of Intelligence – 4 <sup>th</sup> Edition Australia and New Zealand Standardised Edition (WPPSI-IV A&NZ) (9) | 15 subtests     | Three levels of interpretation: Full Scale, Primary Index scales, and Ancillary Index scales. The Full Scale and all indexes have a mean score of 100 and SD of 15. Higher scores indicate higher cognition.<br><i>Main outcome definition: Full Scale IQ (continuous)</i> | Block design, Information, Matrix reasoning, Bug search, Picture memory, Similarities, Cancellation and Zoo location subtests only. Administration time: 45-60 mins |
| Motor function               | Movement Assessment Battery for Children, 2 <sup>nd</sup> Edition (MABC-2) (10)                                                                 | 8 tasks         | 8 Task standard scores and a Total test score. Manual dexterity component score: sum of standard scores of MD1, MD2 and MD3. Higher scores indicate better motor function.<br><i>Main outcome definition: Manual Dexterity Component Score (continuous)</i>                | Posting coins, Threading beads and Drawing trail 1 subtests only. Administration time: 10 mins                                                                      |
| Executive Function           | Day/Night Task (11)                                                                                                                             | 16 cards        | Total correct, Total Self Corrections, Total Time, Efficiency Score (Total Correct/Total Time to Complete). Higher scores indicate better executive function.<br><i>Main outcome definition: Efficiency Score (continuous)</i>                                             | Administration time: 5 mins                                                                                                                                         |

| Construct          | Instrument <sup>#^</sup>                                                                                                                           | Number of Items  | Scoring and Interpretation                                                                                                                                                                                                                                                         | Comments                                                                                                                     |
|--------------------|----------------------------------------------------------------------------------------------------------------------------------------------------|------------------|------------------------------------------------------------------------------------------------------------------------------------------------------------------------------------------------------------------------------------------------------------------------------------|------------------------------------------------------------------------------------------------------------------------------|
| Attention - Visual | Test of Everyday Attention for Children, 2 <sup>nd</sup> Edition (TEA-Ch2) (12)                                                                    | 5 trials         | Scaled scores have a mean of 10 and SD of 3 (Range 1-19). Percentile ranked score. Higher scores indicate better attention.<br><i>Main outcome definition: Attention Score (continuous)</i>                                                                                        | Balloon Hunt and Balloons 5 subtests only.<br>Administration time: 7 mins                                                    |
| Language           | Clinical Evaluation of Language Fundamentals – Australian and New Zealand 5 <sup>th</sup> Edition Screening Test (CELF-5 A&NZ Screening Test) (13) | 13               | Total Score: sum of the child's score points. Total score compared to a research-based criterion score appropriate for the child's age. Age 5:0-8:11 have one criterion score. Higher scores indicate better language.<br><i>Main outcome definition: Total Score (continuous)</i> | Word structure, Word Classes, Following directions and Recalling sentences subtests only.<br>Administration time: 10-15 mins |
| Attention          | Conners Kiddie Continuous Performance Test, 2 <sup>nd</sup> Edition (K-CPT 2) (14)                                                                 | Up to 200 trials | Higher scores indicate poorer attention.<br><i>Main outcome definition: Composite Attention Score</i>                                                                                                                                                                              | 4 domains of attention: Impulsivity, Inattentiveness, Sustained attention, and Vigilance.<br>Administration time: 7 mins     |



| Construct                               | Instrument <sup>#^</sup>                                                            | Number of Items           | Scoring and Interpretation                                                                                                                                                                                                                                                                                                                                                             | Comments                                                   |
|-----------------------------------------|-------------------------------------------------------------------------------------|---------------------------|----------------------------------------------------------------------------------------------------------------------------------------------------------------------------------------------------------------------------------------------------------------------------------------------------------------------------------------------------------------------------------------|------------------------------------------------------------|
| Memory                                  | Wide Range Assessment of Memory and Learning, 3 <sup>rd</sup> Edition (WRAML3) (15) | 4 stories<br>85 questions | Scaled score, M=10, SD=3. Subtest scaled scores derived from the total raw scores on a given subtest- and describe the overall performance on that subtest.<br>Story Memory – story memory total raw score.<br>Story Recognition – story memory recognition total raw score. Higher scores indicate better memory.<br><i>Main outcome definition: Verbal Memory Score (continuous)</i> | Story Memory subtest only.<br>Administration time: 20 mins |
| Memory                                  | Working Memory Test Battery for Children (WMTB-C) (16)                              | 9                         | Trials Correct Score: Total number of correct trials achieved before testing is discontinued. Higher scores indicate better memory.<br><i>Main outcome definition: Total Trials Correct (continuous)</i>                                                                                                                                                                               | Digit Recall subtest only.<br>Administration time: 5 mins  |
| <b>Parent-completed Online Measures</b> |                                                                                     |                           |                                                                                                                                                                                                                                                                                                                                                                                        |                                                            |
| Social behavior/Autism                  | Social Responsiveness Scale, 2 <sup>nd</sup> Edition (SRS-2) (17)                   | 65                        | Each item scored on a 4-point Likert scale: 1 = Not true to 4 = Almost always true.<br>Scores: Total, Treatment subscales, DSM-5 compatible subscales. Higher scores indicate clinically significant deficiencies in social behavior<br><i>Main outcome definition: Total Score (continuous)</i>                                                                                       | Administration time: 15-20 mins                            |

| Construct          | Instrument <sup>#^</sup>                                                   | Number of Items | Scoring and Interpretation                                                                                                                                                                                                                                                                                                                                                                                                                                                                                                   | Comments                                                                                                           |
|--------------------|----------------------------------------------------------------------------|-----------------|------------------------------------------------------------------------------------------------------------------------------------------------------------------------------------------------------------------------------------------------------------------------------------------------------------------------------------------------------------------------------------------------------------------------------------------------------------------------------------------------------------------------------|--------------------------------------------------------------------------------------------------------------------|
| ADHD               | ADHD Rating Scale, 5 <sup>th</sup> Edition (ADHD-RS-5) (18)                | 18              | Each item scored on a 4-point Likert scale.<br>Scores: Total, Inattention and Hyperactivity-Impulsivity.<br>Total raw score: Sum of inattention and hyperactivity subscale raw scores. Converted to total percentile score. Higher scores indicate more impairment in attention.<br><i>Main outcome definition: Total Percentile Score (continuous)</i>                                                                                                                                                                      | Administration time: 5 mins                                                                                        |
| Social functioning | Adaptive Behavior Assessment System, 3 <sup>rd</sup> Edition (ABAS-3) (19) | 46              | Each item is scored on a 4-point Likert scale: 0 = Is not able to do this behavior to 3 = Always (or almost always)<br>Standard Score for Social Adaptive domain compared to norms. Mean of 100 and SD of 15. Lower scores indicate lower adaptive behaviors. General Adaptive Composite Score: Composed on all measured skill areas, providing an overall estimate of adaptive behavior. Higher scores indicate better social functioning.<br><i>Main outcome definition: General Adaptive Composite Score (continuous)</i> | Leisure and Social subscales only<br>Administration time: 10 mins<br>One age-appropriate questionnaire 5-21 years. |

| Construct               | Instrument <sup>#^</sup>                                                                     | Number of Items | Scoring and Interpretation                                                                                                                                                                                                                                                                                                                           | Comments                                                                                                                                                 |
|-------------------------|----------------------------------------------------------------------------------------------|-----------------|------------------------------------------------------------------------------------------------------------------------------------------------------------------------------------------------------------------------------------------------------------------------------------------------------------------------------------------------------|----------------------------------------------------------------------------------------------------------------------------------------------------------|
| Fatigue                 | Pediatric Quality of Life Inventory (PedsQL) Multidimensional Fatigue Scale – Full scale (6) | 18              | Each item scored on 5-point Likert scale: 0 = Never a problem to 4 = Almost always a problem.<br>Total score: Sum of general, sleep/rest and cognitive fatigue. Higher scores indicate lower problems.<br><i>Main outcome definition: Total Fatigue Score (continuous)</i>                                                                           | Administration time: 5 mins<br>Four age-appropriate questionnaires 2 – 18 years.<br>Domains: General fatigue, Sleep/rest fatigue, and Cognitive fatigue. |
| Parent-Child Attachment | Attachment Relationship Inventory-Caregiver Perspective (ARI-CP 2-5) (20)                    | 48              | Each item scored on a 6-point Likert scale: 1 = Not at all applicable to 5 = Fully applicable.<br>Four subscales (secure, avoidant, ambivalent, disorganized).<br>Scale scores represent the sum scores of all items of the scale. Higher scores indicate better attachment.<br><i>Main outcome definition: Global Attachment Score (continuous)</i> | Administration time: 5 mins                                                                                                                              |

<sup>#</sup>All measures used in accordance with associated user manuals; <sup>^</sup>Order of administration of questionnaires standardized; <sup>a</sup> Depending on age.

## References

1. Squires J, Potter L, Bricker D. The ASQ user's guide for the Ages & Stages Questionnaires: A parent-completed, child-monitoring system. Baltimore, MD, US: Paul H Brookes Publishing; 1995. xvi, 156-xvi, p.
2. Goodman R. The Strengths and Difficulties Questionnaire: a research note. *J Child Psychol Psychiatry*. 1997;38(5):581-6.
3. Varni JW, Burwinkle TM, Seid M, Skarr D. The PedsQL 4.0 as a pediatric population health measure: feasibility, reliability, and validity. *Ambul Pediatr*. 2003;3(6):329-41.
4. Varni JW, Seid M, Kurtin PS. PedsQL 4.0: reliability and validity of the Pediatric Quality of Life Inventory version 4.0 generic core scales in healthy and patient populations. *Med Care*. 2001;39(8):800-12.
5. Gioia G, K. E, Isquith P. Behavior Rating Inventory of Executive Function Preschool Version (BRIEF-P). Odessa, Florida: Psychological Assessment Resources; 2002.
6. Varni JW, Burwinkle TM, Katz ER, Meeske K, Dickinson P. The PedsQL in pediatric cancer: reliability and validity of the Pediatric Quality of Life Inventory Generic Core Scales, Multidimensional Fatigue Scale, and Cancer Module. *Cancer*. 2002;94(7):2090-106.
7. Kessler RC, Andrews G, Colpe LJ, Hiripi E, Mroczek DK, Normand SL, et al. Short screening scales to monitor population prevalences and trends in non-specific psychological distress. *Psychol Med*. 2002;32(6):959-76.
8. Haskett ME, Ahern LS, Ward CS, Allaire JC. Factor structure and validity of the parenting stress index-short form. *J Clin Child Adolesc Psychol*. 2006;35(2):302-12.
9. Wechsler D. Wechsler Preschool and Primary Scale of Intelligence – Fourth Edition. San Antonio, Texas: The Psychological Corporation; 2012.
10. Henderson S, Sugden D, Barnett A. Movement Assessment Battery for Children-2. London: Pearson Assessment; 2007.
11. Gerstadt CL, Hong YJ, Diamond A. The relationship between cognition and action: performance of children 3 1/2-7 years old on a Stroop-like day-night test. *Cognition*. 1994;53(2):129-53.
12. Manly T, Anderson V, Crawford J, George M, Underbjerg M, Robertson IH. Test of Everyday Attention for Children, Second Edition (TEA–Ch2). London: Harcourt Assessment; 2016.
13. Wiig EH, Secord WA, Semel E. Clinical evaluation of language fundamentals: CELF-5. *Journal of Psychoeducational Assessment*. 2013a;33(5):495-500.
14. Conners KC. Conners K-CPT 2. Toronto, Canada: Multi-Health Systems; 2015.
15. Sheslow D, Adams W. Wide Range Assessment of Memory and Learning, 2nd Edition (WRAML2). Pearson; 2003.
16. Gathercole S, Pickering S. Working Memory Test Battery for Children (WMTB-C). United Kingdom: Pearson Clinical; 2001.
17. Constantino J, Gruber C. Social Responsiveness Scale - Second Edition (SRS-2). Torrance, California: Western Psychological Services; 2012.
18. DuPaul GJ. Parent and teacher ratings of ADHD symptoms: Psychometric properties in a community-based sample. *Journal of Clinical Child Psychology*. 1991;20:245-53.
19. Harrison P, Oakland T. Adaptive Behavior Assessment System - Third Edition (ABAS-3). Sydney: PsychCorp; 2015.
20. Spruit A, Colonnese C, Wissink I, Uittenbogaard R, Willems L, Stams GJ, et al. Development and validation of the Attachment Relationship Inventory—Caregiver Perception 2–5 years (ARI-CP 2–5): Psychometric structure, external validity, and norms. *Infant mental health journal*. 2021;42(2):188-205.
